# Supplementary material for: Integrative Analysis of the Metabolome and Transcriptome Provides Insights into the Mechanisms of Flavonoid Biosynthesis in Quinoa Seeds at Different Developmental Stages
Source: MDPI journal article supplement (doi:10.3390/metabo12100887), 2022-09-22
Supplement: s1 [file s1]

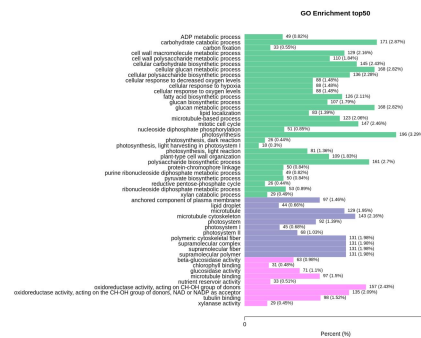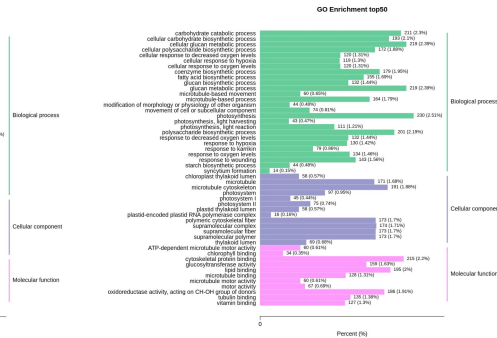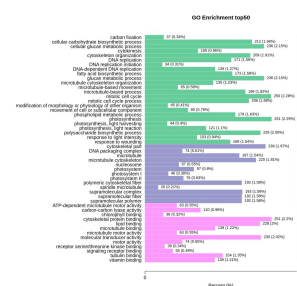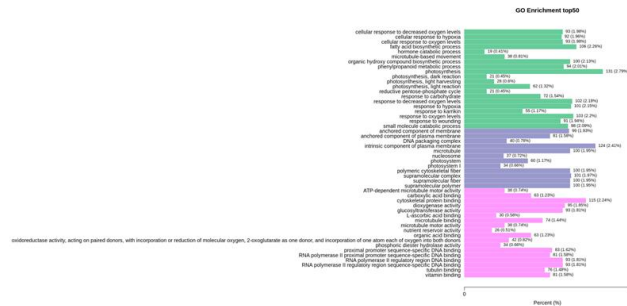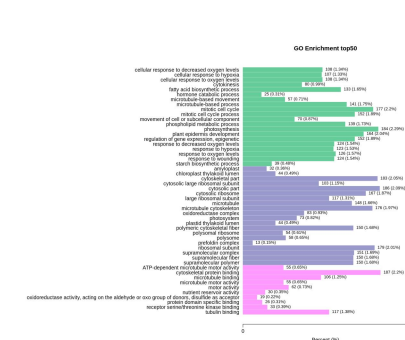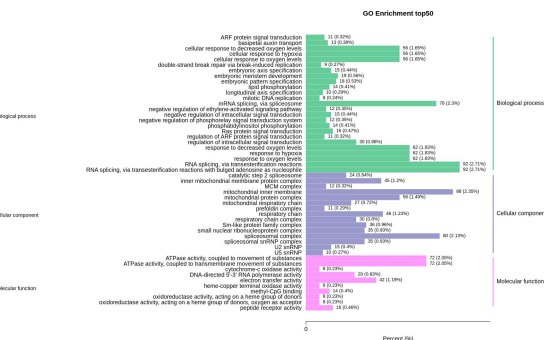

Figure S6. Column diagram of differential gene GO enrichment The abscissa represents the proportion of genes annotated in a given entry to the total number of genes annotated, and the ordinate represents the name of the GO entry. The label on the right side of the figure represents the classification to which the GO item belongs.
