# Supplementary material for: Integrative Analysis of the Metabolome and Transcriptome Provides Insights into the Mechanisms of Flavonoid Biosynthesis in Quinoa Seeds at Different Developmental Stages
Source: MDPI journal article supplement (doi:10.3390/metabo12100887), 2022-09-22
Supplement: s1 [file s1]

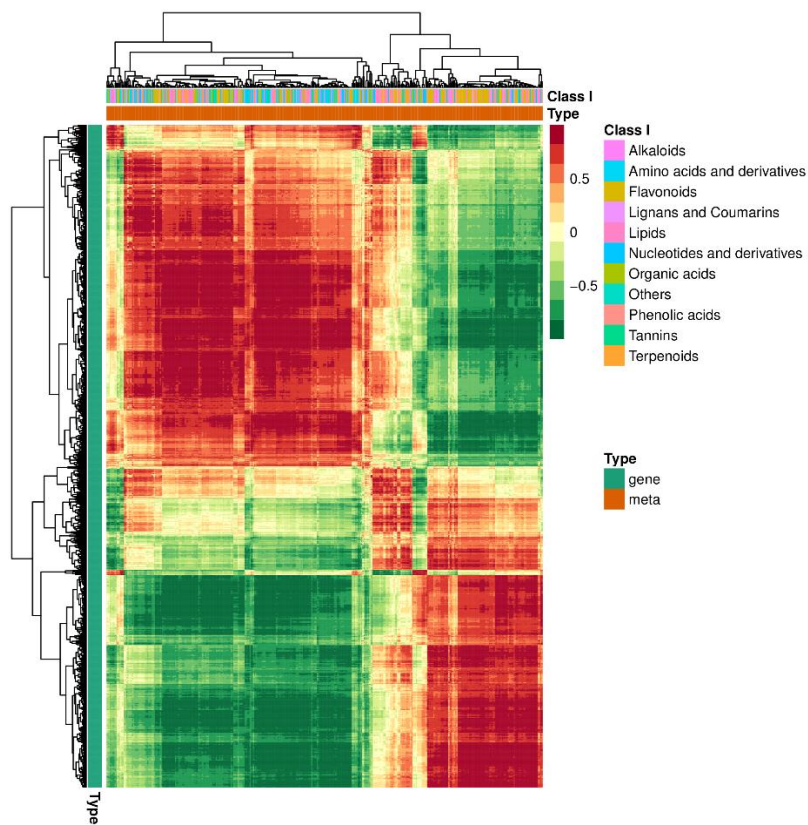

FB2 VS. RB2

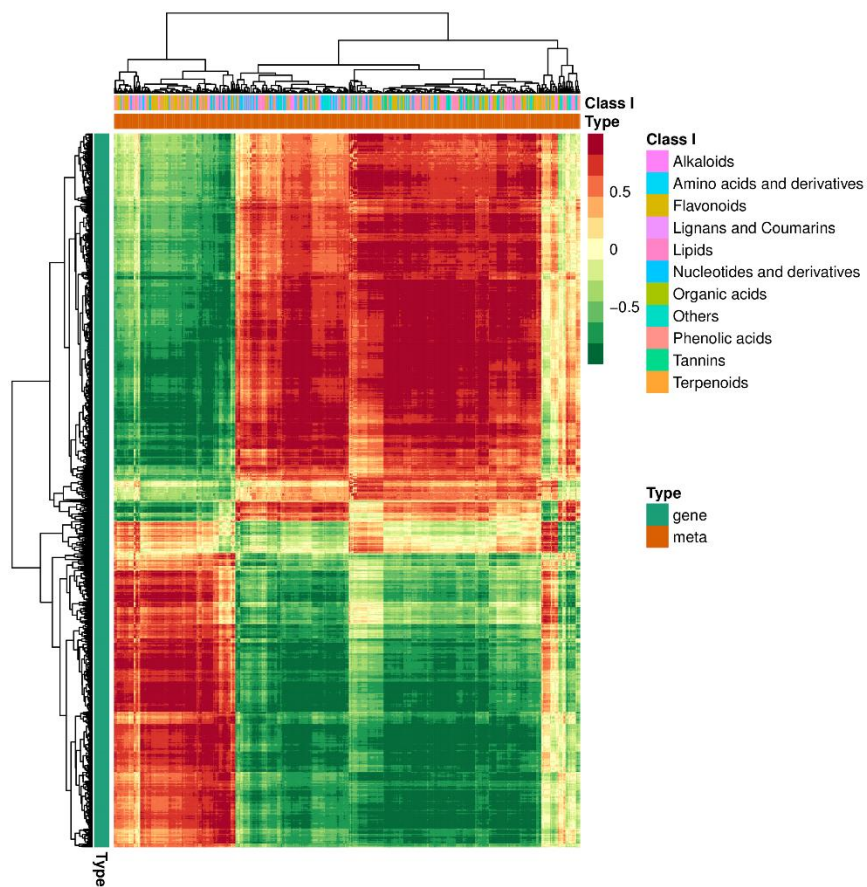

FB2 VS. DB2

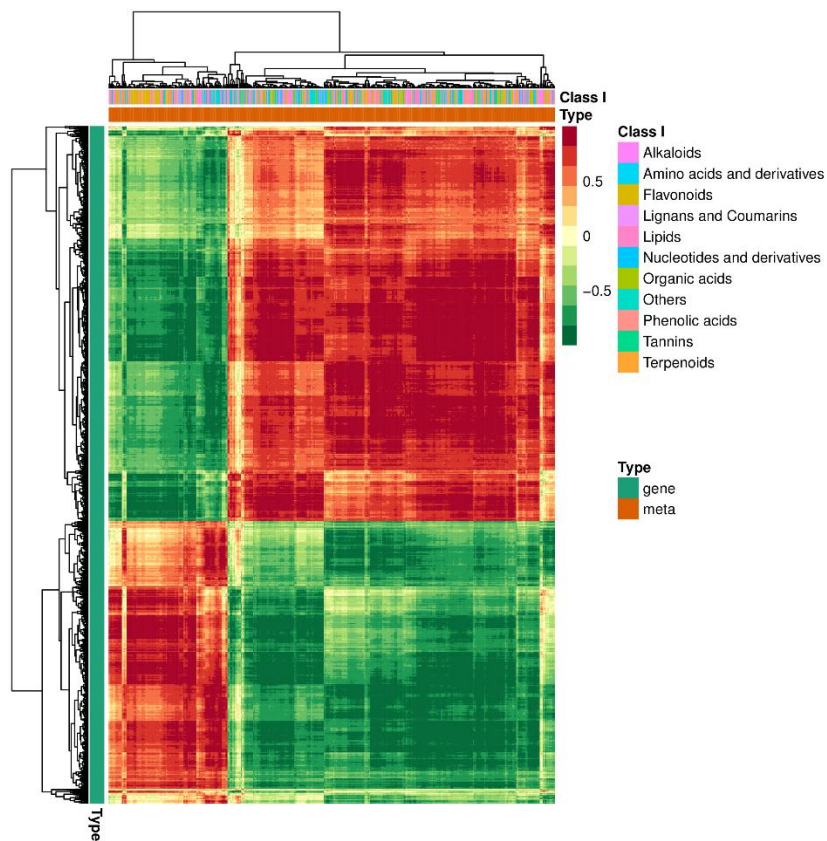

FB2 VS. MB2

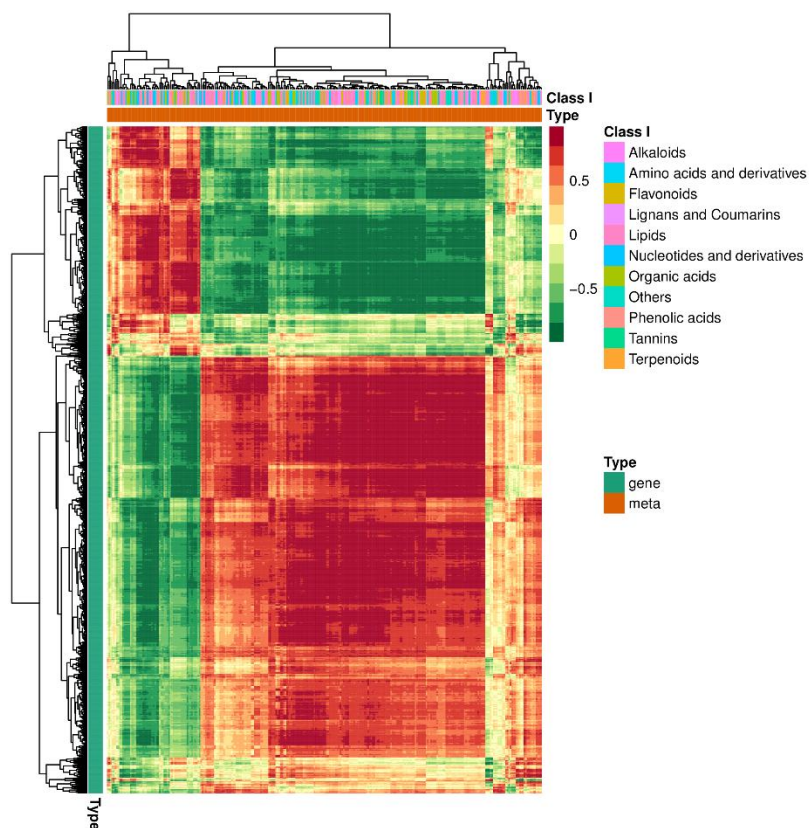

RB2 VS. DB2

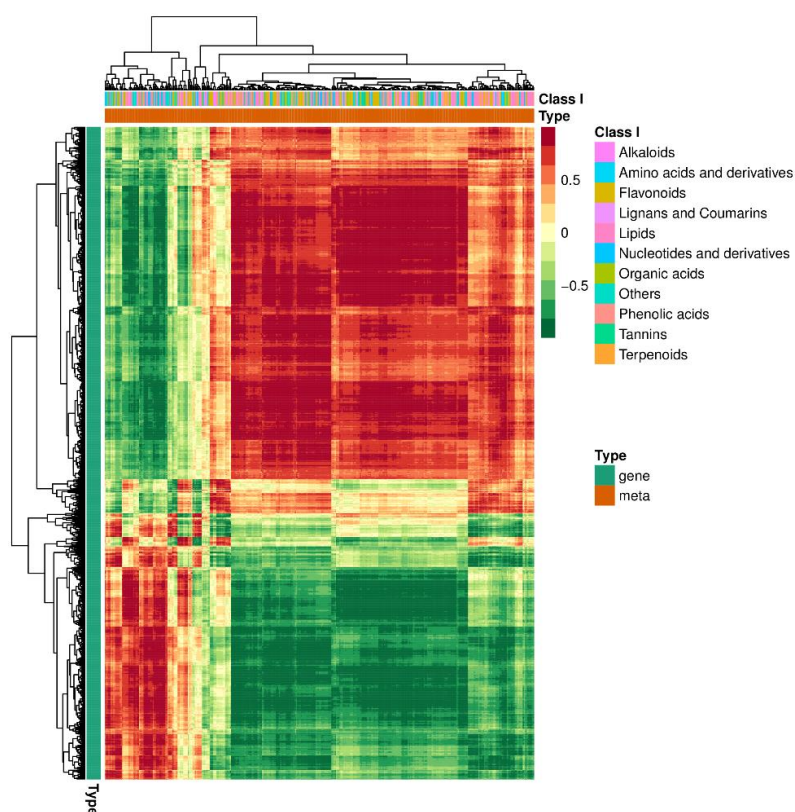

RB2 VS. MB2

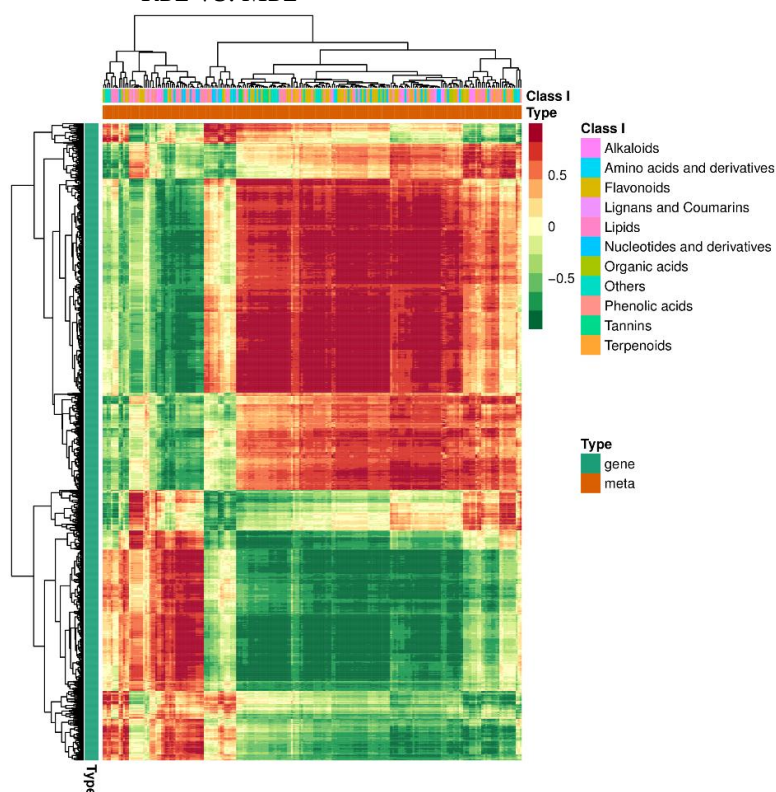

DB2 VS. MB2

Figure S9. Correlation Clustering heat map. Note: each row in the figure is a gene, and each column is a metabolite. Red represents a positive correlation between genes and metabolites, and green represents a negative correlation between genes and metabolites
