# Supplementary material for: Integrative Analysis of the Metabolome and Transcriptome Provides Insights into the Mechanisms of Flavonoid Biosynthesis in Quinoa Seeds at Different Developmental Stages
Source: MDPI journal article supplement (doi:10.3390/metabo12100887), 2022-09-22
Supplement: s1 [file s1]

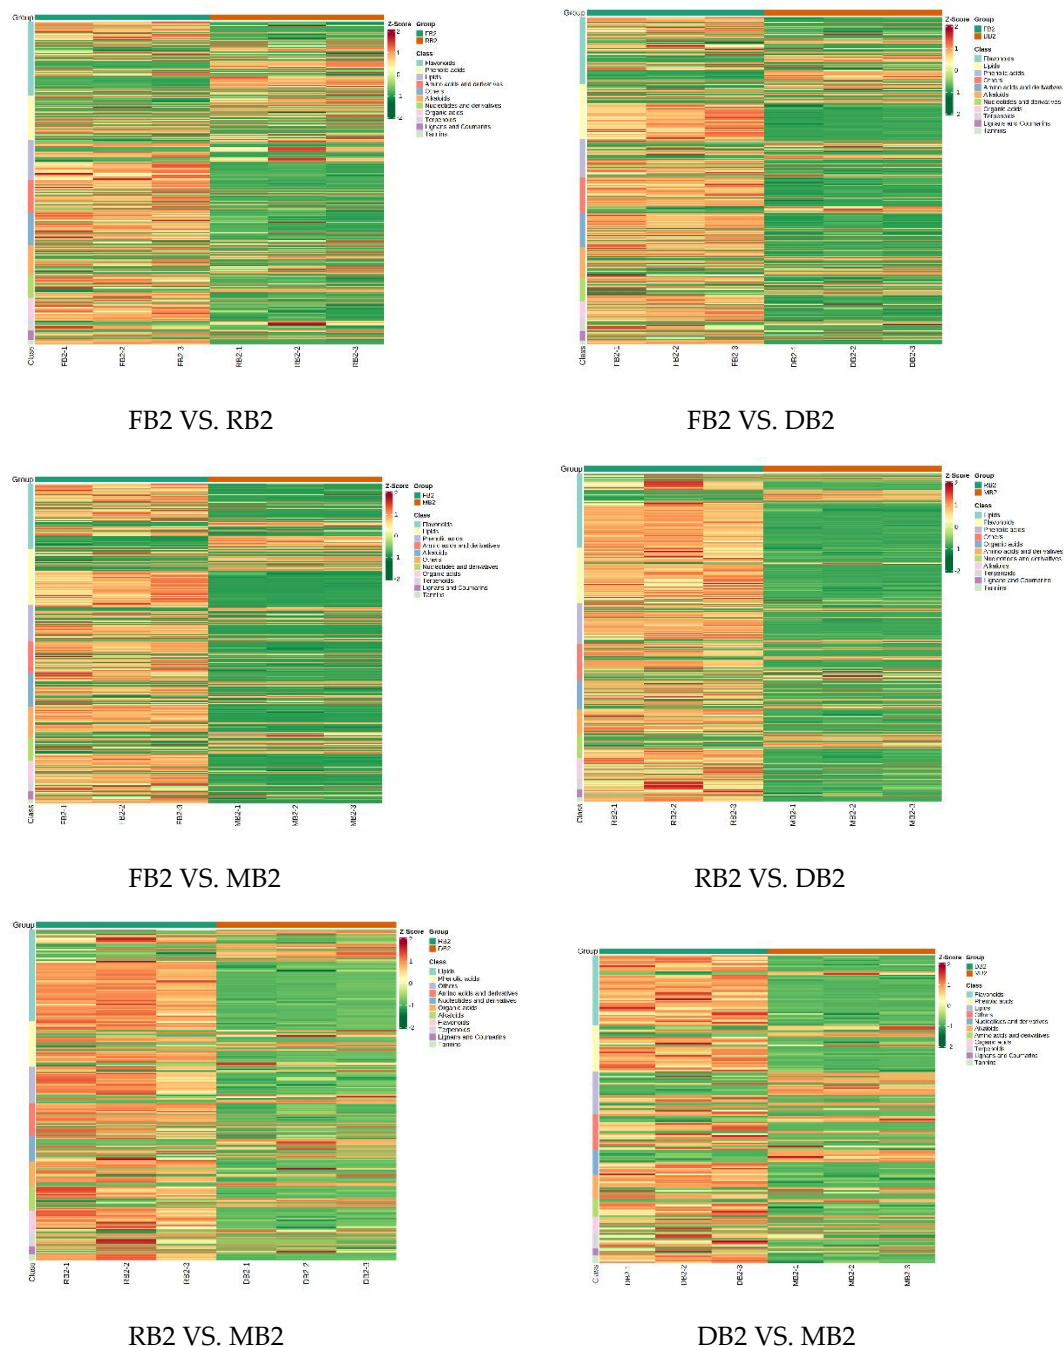

Figure S5. Differential gene clustering heat map. The abscissa represents the sample name and hierarchical clustering results, and the ordinate represents the differential genes and hierarchical clustering results. Red indicates high expression and green indicates low expression.
