# Supplementary material for: Integrative Analysis of the Metabolome and Transcriptome Provides Insights into the Mechanisms of Flavonoid Biosynthesis in Quinoa Seeds at Different Developmental Stages
Source: MDPI journal article supplement (doi:10.3390/metabo12100887), 2022-09-22
Supplement: s1 [file s1]

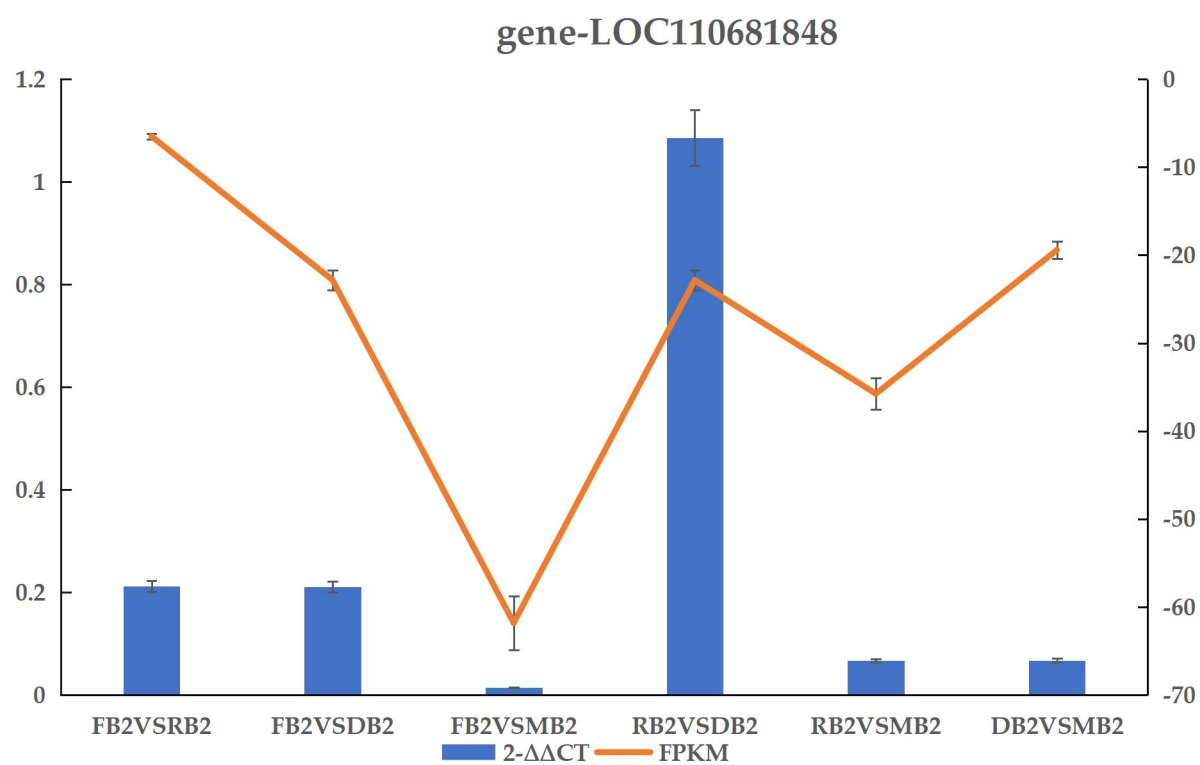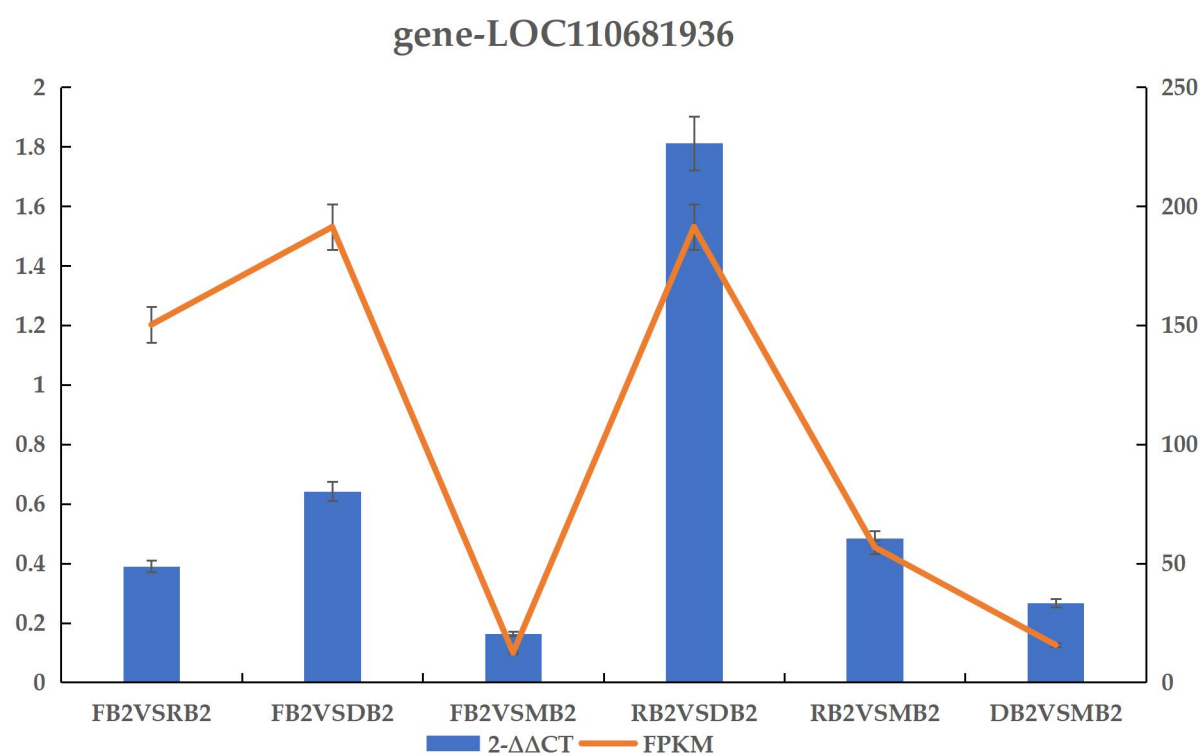

gene-LOC110682196

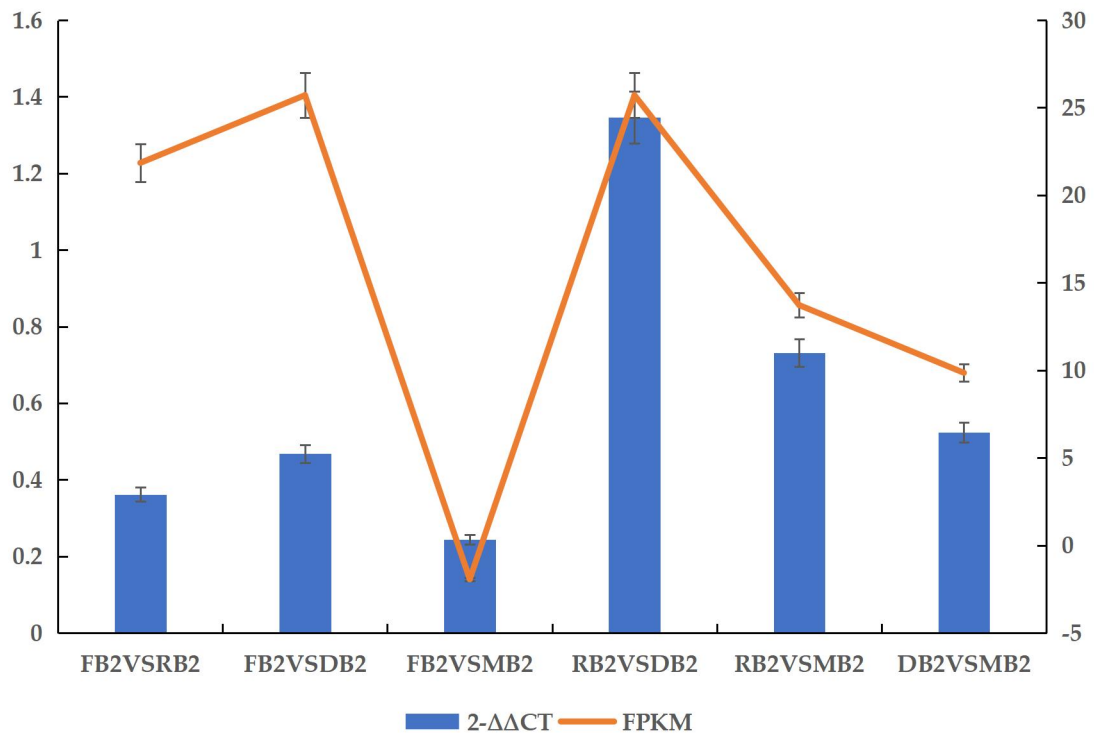

gene-LOC110682402

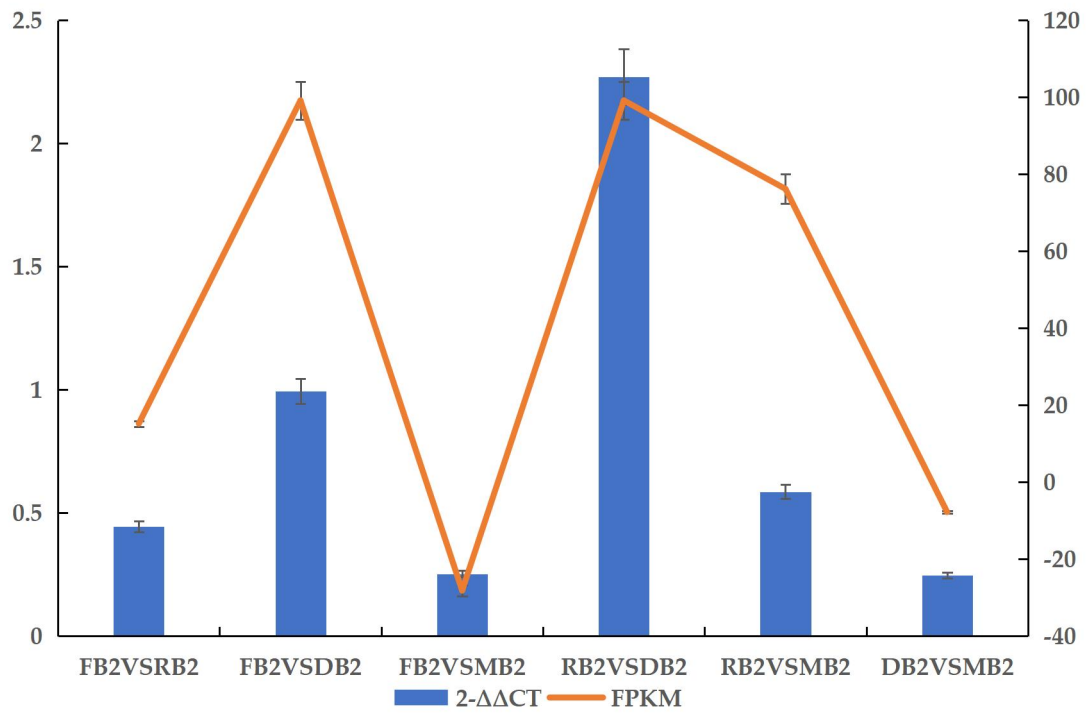

gene-LOC110696170

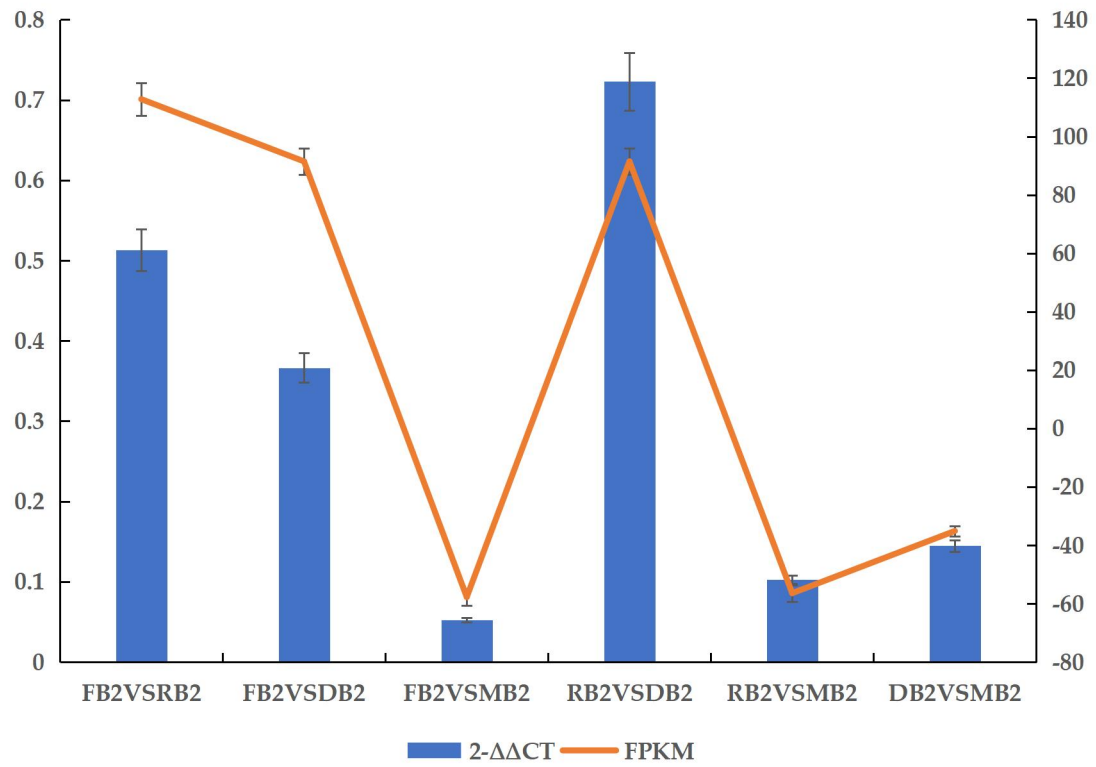

gene-LOC110702210

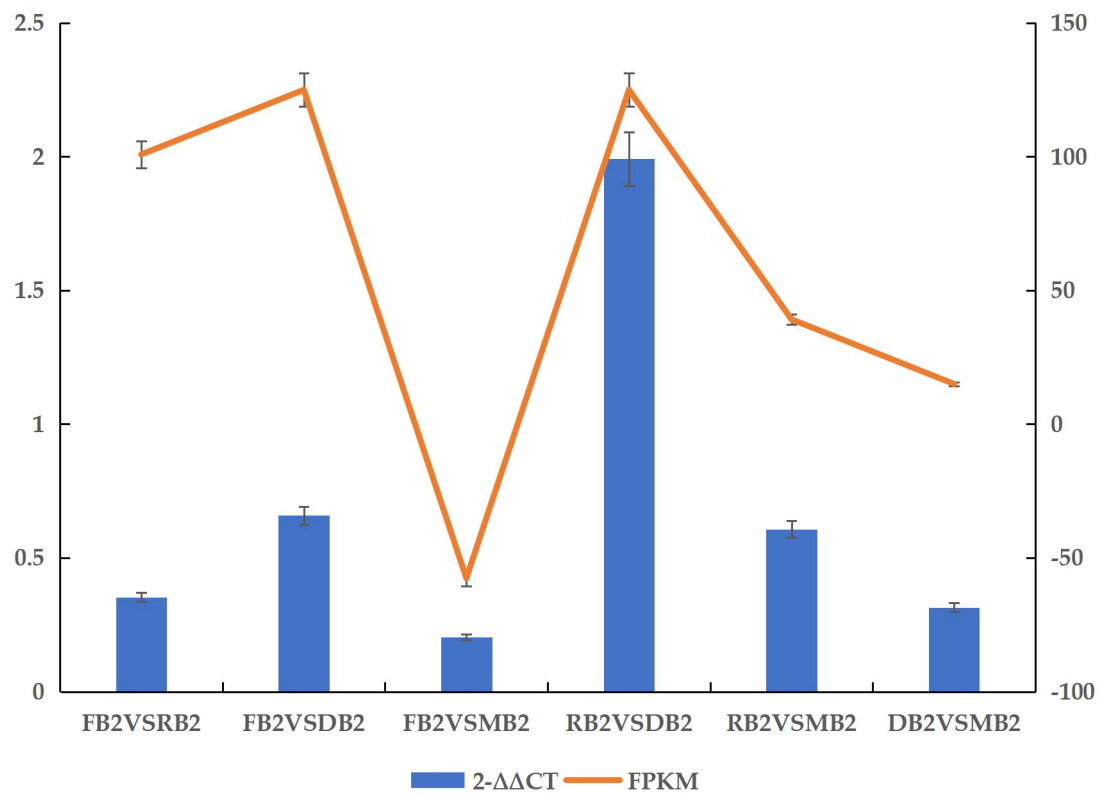

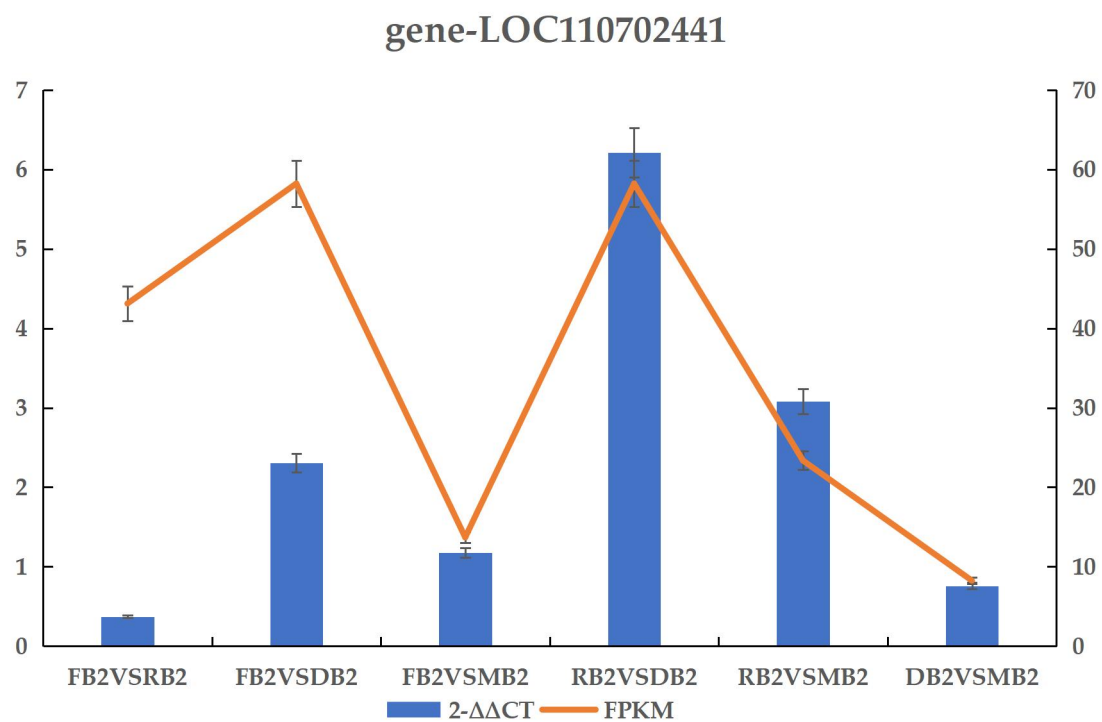

Figure S12. Comparison of RT-qPCR and RNA-Seq results. Histogram: RT-qPCR results. Broken-line diagram: RNA-Seq data. The ordinate represents the expression level. The abscissa represents different groups.
