# Supplementary material for: Integrative Analysis of the Metabolome and Transcriptome Provides Insights into the Mechanisms of Flavonoid Biosynthesis in Quinoa Seeds at Different Developmental Stages
Source: Metabolites. 2022 Sep 22;12(10):887. doi: 10.3390/metabo12100887 (PMC9609036; doi:10.3390/metabo12100887)
Supplement: Supplementary file 1 [file metabolites-12-00887-s001.zip]

Archive with 26 entries (26 files):
- Figure.S1.pdf
- Figure.S10.pdf
- Figure.S11.pdf
- Figure.S12.pdf
- Figure.S2.pdf
- Figure.S3.pdf
- Figure.S4.pdf
- Figure.S5.pdf
- Figure.S6.pdf
- Figure.S7.pdf
- Figure.S8.pdf
- Figure.S9.pdf
- Table.S1.xlsx
- Table.S10.xlsx
- Table.S11.xlsx
- Table.S12.xlsx
- Table.S13.xlsx
- Table.S14.xls
- Table.S2.xlsx
- Table.S3.xlsx
- Table.S4.xlsx
- Table.S5.xlsx
- Table.S6.xlsx
- Table.S7.xlsx
- Table.S8.xlsx
- Table.S9.xlsx
