# Supplementary material for: Integrative Analysis of the Metabolome and Transcriptome Provides Insights into the Mechanisms of Flavonoid Biosynthesis in Quinoa Seeds at Different Developmental Stages
Source: Metabolites. 2022 Sep 22;12(10):887. doi: 10.3390/metabo12100887 (PMC9609036; doi:10.3390/metabo12100887)
Supplement: Supplementary file 1 [file metabolites-12-00887-s001.zip › Table.S1.xlsx]

## Sheet: Sheet1
Table S1. Flavonoids related metabolites during grain development of quinoa
Index	Rt (min)	Q1 (Da)	Q3 (Da)	Molecular Weight (Da)	Formula	Ionization model	Compounds	Class I	Class II	CAS	Level	FB2-1	FB2-2	FB2-3	RB2-1	RB2-2	RB2-3	DB2-1	DB2-2	DB2-3	MB2-1	MB2-2	MB2-3	mix01	mix02	mix03	mix04	mix05	mix06	mix07	mix08	cpd_ID	kegg_map
MWSHY0124	6.94	257.08	153.02	256.074	C15H12O4	[M+H]+	Pinocembrin (Dihydrochrysin)	Flavonoids	Flavanones	480-39-7	1	164030	247770	327580	79991	68308	53070	17947	19027	30533	15199	45057	17793	62114	58794	61508	66820	58383	66203	55588	66903	C09827	ko00941
pme0376	5.53	271.06	151	272.068	C15H12O5	[M-H]-	Naringenin (5,7,4'-Trihydroxyflavanone)*	Flavonoids	Flavanones	480-41-1	3	210000	181550	215180	100090	104350	80166	54780	72829	72254	35353	47307	39553	70593	64190	71774	73262	71311	77082	73151	82367	C00509	ko00941,ko00943,ko01100,ko01110
mws0914	5.54	271.06	151	272.068	C15H12O5	[M-H]-	3,5,7-Trihydroxyflavanone (Pinobanksin)*	Flavonoids	Flavanonols	548-82-3	3	229210	211610	220510	99625	127220	93408	67138	75738	84726	39567	49272	56883	69464	70932	84892	89446	89503	80751	86823	101310	C09826	ko00941
pme1201	5.46	273.08	167	274.084	C15H14O5	[M-H]-	Phloretin	Flavonoids	Chalcones	60-82-2	3	196810	170030	163030	7439.6	6861.5	9297.2	4523.3	4842.8	4987.4	5820.9	6204.1	4102.6	31507	26339	26134	36484	38887	35329	29703	35973	C00774	ko00941,ko01110
mws0129	7.05	285.08	270	284.068	C16H12O5	[M+H]+	Genkwanin (Apigenin 7-methyl ether)	Flavonoids	Flavones	437-64-9	2	193810	160810	146730	180320	108540	98871	158300	65504	545710	180150	348970	176910	251170	271580	262820	281280	286710	268040	277710	283080	C10046	--
mws0051	7.06	285.08	270	284.068	C16H12O5	[M+H]+	Acacetin	Flavonoids	Flavones	480-44-4	2	208800	152360	144950	181110	108150	96448	164500	61406	576650	176030	361720	178440	253400	245410	282980	277150	254410	248590	278500	269410	C01470	ko00944
MWSHY0145	4.98	289.07	153.02	288.063	C15H12O6	[M+H]+	Eriodictyol (5,7,3',4'-Tetrahydroxyflavanone)	Flavonoids	Flavanones	552-58-9	3	125230	93745	102610	134020	125720	96920	54266	51606	60185	19813	16498	16099	47638	54070	47866	49799	39392	48253	53761	44096	C05631	ko00941,ko01100,ko01110
MWSHY0163	4.57	289.07	215.07	288.063	C15H12O6	[M+H]+	Aromadendrin (Dihydrokaempferol)	Flavonoids	Flavanonols	480-20-6	3	119930	83248	124000	53925	55598	60718	80030	79173	62236	28568	36814	30122	45981	51630	60433	54822	68576	62108	59755	54552	C00974	ko00941,ko01100,ko01110
MWSHY0065	3.29	291.09	139.04	290.079	C15H14O6	[M+H]+	Catechin	Flavonoids	Flavanols	154-23-4	1	9	103850000	9	20438000	17568000	16806000	4695100	5452200	3823300	490160	407470	394770	37877000	38188000	41094000	41630000	38587000	35997000	37689000	36913000	C06562	ko00941,ko01110
mws0058	5.67	299.06	284	300.063	C16H12O6	[M-H]-	Diosmetin (5,7,3'-Trihydroxy-4'-methoxyflavone)	Flavonoids	Flavones	520-34-3	3	9	9	9	9124	31247	11975	4104.1	15118	6776	2705.4	2557.6	3952	9647.1	10550	11599	5676	11629	12457	8592.9	5224.6	C10038	--
Zmhp002814	4.59	301.07	286.05	300.063	C16H12O6	[M+H]+	5,7,8-Tetrahydroxy-6-methoxyflavone	Flavonoids	Flavones	-	3	64121	63584	56525	9	9	9	9	9	9	9	9	9	18630	17066	18001	18694	23058	20718	29735	20787	--	--
Zmhp002714	4.59	301.07	286.05	300.063	C16H12O6	[M+H]+	5,6,7-Tetrahydroxy-8-methoxyflavone	Flavonoids	Flavones	-	3	64121	63584	56525	9	9	9	9	9	9	9	9	9	18630	17066	18001	18694	23058	20718	29735	20787	--	--
pmp000001	5.66	301.07	286.05	300.063	C16H12O6	[M+H]+	Hispidulin (5,7,4'-Trihydroxy-6-methoxyflavone)	Flavonoids	Flavones	1447-88-7	3	54668	32063	33251	29056	134100	21153	10124	38609	8544	8483.8	9030.8	18116	34076	32500	34568	34025	30380	33840	33752	29028	C10058	--
pmc1990	6.66	299.1	223.1	300.1	C17H16O5	[M-H]-	4'-Hydroxy-5,7-dimethoxyflavanone	Flavonoids	Flavanones	-	3	367780	345860	407080	642120	682430	689480	698060	902460	874170	450400	583020	501340	581080	532030	671610	614540	658190	684810	616190	592690	--	--
pme2954	5.04	303.05	137.02	302.043	C15H10O7	[M+H]+	Quercetin	Flavonoids	Flavonols	117-39-5	1	777690	727040	528380	47963	57544	44829	28952	26717	27920	23036	12308	15993	94668	104720	100450	111850	107530	97795	109510	96463	C00389	ko00941,ko00944,ko01100,ko01110
MWSHY0049	5.65	303.09	177.05	302.079	C16H14O6	[M+H]+	Hesperetin	Flavonoids	Flavanones	520-33-2	3	9108.8	11043	11776	8640.1	6695	6121.3	9	9	9	9	9	9	7098.8	7710	9637.1	8461.1	6483.8	8966.5	6528.6	7171.8	C01709	ko00941
mws0044	4.08	303.05	125.02	304.058	C15H12O7	[M-H]-	Taxifolin(Dihydroquercetin)	Flavonoids	Flavanonols	480-18-2	2	5729400	5087000	7054000	444550	462810	492750	390920	434680	429990	161810	106220	156480	860010	924180	941530	1064700	1059400	984910	988800	994450	C01617	ko00941,ko01100,ko01110
mws0049	2.38	307.08	139.04	306.074	C15H14O7	[M+H]+	Gallocatechin	Flavonoids	Flavanols	970-73-0	3	155710	149160	153670	25375	19245	12535	15542	16677	9126.5	9	9	9	33417	47236	28981	40469	52743	40469	44687	51317	C12127	ko00941,ko01110
mws0042	2.36	305.07	125	306.074	C15H14O7	[M-H]-	Epigallocatechin	Flavonoids	Flavanols	970-74-1	3	3989900	3427000	4181300	356500	457950	386440	227980	192590	232030	8004.2	8260.7	11427	798580	941530	877030	903950	876560	925680	943850	919120	C12136	ko00941,ko01110
MWSHY0068	5.78	317.07	274.05	316.058	C16H12O7	[M+H]+	Isorhamnetin	Flavonoids	Flavonols	480-19-3	1	111230	73520	58757	1054.3	5376.5	2524.5	9	9	2295.8	9	9	9	8604.1	9292.2	8765.1	8971.6	11852	9847.1	7305.4	8355	C10084	--
Hmgp001996	3.86	319.05	273.04	318.039	C15H10O8	[M+H]+	Quercetagetin; 3,3',4',5,6,7-Hexahydroxyflavone	Flavonoids	Flavonols	90-18-6	3	9	9	9	23926	20300	22880	23920	23920	29401	8837.4	6787.1	18024	13648	14603	10641	7735.9	23926	8702.4	13642	19352	C10122	--
pmp000004	5.79	331.08	316.06	330.074	C17H14O7	[M+H]+	4',5,7-Trihydroxy-3',6-dimethoxyflavone (Jaceosidin)	Flavonoids	Flavones	18085-97-7	3	8112.6	3613.1	1264.3	4318.7	27348	5401	3423.3	9329.6	1433.9	5880.6	2161.9	6123.5	6288.4	7543.4	8257.8	6831.1	4124.5	5762.2	4857	7553.3	--	--
mws0917	6.52	329.07	314	330.074	C17H14O7	[M-H]-	3,7-Di-O-methylquercetin	Flavonoids	Flavonols	2068-02-2	3	20784	28057	7450.3	2278.6	2074.7	910.99	9	9	9	9	9	9	7117.5	5842.3	6914.7	4991.2	7197.7	7208.4	7484.4	6245	C01265	ko00944
mws0919	4.49	431.1	285	432.106	C21H20O10	[M-H]-	Kaempferol-3-O-rhamnoside (Afzelin)(Kaempferin)	Flavonoids	Flavonols	482-39-3	3	47967	55487	68257	25357	19104	38691	29158	18720	17954	5890.9	4900.3	2501.7	19101	23021	21306	16403	18348	17206	22629	22716	C16911	ko00944
MWSHY0100	3.97	435.09	303.06	434.085	C20H18O11	[M+H]+	Avicularin(Quercetin-3-O-α-L-arabinofuranoside)	Flavonoids	Flavonols	572-30-5	3	2208000	2383400	2447100	1727500	1739100	1954700	1513700	1397200	1566400	252170	258310	256830	1603700	1935800	1790200	1904300	2026800	1977800	1678500	1997400	--	--
Lmdp003509	3.97	435.09	303.06	434.085	C20H18O11	[M+H]+	Quercetin-3-O-xyloside (Reynoutrin)	Flavonoids	Flavonols	549-32-6	3	2343900	2567500	2642800	1762200	1976900	2107700	1393200	1518000	1523600	153630	150800	215570	1872500	2027700	1939600	1924600	2073400	2034100	1984800	2019600	--	--
mws1179	4.19	433.11	271	434.121	C21H22O10	[M-H]-	Naringenin-7-O-glucoside (Prunin)	Flavonoids	Flavanones	529-55-5	1	292230	310280	346600	139380	139090	132040	100230	94772	94213	85821	70963	69423	110700	139870	146800	147870	153990	159300	136160	154540	C09099	ko00941
HJN087	4.45	433.12	271.06	434.121	C21H22O10	[M-H]-	Naringenin-4'-O-glucoside	Flavonoids	Flavanones	-	1	518100	450840	559350	117410	118910	109370	52195	43934	55669	14993	19271	14384	110540	118670	127940	123330	111660	134250	130070	125210	--	--
mws2118	4.34	435.13	166.7	436.137	C21H24O10	[M-H]-	Phloretin-2'-O-glucoside (Phlorizin)	Flavonoids	Chalcones	60-81-1	1	359410	675280	646170	93341	92772	66386	47537	47917	41145	26171	24879	24432	167140	176710	192020	242720	253230	173230	208460	244520	C01604	ko00941,ko01110
pmp000575	4.9	447.13	285.18	446.121	C22H22O10	[M+H]+	Acacetin-7-O-glucoside (Tilianin)*	Flavonoids	Flavones	4291-60-5	3	56907	72002	45862	27780	16382	26368	34551	17329	32664	91075	97438	90583	38717	32347	51190	45936	45538	58686	45109	43480	--	--
pmp000573	4.91	447.13	285.08	446.121	C22H22O10	[M+H]+	Acacetin-7-O-galactoside*	Flavonoids	Flavones	-	3	57585	65513	73688	25018	16612	36196	28871	17619	33121	88195	126550	72139	22451	64539	43505	36988	50618	50087	59324	56844	--	--
Hmcp002316	4.34	449.11	317.06	448.1	C21H20O11	[M+H]+	Isorhamnetin-3-O-arabinoside	Flavonoids	Flavonols	-	3	310260	476220	368300	116360	120190	137540	87595	87355	110240	39082	42644	19433	196550	191010	187570	199760	187090	190380	185090	180530	--	--
MWSHY0016	3.5	449.11	299.06	448.101	C21H20O11	[M+H]+	Luteolin-6-C-glucoside (Isoorientin)	Flavonoids	Flavonoid carbonoside	4261-42-1	3	16168	9	9903.6	24765	20003	42865	26857	27959	22012	18354	59609	21555	38530	22498	29181	9305.6	32192	28431	23859	43759	C01821	--
mws0045	4.29	449.11	303.05	448.101	C21H20O11	[M+H]+	Quercetin-3-O-rhamnoside(Quercitrin)	Flavonoids	Flavonols	522-12-3	1	1047600	1093000	1126100	608500	563370	608610	414480	290640	436710	31399	28080	60042	304680	399750	405970	402580	393900	432370	379400	395750	C01750	ko00944
MWS20150	3.73	449.11	287.07	448.101	C21H20O11	[M+H]+	Luteolin-7-O-glucoside (Cynaroside)	Flavonoids	Flavones	5373-11-5	3	355600	301760	274510	335840	404220	570920	205080	293610	225980	290590	239780	226950	682990	574490	669450	796440	719330	526890	477620	604960	C03951	ko00944
Lmlp003531	4.06	449.11	287.06	448.101	C21H20O11	[M+H]+	Luteolin-3'-O-glucoside	Flavonoids	Flavones	-	1	381680	1468600	1188700	675950	641840	148240	448090	445410	523600	155320	152640	70266	688840	757810	771960	724210	690610	823730	814930	798520	--	--
mws0057	3.5	451.12	289.07	450.116	C21H22O11	[M+H]+	Eriodictyol-7-O-glucoside	Flavonoids	Flavanones	38965-51-4	3	24771	26597	41936	155590	175260	196240	174240	205830	161180	139950	244050	246340	153230	153900	154080	185290	261380	150400	114690	232440	--	--
HJN086	4.23	449.11	287.06	450.116	C21H22O11	[M-H]-	Eriodictyol-3'-O-glucoside	Flavonoids	Flavanones	-	1	322600	347580	403650	627920	641900	579690	452520	478810	454510	593800	559970	627160	409900	418830	398610	464990	450480	393870	444920	432630	--	--
Lmtn002796	3.29	449.11	287.06	450.116	C21H22O11	[M-H]-	Aromadendrin-7-O-glucoside	Flavonoids	Flavanonols	28189-90-4	3	1381700	1574600	1500900	628620	607980	635700	116830	123330	124450	41136	48679	52726	313020	312320	389220	374790	364370	305850	383020	408390	--	--
Lmsp004301	3.5	451.12	289.07	450.116	C21H22O11	[M+H]+	3',5,5',7-Tetrahydroxyflavanone-7-O-glucoside	Flavonoids	Flavanones	-	3	37601	59611	33951	335630	177780	324800	212000	442560	248320	306370	259960	213620	232130	124880	253230	186100	240330	380460	143490	310830	--	--
HJN041	2.76	451.12	289.07	452.131	C21H24O11	[M-H]-	Epicatechin glucoside	Flavonoids	Flavanols	-	3	7784100	5703200	7240800	1875600	1856900	1925000	1001600	1253100	1032100	1031300	1047900	1162300	1208000	1484700	1536800	1541600	1567700	1524100	1533000	1681000	--	--
Hmpn005101	4.01	451.12	289.07	452.131	C21H24O11	[M-H]-	Sieboldin	Flavonoids	Chalcones	18777-73-6	3	37601	59611	33951	335630	177780	324800	212000	442560	248320	306370	259960	213620	232130	124880	253230	186100	240330	380460	143490	310830	--	--
MWSHY0094	3.27	459.09	139.04	458.085	C22H18O11	[M+H]+	Gallocatechin gallate*	Flavonoids	Flavanols	4233-96-9	2	3207.2	10377	13631	9	84668	6371.7	802.79	3189.8	3203.8	2398.8	2389	7186.8	8762.4	11961	9598.8	4791.2	5566.3	8819.7	8781.2	7202.5	--	--
MWSHY0060	3.29	459.09	139.04	458.085	C22H18O11	[M+H]+	Epigallocatechin-3-gallate*	Flavonoids	Flavanols	989-51-5	2	3207.2	10377	13631	9	84668	6371.7	802.79	3189.8	3203.8	2398.8	2389	7186.8	8762.4	11961	9598.8	4791.2	5566.3	8819.7	8781.2	7202.5	C09731	--
Lmzn001894	4.04	461.07	285.04	462.08	C21H18O12	[M-H]-	Kaempferol-3-O-glucuronide	Flavonoids	Flavonols	22688-78-4	1	44078000	44595000	49812000	25562000	26396000	27001000	16210000	16265000	14872000	1602000	1542600	1643900	25100000	24681000	27381000	27355000	26808000	27723000	24523000	29636000	--	--
Lmmp003767	4.17	463.09	287.05	462.08	C21H18O12	[M+H]+	Kaempferol-7-O-glucuronide	Flavonoids	Flavonols	-	2	7092100	7202100	5779000	2916800	2548600	3341000	1877500	1525900	1738100	9	9	124240	3031300	2596200	2965400	2804900	2423000	2275100	2623400	2072300	--	--
MWSHY0121	4.06	463.09	287.06	462.08	C21H18O12	[M+H]+	Luteolin-7-O-glucuronide	Flavonoids	Flavones	29741-10-4	1	54720000	57709000	53729000	31068000	30080000	32305000	19842000	19089000	20501000	2050800	1842900	1993100	31446000	32791000	35514000	37013000	34596000	33050000	32019000	35955000	C03515	ko00944
pmp000233	3.83	463.12	313.07	462.116	C22H22O11	[M+H]+	Swertiajaponin	Flavonoids	Flavonoid carbonoside	6980-25-2	3	228760	246540	290260	489190	479460	498930	460530	424980	497020	369850	419060	419110	379310	464420	427000	469350	446530	359900	443710	419860	C10187	--
pmp000579	4.23	463.12	301.07	462.116	C22H22O11	[M+H]+	Diosmetin-7-O-galactoside*	Flavonoids	Flavones	-	1	2123900	3079700	1911700	9026800	5281200	8797800	10288000	6783800	10468000	6188100	6310600	3792900	4902100	4128700	6622600	9192400	5771200	4817800	6949800	4671900	--	--
Hmmp004965	4.24	463.12	301.07	462.116	C22H22O11	[M+H]+	Diosmetin-7-O-glucoside*	Flavonoids	Flavones	20126-59-4	1	2123900	3079700	1911700	9026800	5281200	8797800	10288000	6783800	10468000	6188100	6310600	3792900	4902100	4128700	6622600	9192400	5771200	4817800	6949800	4671900	--	--
Hmcp002539	4.62	463.12	317.06	462.116	C22H22O11	[M+H]+	Isorhamnetin-3-O-rhamnoside	Flavonoids	Flavonols	-	3	184860	363850	313530	143000	107810	136780	77910	84317	92318	27964	23785	21038	166690	187130	189490	199140	191560	165350	185670	162050	--	--
Lmdp003286	3.8	465.1	303.06	464.095	C21H20O12	[M+H]+	Isohyperoside	Flavonoids	Flavonols	35589-21-0	3	14615000	11056000	10408000	21731000	19295000	24524000	18888000	21549000	18386000	4421500	4125700	3902800	26502000	23060000	28636000	18927000	28617000	26311000	33772000	29200000	--	--
Hmcn001884	3.82	463.09	301.03	464.096	C21H20O12	[M-H]-	6-Hydroxyluteolin 5-glucoside	Flavonoids	Flavones	-	2	9	9	9	5706900	5777200	7036300	6904800	5976000	5945900	1655900	1135400	1216700	6324700	7515600	6704400	7937700	6800600	7229900	7176500	8071700	--	--
mws0856	3.82	463.09	301	464.096	C21H20O12	[M-H]-	Quercetin-4'-O-glucoside (Spiraeoside)	Flavonoids	Flavonols	20229-56-5	1	2818200	2328000	2298200	5703000	5594800	6314800	5592600	5635100	6226000	1388000	1283400	1365800	6733300	6430900	7430200	7481000	7593400	7045100	8535000	8336800	--	--
mws1329	3.81	463.09	301.04	464.096	C21H20O12	[M-H]-	Quercetin-7-O-glucoside*	Flavonoids	Flavonols	491-50-9	1	2842300	2127500	2598600	5223300	6336300	4807200	5490800	5688400	6142300	1322300	1278500	1195200	7274500	6780100	7300900	7446900	7538900	7226900	7173900	8636400	C12639	--
MWSHY0046	3.83	465.1	303.05	464.096	C21H20O12	[M+H]+	Quercetin-3-O-glucoside (Isoquercitrin)*	Flavonoids	Flavonols	482-35-9	1	15086000	13523000	14468000	20119000	21595000	18821000	16351000	23534000	14393000	3876600	3266100	3675600	29810000	27395000	30682000	21451000	27053000	30109000	27864000	30423000	C05623	ko00944,ko01100,ko01110
MWSHY0113	3.83	465.1	303.06	464.096	C21H20O12	[M+H]+	Quercetin-3-O-galactoside (Hyperin)*	Flavonoids	Flavonols	482-36-0	1	15103000	12404000	11439000	17396000	25167000	18266000	16811000	22021000	15732000	3561700	2747800	3617700	27467000	33809000	26207000	21826000	26656000	32217000	25886000	32415000	C10073	--
pme1598	3.82	463.12	301	464.132	C22H24O11	[M-H]-	Hesperetin-5-O-glucoside	Flavonoids	Flavanones	69651-80-5	3	3166800	3915000	2183700	5722100	5720800	5943900	6679400	6209600	7074500	1664500	1804200	1294700	8652900	6786100	7901200	8220200	8188600	7008300	6971600	9529000	--	--
Xmsn002700	3.83	465.13	303.05	466.111	C21H22O12	[M-H]-	Taxifolin-3'-O-glucoside	Flavonoids	Flavanonols	31106-05-5	3	110350	38004	38343	153690	168140	182210	219750	230040	219580	44842	42829	51007	250660	204060	226630	259240	236100	241340	218580	278150	--	--
pmp000583	4.22	477.1	301.07	476.096	C22H20O12	[M+H]+	Diosmetin-7-O-glucuronide	Flavonoids	Flavones	35110-20-4	3	5157300	3977800	8917900	5769000	6137100	7183700	2321200	3958600	2032700	1056100	1002400	1187300	3371500	3371400	3254500	3993700	6924200	3050600	3913300	3137500	--	--
Lmqp003647	3.87	479.08	303.05	478.075	C21H18O13	[M+H]+	Herbacetin-3-O-glucuronide	Flavonoids	Flavonols	-	1	11635000	10175000	11298000	7223100	7514700	7815200	5405800	4936000	4898300	654820	585610	599640	7455200	6656400	6970500	8506500	6479200	7413000	7613700	6976500	--	--
Lmfn003760	3.83	477.07	301.04	478.075	C21H18O13	[M-H]-	Quercetin-4'-O-glucuronide	Flavonoids	Flavonols	201463-36-7	1	7027600	6351600	6933500	3576000	3958100	4119000	2479100	3120000	2851900	284960	356840	273230	4395100	4583100	4560400	5191000	4810000	4593000	4494600	4285800	--	--
Lmjp003044	4.11	479.12	317.06	478.111	C22H22O12	[M+H]+	Isorhamnetin-3-O-Glucoside*	Flavonoids	Flavonols	5041-82-7	1	5258000	6356300	4160600	3158700	2350400	3454500	2342100	2114000	2158200	678550	567400	573140	6659500	6917100	6906700	6910700	7480000	7407400	7906800	7578700	--	--
Hmcp002207	4.11	479.12	317.06	478.111	C22H22O12	[M+H]+	Isorhamnetin-7-O-glucoside (Brassicin)*	Flavonoids	Flavonols	6743-96-0	1	4499400	6540800	3996600	2901500	2038500	3176000	2317600	2007500	2175100	667530	637920	557580	7086300	6859500	7483200	7254300	6804700	7010600	7235000	7001800	--	--
Hmgp002036	4.11	479.12	317.06	478.112	C22H22O12	[M+H]+	Nepetin-7-O-glucoside(Nepitrin)	Flavonoids	Flavones	569-90-4	1	4498400	5246900	3734600	2600200	2236300	3194100	2194100	1916700	1930300	600680	530420	528190	6213700	5797300	6727700	6691400	6536700	6549700	6372300	5680200	--	--
Lmmn003398	4.41	489.11	285.04	490.111	C23H22O12	[M-H]-	Kaempferol-3-O-(6''-O-acetyl)glucoside	Flavonoids	Flavonols	-	3	185050	230510	238440	89405	75050	83322	39594	21445	34713	23889	19560	15596	45672	33565	60476	51567	38876	53923	51781	65044	--	--
pmb0736	4.28	493.13	331.08	492.127	C23H24O12	[M+H]+	Tricin-7-O-Glucoside	Flavonoids	Flavones	32769-01-0	3	70499	53933	49007	47098	43138	15879	9	32376	41726	19386	9	9	37482	47564	12707	47795	49007	39568	36694	43164	--	--
pmn001642	4.55	503.08	459.1	504.09	C23H20O13	[M-H]-	Kaempferol-3-O-(2''-O-acetyl)glucuronide	Flavonoids	Flavonols	-	3	58789	74857	61975	30693	30134	25337	9	9	9	9	9	9	50903	57443	74827	55777	73356	69762	81943	56132	--	--
HJAP135	5.37	505.12	257.08	504.126	C24H24O12	[M+H]+	Pinocembrin-7-O-(6''-O-malonyl)glucoside	Flavonoids	Flavanones	-	1	899970	885160	872120	649290	619020	706880	827530	800420	916940	616710	665320	703940	1047600	1031900	1066000	1167600	998760	1130600	961510	1133300	--	--
Hmln002199	3.97	505.1	300.03	506.107	C23H22O13	[M-H]-	Quercetin-3-O-(6''-O-acetyl)galactoside	Flavonoids	Flavonols	-	3	32147	49493	67475	157800	195850	418150	384740	209560	228000	60239	49175	49822	92973	129320	137330	149810	135950	126460	177520	111360	--	--
HJAP006	4.14	509.13	347.08	508.122	C23H24O13	[M+H]+	Syringetin-7-O-glucoside	Flavonoids	Flavonols	-	3	29655	25496	32945	6984.2	9	9	9	7538	9	9	3353	9	18365	26298	9837.3	18594	23042	29161	34853	22949	--	--
pmn001644	4.05	519.08	300	520.085	C23H20O14	[M-H]-	Quercetin-3-O-(2''-O-acetyl)glucuronide	Flavonoids	Flavonols	-	3	19384	12667	37932	9	9	9	9	9	9	9	9	9	9602.1	7424.9	5974.8	10441	11188	13455	7440.9	8188.5	--	--
Li512111	4.3	519.11	315.05	520.122	C24H24O13	[M-H]-	Isorhamnetin-3-O-(6''-acetylglucoside)	Flavonoids	Flavonols	-	3	51616	63728	35733	25032	33169	49104	20792	32264	30442	25382	9820.6	10323	17222	31879	35959	23113	36558	26857	33975	21397	--	--
pmp000587	4.26	535.11	287.05	534.101	C24H22O14	[M+H]+	Luteolin-7-O-(6''-malonyl)glucoside	Flavonoids	Flavones	-	2	262950	214900	198710	255220	249170	212330	209500	132280	175900	122430	141070	156810	143180	165790	176930	192660	149360	179840	164620	137580	C10103	--
Lmdp004892	4.26	535.11	287.05	534.101	C24H22O14	[M+H]+	Kaempferol-3-O-(6''-malonyl)galactoside	Flavonoids	Flavonols	-	2	201600	349170	182870	212330	267340	279780	251730	271700	228710	155180	135910	182670	180150	222980	184120	220120	224450	243490	211510	230600	--	--
pmb0608	4.57	549.12	301.4	548.117	C25H24O14	[M+H]+	Chrysoeriol-7-O-(6''-malonyl)glucoside	Flavonoids	Flavones	-	3	158750	160190	179590	59938	29652	32690	34129	22794	31840	9	9	9	36185	48452	44435	33392	42816	32602	58136	32573	--	--
pmp000589	3.98	551.1	303.05	550.096	C24H22O15	[M+H]+	Quercetin-7-O-(6''-malonyl)glucoside	Flavonoids	Flavonols	-	1	443800	335760	354380	1222600	983030	1377500	1401100	1444400	1019300	397640	380300	285870	499390	517820	614030	559340	510360	576150	475030	575700	--	--
pmb3114	3.4	561.14	289.2	562.148	C30H26O11	[M-H]-	Epicatechin-epiafzelechin	Flavonoids	Flavanols	-	3	126450	129320	110110	14621	9897.5	16964	6460.5	6478.2	11693	5896.1	4030.5	4016.8	23543	10199	12870	33691	20933	29132	28124	23396	--	--
HJAP064	4.36	565.12	317.08	564.088	C25H24O15	[M+H]+	Isorhamnetin-3-O-(6''-malonyl)glucoside	Flavonoids	Flavonols	-	2	170590	222690	154510	428620	395550	366080	588010	608500	557750	481610	421210	483160	275720	311590	297670	280480	324610	293810	317100	316050	--	--
Lmmp003306	3.84	567.13	303.05	566.127	C25H26O15	[M+H]+	Quercetin-3-O-xylosyl(1→2)arabinoside	Flavonoids	Flavonols	-	1	38928	42693	51206	202740	156940	231580	267540	235730	255910	214120	217030	183110	113860	179710	139290	221130	143300	117780	140360	180480	--	--
pmp000237	3.73	579.13	283.06	578.127	C26H26O15	[M+H]+	Apigenin-6-C-(2''-glucuronyl)xyloside	Flavonoids	Flavonoid carbonoside	-	3	873080	1036400	901750	95861	148350	73150	16146	12041	19172	18987	9	8101.4	333450	424900	287990	249500	423830	338020	381650	330260	--	--
MWSHY0201	3.71	579.17	287.06	578.164	C27H30O14	[M+H]+	Kaempferol-3,7-O-dirhamnoside (Kaempferitrin)	Flavonoids	Flavonols	482-38-2	2	3180000	2787100	4213200	375630	481590	329950	58514	69386	82724	14069	18105	27155	1495500	1172100	1522400	1247100	1522700	1536600	1444200	1055600	C16981	--
HJAP148	3.77	581.15	287.06	580.142	C26H28O15	[M+H]+	Kaempferol-3-O-sambubioside	Flavonoids	Flavonols	27661-51-4	2	188010	215150	225210	291860	284500	285750	144750	180850	229850	106030	87933	130740	366620	392010	424720	402650	348590	377010	389220	339570	--	--
mws0046	4.06	579.17	271.06	580.179	C27H32O14	[M-H]-	Naringenin-7-O-Neohesperidoside(Naringin)	Flavonoids	Flavanones	10236-47-2	3	17191	54365	56289	65595	63798	77531	71047	67634	65595	95258	81600	72303	54155	45772	34291	52179	71563	46166	50596	59739	C09789	ko00941
MWSHY0056	4.05	581.19	273.08	580.179	C27H32O14	[M+H]+	Naringenin-7-O-Rutinoside(Narirutin)	Flavonoids	Flavanones	14259-46-2	3	24308	14111	9982.4	17944	27223	25346	34987	23326	48986	35805	36801	32314	16150	20178	11665	17010	28882	16336	11665	21779	C09793	--
Lmfp005436	5.86	587.1	303.09	586.096	C27H22O15	[M+H]+	Quercetin-3-O-(2''-O-galloyl)Arabinoside	Flavonoids	Flavonols	-	3	8132.1	6854.7	7363.2	7405.1	7364.9	9017.2	7927.2	6254.4	7724.8	3524.3	3129.5	6627.8	8688.1	7908.7	10316	10665	10301	9009.4	11216	9403.7	--	--
Hmgp003641	4.65	593.18	447.13	592.177	C28H32O14	[M+H]+	Chrysoeriol-6-C-rhamnoside-7-O-rhamnoside	Flavonoids	Flavonoid carbonoside	-	3	18309	16468	4344	14622	10423	3820	23952	11827	27549	10788	17166	18310	15624	12879	22456	9973.8	12322	11714	12591	17826	--	--
pmp001288	4.65	593.19	285.1	592.179	C28H32O14	[M+H]+	Acacetin-7-O-rutinoside (Linarin)	Flavonoids	Flavones	480-36-4	1	339440	352350	366120	280620	204260	183550	635620	285270	874600	215780	350720	319840	302300	287310	290460	333110	325070	318780	320230	306650	--	--
pmb2586	3.74	593.13	285.6	594.137	C30H26O13	[M-H]-	Gallocatechin-(4α→8)-catechin	Flavonoids	Flavanols	-	3	12855	17092	23480	14090	9912.1	18318	5710.9	6374.2	9283.4	4246.8	1369.6	2852.3	9154	7795	9972.3	14088	10570	12706	7874.8	5637.5	--	--
Hmcp001829	3.33	595.16	303.04	594.158	C27H30O15	[M+H]+	Quercetin-3,7-Di-O-rhamnoside	Flavonoids	Flavonols	28638-13-3	3	82200	46533	46020	55705	108700	92524	90812	93442	51411	97396	81352	72460	83012	87574	73972	57138	74803	75692	113050	80854	--	--
Zmjp003291	3.48	595.17	433.12	594.158	C27H30O15	[M+H]+	Vitexin-2''-O-galactoside	Flavonoids	Flavonoid carbonoside	-	3	7343.5	12768	9093	64365	73122	83672	43767	47260	66030	67899	63824	37386	52884	42427	70206	43116	60696	49228	51384	39082	--	--
Lmnp002413	3.49	595.17	449.11	594.159	C27H30O15	[M+H]+	Luteolin-6-C-glucoside-7-O-rhamnoside	Flavonoids	Flavonoid carbonoside	-	3	173220	126550	182660	850980	785860	925670	948990	1002100	958630	802130	819170	642050	848770	742880	870650	578650	800890	798480	554020	884160	--	--
MWSHY0061	3.77	595.16	287.06	594.159	C27H30O15	[M+H]+	Kaempferol-3-O-neohesperidoside*	Flavonoids	Flavonols	32602-81-6	3	1075500	9	797380	9	4723900	9	7304900	5203400	7321400	3660500	3597200	3634300	4806100	2894900	4102300	5327600	4658500	3721500	4056800	3749800	--	--
MWSHY0050	3.77	595.17	287.05	594.159	C27H30O15	[M+H]+	Kaempferol-3-O-rutinoside(Nicotiflorin)*	Flavonoids	Flavonols	17650-84-9	3	3566000	5494300	3849500	3681000	3223000	3671800	1631900	1363700	1673900	762750	794780	694580	2726900	2662600	2889800	2905500	2528700	2263100	2625700	2528800	C21833	ko00944,ko01110
pmp000593	3.49	595.17	287.05	594.159	C27H30O15	[M+H]+	Luteolin-7-O-rutinoside*	Flavonoids	Flavones	3563-98-2	3	4880100	5019800	4734600	24193000	24325000	27350000	20252000	24544000	22921000	20487000	22139000	24353000	17593000	23211000	22695000	20400000	22526000	19164000	25644000	21312000	--	--
MWSslk146	3.5	595.17	433.12	594.159	C27H30O15	[M+H]+	4'-O-Glucosylvitexin	Flavonoids	Flavonoid carbonoside	38950-94-6	3	7343.5	12768	9093	64365	73122	83672	43767	47260	66030	67899	63824	37386	52884	42427	70206	43116	60696	49228	51384	39082	--	--
Lmtp004044	3.58	597.14	303.04	596.138	C26H28O16	[M+H]+	Quercetin-3-O-apiosyl(1→2)galactoside*	Flavonoids	Flavonols	-	3	664930	473950	822050	16154000	16443000	18480000	24265000	19158000	19432000	15420000	14426000	9305600	15220000	18508000	18882000	16940000	14768000	16688000	17454000	15054000	--	--
Lmjp002596	3.58	597.14	303.05	596.138	C26H28O16	[M+H]+	Quercetin-3-O-sambubioside*	Flavonoids	Flavonols	83048-35-5	3	759920	594560	782170	17368000	16273000	20082000	18750000	19668000	18155000	14716000	12259000	15543000	15860000	16382000	18131000	19662000	14226000	17142000	16644000	16189000	C12637	ko00944
MWSHY0092	3.48	597.18	289.07	596.174	C27H32O15	[M+H]+	Eriodictyol-7-O-Rutinoside (Eriocitrin)	Flavonoids	Flavanones	13463-28-0	3	241600	121270	148640	946960	615400	913640	854550	802130	809570	741940	798630	436330	729340	631680	738460	709040	710200	792100	731160	577970	C09732	--
Hmjp003008	3.66	609.14	287.06	608.138	C27H28O16	[M+H]+	Luteolin-7-O-glucuronide-5-O-rhamnoside	Flavonoids	Flavones	-	3	171620	183750	190800	258950	326070	243780	189840	156220	177020	169600	135570	131620	294520	230170	338190	379420	361690	239770	299400	357730	--	--
MWSslk165	4.11	609.18	301.08	608.174	C28H32O15	[M+H]+	Diosmetin-7-O-Neohesperidoside (Neodiosmin)	Flavonoids	Flavones	38665-01-9	2	765870	695570	546030	599860	351200	677620	625680	328990	477090	407840	381960	298220	313790	431930	331550	565540	486970	489380	443550	439690	--	--
pmb3002	3.69	607.17	299	608.174	C28H32O15	[M-H]-	Chrysoeriol-7-O-rutinoside	Flavonoids	Flavones	-	3	9	67556	9	263330	299120	261750	204880	323360	195350	163660	117590	113410	230700	203040	223650	211450	148250	176680	163470	270210	--	--
MWSHY0190	4.11	609.18	301.08	608.174	C28H32O15	[M+H]+	Diosmetin-7-O-rutinoside (Diosmin)	Flavonoids	Flavones	520-27-4	2	968620	980200	1138700	734820	770750	751430	456310	569880	722070	533940	526990	506550	557990	616180	618770	404180	585380	656400	546970	644040	C10039	--
Lmmp000897	3.26	611.14	287.05	610.132	C30H26O14	[M+H]+	Gallocatechin-(4α→8)-gallocatechin	Flavonoids	Flavanols	-	3	9	9	9	35333	49952	24596	22798	27187	16270	15108	16551	36505	21084	19548	23643	27086	19214	23643	27680	27669	--	--
MWSHY0067	3.66	611.16	303.05	610.153	C27H30O16	[M+H]+	Quercetin-3-O-rutinoside (Rutin)	Flavonoids	Flavonols	153-18-4	1	53739000	14806000	17179000	18678000	18983000	20253000	14921000	9411900	37213000	4073800	3943200	9	15621000	17536000	15167000	16945000	16467000	13965000	14979000	20287000	C05625	ko00944,ko01100,ko01110
pmb0665	3.64	611.16	465.1	610.153	C27H30O16	[M+H]+	Orientin-7-O-glucoside	Flavonoids	Flavonoid carbonoside	-	3	554680	511560	347140	612980	526340	602530	337260	436110	387650	132100	129220	138240	552570	481280	544130	539080	527970	600800	590750	630780	--	--
Zmjp003031	3.34	611.16	449.11	610.153	C27H30O16	[M+H]+	Orientin-2''-O-galactoside	Flavonoids	Flavonoid carbonoside	-	3	95350	64316	80021	333830	376120	437220	415780	444040	450930	517580	443510	204750	348070	91945	256230	346860	309420	280040	409620	194720	--	--
Lmjp002461	3.56	611.16	303.05	610.153	C27H30O16	[M+H]+	Quercetin-3-O-neohesperidoside	Flavonoids	Flavonols	117611-67-3	1	50975000	48479000	53899000	24295000	49222000	47474000	12150000	14521000	14717000	7936800	8212200	9945200	22684000	18276000	19724000	22440000	23186000	45543000	29844000	19901000	--	--
Zmxp003107	3.53	611.16	287.06	610.153	C27H30O16	[M+H]+	Luteolin-7,3'-di-O-glucoside	Flavonoids	Flavones	52187-80-1	3	247190	179910	171430	59658	61259	44304	40452	41002	36598	12263	36265	15092	84615	62499	101110	95638	87703	94304	79542	126440	--	--
Lmyn001269	2.38	609.15	285.04	610.154	C27H30O16	[M-H]-	Kaempferol-3-O-sophoroside	Flavonoids	Flavonols	19895-95-5	3	1382600	1125900	1348000	85432	91943	80745	43246	46608	47273	21173	22880	24860	153720	158200	176900	165070	128300	161740	171360	161660	C12634	ko00944
pme0001	3.95	609.18	301	610.19	C28H34O15	[M-H]-	Hesperetin-7-O-neohesperidoside(Neohesperidin)	Flavonoids	Flavanones	13241-33-3	3	1086300	1170000	927230	937020	779250	830380	638160	454540	716950	498300	644310	492260	440010	457350	634150	628160	664880	598210	600780	498840	C09806	ko00941
Zmxp002867	3.57	625.17	301.07	624.168	C28H32O16	[M+H]+	Chrysoeriol-5,7-di-O-glucoside	Flavonoids	Flavones	-	3	35040	28186	15394	100120	100370	88814	120040	117610	105950	96856	125400	85617	59460	54665	69996	59147	65136	89358	68090	70976	--	--
MWSHY0064	3.95	625.17	317.07	624.169	C28H32O16	[M+H]+	Isorhamnetin-3-O-neohesperidoside*	Flavonoids	Flavonols	55033-90-4	1	2905600	3622400	3677200	960640	999820	1337400	859460	711380	906330	381470	241390	313050	3735200	3884100	3924200	4015900	3690400	3878300	3954800	4400800	--	--
Zmxp004480	3.57	625.18	301.07	624.169	C28H32O16	[M+H]+	Chrysoeriol-7-O-gentiobioside	Flavonoids	Flavones	-	3	43744	38003	28529	83788	111700	151180	153100	117480	110810	163290	156720	109320	93314	64645	63192	57998	81854	59024	73843	62751	--	--
MWSHY0135	3.95	625.18	317.08	624.169	C28H32O16	[M+H]+	Isorhamnetin-3-O-rutinoside (Narcissin)*	Flavonoids	Flavonols	604-80-8	1	3084000	3501100	3937900	1134900	1141600	1326200	820920	863210	753060	323360	373740	346790	3900600	4041300	3875100	3152400	3667500	4159900	4307100	4822800	--	--
Zmcp002666	2.78	627.14	303.05	626.148	C27H30O17	[M+H]+	Quercetin-3,7-Di-O-glucoside	Flavonoids	Flavonols	-	1	64626	56523	70323	26268	25168	17343	13647	46955	10025	10438	16987	20993	23960	40393	40985	43963	50022	36782	21543	40116	--	--
Lmmp002796	3.53	627.16	319.05	626.148	C27H30O17	[M+H]+	Gossypetin-3-O-rutinoside	Flavonoids	Flavonols	-	3	15394	35040	32412	38928	36934	34063	50595	49243	45739	57542	42812	41185	33009	80916	40374	58470	57527	61794	55871	52770	--	--
MWSHY0162	3.35	627.16	303.06	626.148	C27H30O17	[M+H]+	Quercetin-3-O-sophoroside (Baimaside)	Flavonoids	Flavonols	18609-17-1	1	717770	519440	831760	235150	267570	133060	114840	145170	99570	57978	50852	62844	314650	379440	369920	335230	285310	359880	291800	373090	C12667	ko00944
pmb0618	2.78	627.19	465.1	626.185	C28H34O16	[M+H]+	Hesperetin-8-C-glucoside-3'-O-glucoside	Flavonoids	Flavonoid carbonoside	-	3	262510	220910	210190	75605	115360	123770	65823	74752	102270	20575	20298	27803	104020	121690	95442	120970	81735	133020	117920	104580	--	--
Hmlp002975	3.71	639.15	493.1	638.139	C28H30O17	[M+H]+	Isorhamnetin-3-O-glucuronide-7-O-rhamnoside	Flavonoids	Flavonols	-	2	9	20186	6058.6	11069	3031	12072	6034	12060	12095	7069.1	2018.7	2023.6	13064	16077	14066	17159	19087	24138	16260	11054	--	--
Hmgp003086	4.13	639.19	331.08	638.184	C29H34O16	[M+H]+	Tricin-7-O-rutinoside*	Flavonoids	Flavones	-	3	25115	20543	19657	18609	20969	13695	7693.9	5130.4	11723	10275	12821	16261	3353	8742.7	6701	10049	11966	6993.2	10401	17117	--	--
Lmgp004959	4.12	639.19	331.08	638.185	C29H34O16	[M+H]+	Tricin-7-O-neohesperidoside*	Flavonoids	Flavones	53766-40-8	3	31667	24821	27965	27064	20793	17093	11966	9309	10263	9408.4	10049	12131	13695	5247.7	19058	5296.1	10049	9309	11112	13108	--	--
Lmmp002560	3.34	641.13	303.05	640.128	C27H28O18	[M+H]+	Quercetin-3-O-(2''-O-glucosyl)glucuronide	Flavonoids	Flavonols	-	3	56063	141650	35907	147530	121860	241530	91456	85119	84189	24569	39061	24920	50015	73461	105590	91693	55898	80037	94967	66384	--	--
Hmcp001578	3.05	641.17	479.11	640.163	C28H32O17	[M+H]+	Isorhamnetin-3,7-O-diglucoside	Flavonoids	Flavonols	6758-51-6	2	19218	11596	17077	7598.5	18634	13452	9	9	9	9	9	9	21142	29118	37835	23057	20501	26892	34121	29625	--	--
Lmsp003252	3.05	641.17	317.07	640.164	C28H32O17	[M+H]+	Isorhamnetin-3-O-sophoroside	Flavonoids	Flavonols	-	1	26747	20499	22927	32200	28848	32838	23295	21874	25928	13449	25513	10192	86319	89272	68888	56348	51883	96780	79380	51601	--	--
Hmqp003184	3.98	667.15	287.06	666.143	C29H30O18	[M+H]+	Luteolin-7-O-(6''-malonyl)glucoside-5-O-arabinoside	Flavonoids	Flavones	-	3	17417	13099	18331	41164	38574	41946	29863	25250	23437	11449	21627	15226	10140	14052	15678	13205	16847	28231	18120	15064	--	--
pmb0579	5.02	669.18	207	668.174	C33H32O15	[M+H]+	Chrysoeriol-7-O-(6''-sinapoyl)glucoside	Flavonoids	Flavones	-	3	22047	12990	16134	13769	17519	23329	16808	19645	20654	13078	13919	14561	14065	18303	24269	18828	21564	23710	28946	24955	--	--
Lmmp003266	3.74	683.15	303.05	682.138	C29H30O19	[M+H]+	Quercetin-3-O-(2''-O-malonyl)glucoside-7-O-arabinoside	Flavonoids	Flavonols	-	1	10096	19050	17733	135750	64566	102210	258340	166340	260350	157320	164880	156660	86458	107970	100150	112610	107950	112010	115030	96408	--	--
Xmyp004678	3.58	727.21	287.05	726.201	C32H38O19	[M+H]+	Kaempferol-3-O-(2-O-Xylosyl-6-O-Rhamnosyl)Glucoside	Flavonoids	Flavonols	-	1	263530	167670	152920	7955300	6760200	6184200	7830600	7022100	6546000	5120800	3822400	4137100	3996800	3582300	3655300	3663500	3435400	3129200	4248500	3699000	--	--
Zmlp003063	3.5	741.23	433.12	740.209	C33H40O19	[M+H]+	Luteolin-7-O-(2''-O-rhamnosyl)rutinoside*	Flavonoids	Flavones	-	3	193100	166900	110100	1146900	1066700	1233900	1200800	1125300	1104300	1097700	1118900	1096700	649180	865930	962590	874140	939270	1070200	959050	966200	--	--
mws1035	3.48	741.22	433	740.216	C33H40O19	[M+H]+	Kaempferol-3-O-robinoside-7-O-rhamnoside (Robinin)*	Flavonoids	Flavonols	301-19-9	3	155900	111210	105520	1015900	969110	973810	803520	922140	929380	814580	698030	815950	661130	677250	718210	653090	764990	638060	812850	732850	C10178	--
Lmsp003881	3.48	741.22	287.06	740.216	C33H40O19	[M+H]+	Kaempferol-3-O-rutinoside-7-O-rhamnoside	Flavonoids	Flavonols	-	1	11054000	6894700	5280300	48988000	42433000	50610000	45023000	49526000	45114000	52456000	46379000	46853000	34681000	39905000	46697000	43533000	40477000	36269000	42317000	42386000	--	--
HJAP061	3.41	743.2	303.05	742.195	C32H38O20	[M+H]+	Quercetin-3-O-(2''-O-arabinosyl)rutinoside	Flavonoids	Flavonols	-	1	3288300	3204900	2832500	49597000	46448000	54018000	69496000	72243000	72525000	54151000	52248000	54824000	44183000	45738000	48146000	45027000	54562000	50058000	47864000	43306000	--	--
Hmcp001618	3.4	743.2	449.1	742.195	C32H38O20	[M+H]+	Quercetin-3-O-(2''-O-Xylosyl)rutinoside	Flavonoids	Flavonols	129235-39-8	3	76957	62209	50887	1013100	801430	980550	1185700	1422500	1375600	1034400	1028200	988860	797430	751500	909020	610350	834150	859580	844340	815790	C10175	ko00944
Hmqp002870	3.48	743.2	287.06	742.196	C32H38O20	[M+H]+	Luteolin-7-O-Sophoroside-5-O-arabinoside	Flavonoids	Flavones	-	3	501420	368250	267180	1699000	2840600	3077100	2543600	2570000	2275900	2736500	2591300	1748700	1673800	1811200	1722000	2409800	2029300	1978900	2047700	2095700	--	--
pmb0660	3.38	757.2	147.1	756.19	C36H36O18	[M+H]+	Isoorientin-7-O-(6''-p-coumaroyl)glucoside	Flavonoids	Flavonoid carbonoside	-	3	19404	35595	16945	72011	30369	76360	76716	38564	66600	48022	78084	50324	71966	42131	45552	50583	49145	32919	40380	50028	--	--
Zmgp002857	3.33	757.22	303.05	756.211	C33H40O20	[M+H]+	Quercetin-3-O-α-rhamnosyl (1→2)-[α-rhamnosyl (1→6)]-β-glucoside	Flavonoids	Flavonols	-	3	703560	809530	770950	2448000	2083900	2088300	2525700	1889400	1946700	1621200	1811000	1356900	1672700	1534300	1315200	1480900	1429200	1818300	1871400	1402600	--	--
pmp001105	2.94	757.22	287.06	756.211	C33H40O20	[M+H]+	Kaempferol-3-O-neohesperidoside-7-O-glucoside	Flavonoids	Flavonols	-	3	88180	48015	105680	74423	25323	81133	62828	48575	62225	46183	35717	38437	36791	64878	51724	64664	70256	28693	36320	29864	--	--
Lnrp102163	3.47	757.21	303.05	756.211	C33H40O20	[M+H]+	Quercetin-3-O-rutinoside-7-O-rhamnoside	Flavonoids	Flavonols	-	3	744100	895000	577380	1896700	1596000	2301900	2417700	1662000	2962700	1176200	1445100	1758100	908330	1132800	1195300	1982800	1585200	1008900	1347200	861980	--	--
Lmpp003268	3.34	757.22	287.06	756.211	C33H40O20	[M+H]+	Kaempferol-3-O-rutinoside-7-O-glucoside	Flavonoids	Flavonols	-	3	17847	9579.2	6673	100920	120490	60387	119760	93214	103400	85716	85587	95692	81433	84820	98060	84884	83906	103890	102360	111020	--	--
Lmsp003161	2.98	757.22	287.06	756.211	C33H40O20	[M+H]+	Kaempferol-3-O-sophoroside-7-O-rhamnoside	Flavonoids	Flavonols	-	3	98446	115960	103270	67714	85684	89058	60389	66568	65722	54295	50196	43317	57739	65358	71381	50984	55896	50358	58080	88188	--	--
HJAP127	3.33	757.22	303.05	756.212	C33H40O20	[M+H]+	Quercetin-3-O-(2''-O-Rhamnosyl)rutinoside	Flavonoids	Flavonols	55696-57-6	1	36910000	39245000	35388000	57581000	53731000	57424000	51498000	53074000	56512000	55484000	57027000	66643000	52238000	54280000	43897000	53306000	51757000	56092000	60578000	52863000	--	--
Hmcp001329	2.62	759.2	303.05	758.191	C32H38O21	[M+H]+	Quercetin-3-O-xylosyl(1→2)glucosyl(1→2)glucoside	Flavonoids	Flavonols	-	3	9	9	9	11185	7944.6	16733	47842	39771	40408	36155	27339	27511	23748	25126	25608	33370	21727	27290	26729	20684	--	--
Lmjp003206	3.33	759.2	303.05	758.191	C32H38O21	[M+H]+	Quercetin-3-O-Sambubioside-5-O-Glucoside	Flavonoids	Flavonols	-	3	1941600	2086100	2019000	4354300	4593800	3903900	3851100	3817000	4369100	4509700	4192700	2823800	3526100	3170700	2776500	3040600	3136200	3848000	3045100	3552400	--	--
pmb0592	3.53	771.23	463.2	770.227	C34H42O20	[M+H]+	Chrysoeriol-7-O-rutinoside-5-O-glucoside	Flavonoids	Flavones	-	3	16104	23002	27028	33056	28413	45088	67073	77678	69017	64215	58378	57998	71967	67644	62499	69252	53864	78595	64652	73135	--	--
HJAP128	3.53	771.23	317.06	770.227	C34H42O20	[M+H]+	Isorhamnetin-3-O-rutinoside-7-O-rhamnoside	Flavonoids	Flavonols	-	2	1221700	1356800	1264700	2751200	2795500	2822700	4382800	3615700	4309400	3205500	3735800	3460800	3985800	3794500	3610800	4088700	3439600	4592900	3869100	3941100	--	--
Lmsp002982	2.84	773.21	303.05	772.206	C33H40O21	[M+H]+	Quercetin-3-O-sophoroside-7-O-rhamnoside	Flavonoids	Flavonols	-	3	905890	921870	964080	385280	322860	370640	203880	246850	237570	139560	114020	143560	245290	230490	251890	202720	227340	204890	230620	246810	--	--
Lmmp002755	3.5	773.21	303.05	772.206	C33H40O21	[M+H]+	Quercetin-7-O-rutinoside-4'-O-glucoside	Flavonoids	Flavonols	-	3	164140	153420	130750	403750	345340	351330	423610	543100	270910	460490	391480	498740	437820	293360	306680	545340	219480	459570	507150	430730	--	--
HJAP023	2.84	773.22	611.17	772.207	C33H40O21	[M+H]+	Kaempferol-6,8-di-C-glucoside-7-O-glucoside	Flavonoids	Flavonoid carbonoside	-	3	258590	244590	277610	114650	75213	93299	68132	55848	54866	26134	38069	33423	70410	63113	81724	69815	60335	61438	71650	64939	--	--
Lmsp003790	3.35	787.23	317.07	786.222	C34H42O21	[M+H]+	Isorhamnetin-3-O-sophoroside-7-O-rhamnoside	Flavonoids	Flavonols	41328-75-0	3	66071	165910	109780	18850	15321	14399	12714	9	9	5061.4	3605.6	9	41702	43314	44923	43202	52484	54467	51797	42514	--	--
Lmsp003853	3.18	919.25	303.05	918.243	C42H46O23	[M+H]+	Quercetin-3-O-(6''-O-p-coumaroyl)sophoroside-7-O-rhamnoside	Flavonoids	Flavonols	-	3	74701	74996	68210	301910	318990	386440	627390	462680	694950	702580	592630	705600	549610	678870	578200	617980	645760	485870	616190	542770	--	--
HJAP136	3.17	919.27	303.05	918.264	C39H50O25	[M+H]+	Quercetin-3-O-(2''-O-rhamnosyl)rutinoside-7-O-glucoside	Flavonoids	Flavonols	-	3	73359	70692	42690	266980	370600	355320	624500	543080	710280	684730	565030	717030	603750	578950	546150	609300	653410	591850	563250	578570	--	--
Lmhp002374	3.18	919.27	303.05	918.264	C39H50O25	[M+H]+	Quercetin-3-O-glucosyl(1→4)rhamnoside-7-O-rutinoside	Flavonoids	Flavonols	-	2	77496	54984	65454	305760	296650	394430	552130	513370	412250	529080	562880	622040	562850	625720	599990	620880	579030	583470	556930	444460	--	--
HJAP123	2.7	933.28	479.12	932.28	C40H52O25	[M+H]+	Isorhamnetin-3-O-rutinoside-7-O-rutinoside	Flavonoids	Flavonols	-	3	12630	11461	13067	4952.9	5447.9	4415.5	5495.2	7661.3	12681	6562.9	7755.8	6067.2	19846	11998	17156	7181.5	15400	14845	13125	13067	--	--
