# Supplementary material for: Integrative Analysis of the Metabolome and Transcriptome Provides Insights into the Mechanisms of Flavonoid Biosynthesis in Quinoa Seeds at Different Developmental Stages
Source: Metabolites. 2022 Sep 22;12(10):887. doi: 10.3390/metabo12100887 (PMC9609036; doi:10.3390/metabo12100887)
Supplement: Supplementary file 1 [file metabolites-12-00887-s001.zip › Table.S2.xlsx]

## Sheet: Sheet1
Table S2. Number and classification of the detected flavonoid metabolites are shown for FB2 vs. RB2.
Index	Formula	Compounds	Class I	Class II	CAS	Level	FB2-1	FB2-2	FB2-3	RB2-1	RB2-2	RB2-3	VIP	p_value	FDR	Fold_Change	Log2FC	Type
MWSHY0124	C15H12O4	Pinocembrin (Dihydrochrysin)	Flavonoids	Flavanones	480-39-7	1	164030	247770	327580	79991	68308	53070	1.12026	0.0592961	0.0948289	0.272348	-1.87647	down
pme0376	C15H12O5	Naringenin (5,7,4'-Trihydroxyflavanone)*	Flavonoids	Flavanones	480-41-1	3	210000	181550	215180	100090	104350	80166	1.15669	0.00171669	0.0107878	0.469082	-1.09209	down
mws0914	C15H12O5	3,5,7-Trihydroxyflavanone (Pinobanksin)*	Flavonoids	Flavanonols	548-82-3	3	229210	211610	220510	99625	127220	93408	1.15481	0.00256075	0.013204	0.484256	-1.04616	down
pme1201	C15H14O5	Phloretin	Flavonoids	Chalcones	60-82-2	3	196810	170030	163030	7439.6	6861.5	9297.2	1.19126	0.00355973	0.0153396	0.044536	-4.48888	down
mws0058	C16H12O6	Diosmetin (5,7,3'-Trihydroxy-4'-methoxyflavone)	Flavonoids	Flavones	520-34-3	3	9	9	9	9124	31247	11975	1.18791	0.128772	0.180965	1938.74	10.9209	up
Zmhp002814	C16H12O6	5,7,8-Tetrahydroxy-6-methoxyflavone	Flavonoids	Flavones	-	3	64121	63584	56525	9	9	9	1.194	0.001585	0.0104759	0.000146556	-12.7363	down
Zmhp002714	C16H12O6	5,6,7-Tetrahydroxy-8-methoxyflavone	Flavonoids	Flavones	-	3	64121	63584	56525	9	9	9	1.194	0.001585	0.0104759	0.000146556	-12.7363	down
pme2954	C15H10O7	Quercetin	Flavonoids	Flavonols	117-39-5	1	777690	727040	528380	47963	57544	44829	1.18742	0.0142012	0.0356506	0.0739439	-3.75743	down
mws0044	C15H12O7	Taxifolin(Dihydroquercetin)	Flavonoids	Flavanonols	480-18-2	2	5729400	5087000	7054000	444550	462810	492750	1.19016	0.0109086	0.0294845	0.078348	-3.67396	down
mws0049	C15H14O7	Gallocatechin	Flavonoids	Flavanols	970-73-0	3	155710	149160	153670	25375	19245	12535	1.1723	6.47257e-05	0.00202807	0.124646	-3.0041	down
mws0042	C15H14O7	Epigallocatechin	Flavonoids	Flavanols	970-74-1	3	3989900	3427000	4181300	356500	457950	386440	1.18987	0.00372885	0.0157331	0.103541	-3.27173	down
MWSHY0068	C16H12O7	Isorhamnetin	Flavonoids	Flavonols	480-19-3	1	111230	73520	58757	1054.3	5376.5	2524.5	1.14685	0.0369226	0.0670311	0.0367764	-4.76508	down
Hmgp001996	C15H10O8	Quercetagetin; 3,3',4',5,6,7-Hexahydroxyflavone	Flavonoids	Flavonols	90-18-6	3	9	9	9	23926	20300	22880	1.19395	0.0023142	0.012522	2485.41	11.2793	up
mws0917	C17H14O7	3,7-Di-O-methylquercetin	Flavonoids	Flavonols	2068-02-2	3	20784	28057	7450.3	2278.6	2074.7	910.99	1.09774	0.10545	0.152497	0.0935187	-3.4186	down
mws0919	C21H20O10	Kaempferol-3-O-rhamnoside (Afzelin)(Kaempferin)	Flavonoids	Flavonols	482-39-3	3	47967	55487	68257	25357	19104	38691	1.02027	0.0234346	0.0488317	0.484256	-1.04616	down
mws1179	C21H22O10	Naringenin-7-O-glucoside (Prunin)	Flavonoids	Flavanones	529-55-5	1	292230	310280	346600	139380	139090	132040	1.1842	0.00684146	0.0214047	0.432521	-1.20916	down
HJN087	C21H22O10	Naringenin-4'-O-glucoside	Flavonoids	Flavanones	-	1	518100	450840	559350	117410	118910	109370	1.18891	0.00602083	0.0203389	0.226194	-2.14437	down
mws2118	C21H24O10	Phloretin-2'-O-glucoside (Phlorizin)	Flavonoids	Chalcones	60-81-1	1	359410	675280	646170	93341	92772	66386	1.15833	0.0410691	0.0714906	0.15022	-2.73485	down
pmp000575	C22H22O10	Acacetin-7-O-glucoside (Tilianin)*	Flavonoids	Flavones	4291-60-5	3	56907	72002	45862	27780	16382	26368	1.0833	0.0280799	0.0565608	0.403557	-1.30916	down
pmp000573	C22H22O10	Acacetin-7-O-galactoside*	Flavonoids	Flavones	-	3	57585	65513	73688	25018	16612	36196	1.07334	0.00631001	0.0205318	0.395485	-1.3383	down
Hmcp002316	C21H20O11	Isorhamnetin-3-O-arabinoside	Flavonoids	Flavonols	-	3	310260	476220	368300	116360	120190	137540	1.16037	0.0312781	0.0604138	0.323949	-1.62616	down
mws0057	C21H22O11	Eriodictyol-7-O-glucoside	Flavonoids	Flavanones	38965-51-4	3	24771	26597	41936	155590	175260	196240	1.17075	0.00201972	0.0115451	5.64917	2.49804	up
Lmtn002796	C21H22O11	Aromadendrin-7-O-glucoside	Flavonoids	Flavanonols	28189-90-4	3	1381700	1574600	1500900	628620	607980	635700	1.18867	0.00360694	0.0154115	0.420062	-1.25133	down
Lmsp004301	C21H22O11	3',5,5',7-Tetrahydroxyflavanone-7-O-glucoside	Flavonoids	Flavanones	-	3	37601	59611	33951	335630	177780	324800	1.1463	0.0407229	0.0710342	6.3906	2.67595	up
HJN041	C21H24O11	Epicatechin glucoside	Flavonoids	Flavanols	-	3	7784100	5703200	7240800	1875600	1856900	1925000	1.18144	0.0149635	0.0363154	0.272939	-1.87335	down
Hmpn005101	C21H24O11	Sieboldin	Flavonoids	Chalcones	18777-73-6	3	37601	59611	33951	335630	177780	324800	1.1463	0.0407229	0.0710342	6.3906	2.67595	up
Lmmp003767	C21H18O12	Kaempferol-7-O-glucuronide	Flavonoids	Flavonols	-	2	7092100	7202100	5779000	2916800	2548600	3341000	1.15702	0.00555684	0.0193461	0.438714	-1.18865	down
pmp000579	C22H22O11	Diosmetin-7-O-galactoside*	Flavonoids	Flavones	-	1	2123900	3079700	1911700	9026800	5281200	8797800	1.11359	0.0389349	0.0690933	3.24734	1.69926	up
Hmmp004965	C22H22O11	Diosmetin-7-O-glucoside*	Flavonoids	Flavones	20126-59-4	1	2123900	3079700	1911700	9026800	5281200	8797800	1.11359	0.0389349	0.0690933	3.24734	1.69926	up
Hmcp002539	C22H22O11	Isorhamnetin-3-O-rhamnoside	Flavonoids	Flavonols	-	3	184860	363850	313530	143000	107810	136780	1.03075	0.0917194	0.136163	0.449515	-1.15356	down
Hmcn001884	C21H20O12	6-Hydroxyluteolin 5-glucoside	Flavonoids	Flavones	-	2	9	9	9	5706900	5777200	7036300	1.19397	0.00485873	0.0180464	685941	19.3877	up
mws0856	C21H20O12	Quercetin-4'-O-glucoside (Spiraeoside)	Flavonoids	Flavonols	20229-56-5	1	2818200	2328000	2298200	5703000	5594800	6314800	1.1757	0.000407468	0.00557481	2.36589	1.24238	up
mws1329	C21H20O12	Quercetin-7-O-glucoside*	Flavonoids	Flavonols	491-50-9	1	2842300	2127500	2598600	5223300	6336300	4807200	1.1411	0.0119925	0.0310264	2.16252	1.11271	up
Xmsn002700	C21H22O12	Taxifolin-3'-O-glucoside	Flavonoids	Flavanonols	31106-05-5	3	110350	38004	38343	153690	168140	182210	1.00677	0.0367511	0.0670075	2.69978	1.43284	up
Lmmn003398	C23H22O12	Kaempferol-3-O-(6''-O-acetyl)glucoside	Flavonoids	Flavonols	-	3	185050	230510	238440	89405	75050	83322	1.17138	0.0110403	0.0295434	0.378864	-1.40025	down
pmn001642	C23H20O13	Kaempferol-3-O-(2''-O-acetyl)glucuronide	Flavonoids	Flavonols	-	3	58789	74857	61975	30693	30134	25337	1.16281	0.010856	0.0294485	0.440464	-1.1829	down
Hmln002199	C23H22O13	Quercetin-3-O-(6''-O-acetyl)galactoside	Flavonoids	Flavonols	-	3	32147	49493	67475	157800	195850	418150	1.08661	0.122793	0.1743	5.17587	2.3718	up
pmn001644	C23H20O14	Quercetin-3-O-(2''-O-acetyl)glucuronide	Flavonoids	Flavonols	-	3	19384	12667	37932	9	9	9	1.18983	0.0908907	0.135376	0.000385808	-11.3398	down
pmb0608	C25H24O14	Chrysoeriol-7-O-(6''-malonyl)glucoside	Flavonoids	Flavones	-	3	158750	160190	179590	59938	29652	32690	1.14094	0.00077192	0.00805462	0.245281	-2.02749	down
pmp000589	C24H22O15	Quercetin-7-O-(6''-malonyl)glucoside	Flavonoids	Flavonols	-	1	443800	335760	354380	1222600	983030	1377500	1.16417	0.0136294	0.034626	3.15989	1.65988	up
pmb3114	C30H26O11	Epicatechin-epiafzelechin	Flavonoids	Flavanols	-	3	126450	129320	110110	14621	9897.5	16964	1.18023	0.00124504	0.00934227	0.113377	-3.1408	down
HJAP064	C25H24O15	Isorhamnetin-3-O-(6''-malonyl)glucoside	Flavonoids	Flavonols	-	2	170590	222690	154510	428620	395550	366080	1.1431	0.00154442	0.0104527	2.17282	1.11957	up
Lmmp003306	C25H26O15	Quercetin-3-O-xylosyl(1→2)arabinoside	Flavonoids	Flavonols	-	1	38928	42693	51206	202740	156940	231580	1.17399	0.0174397	0.0400622	4.45135	2.15424	up
pmp000237	C26H26O15	Apigenin-6-C-(2''-glucuronyl)xyloside	Flavonoids	Flavonoid carbonoside	-	3	873080	1036400	901750	95861	148350	73150	1.17293	0.00099264	0.00844441	0.11289	-3.147	down
MWSHY0201	C27H30O14	Kaempferol-3,7-O-dirhamnoside (Kaempferitrin)	Flavonoids	Flavonols	482-38-2	2	3180000	2787100	4213200	375630	481590	329950	1.18006	0.018622	0.0414553	0.116614	-3.10018	down
Zmjp003291	C27H30O15	Vitexin-2''-O-galactoside	Flavonoids	Flavonoid carbonoside	-	3	7343.5	12768	9093	64365	73122	83672	1.1765	0.00465661	0.0177575	7.57277	2.92082	up
Lmnp002413	C27H30O15	Luteolin-6-C-glucoside-7-O-rhamnoside	Flavonoids	Flavonoid carbonoside	-	3	173220	126550	182660	850980	785860	925670	1.1814	0.000952009	0.00844441	5.31167	2.40917	up
pmp000593	C27H30O15	Luteolin-7-O-rutinoside*	Flavonoids	Flavones	3563-98-2	3	4880100	5019800	4734600	24193000	24325000	27350000	1.19236	0.00241049	0.0128256	5.18419	2.37412	up
MWSslk146	C27H30O15	4'-O-Glucosylvitexin	Flavonoids	Flavonoid carbonoside	38950-94-6	3	7343.5	12768	9093	64365	73122	83672	1.1765	0.00465661	0.0177575	7.57277	2.92082	up
Lmtp004044	C26H28O16	Quercetin-3-O-apiosyl(1→2)galactoside*	Flavonoids	Flavonols	-	3	664930	473950	822050	16154000	16443000	18480000	1.18813	0.00168873	0.0107695	26.0473	4.70306	up
Lmjp002596	C26H28O16	Quercetin-3-O-sambubioside*	Flavonoids	Flavonols	83048-35-5	3	759920	594560	782170	17368000	16273000	20082000	1.19148	0.00422227	0.0170911	25.1436	4.65212	up
MWSHY0092	C27H32O15	Eriodictyol-7-O-Rutinoside (Eriocitrin)	Flavonoids	Flavanones	13463-28-0	3	241600	121270	148640	946960	615400	913640	1.14086	0.0165793	0.0385333	4.84057	2.27518	up
Lmmp000897	C30H26O14	Gallocatechin-(4α→8)-gallocatechin	Flavonoids	Flavanols	-	3	9	9	9	35333	49952	24596	1.19252	0.0379891	0.0683805	4069.67	11.9907	up
Zmjp003031	C27H30O16	Orientin-2''-O-galactoside	Flavonoids	Flavonoid carbonoside	-	3	95350	64316	80021	333830	376120	437220	1.17589	0.00603434	0.0203389	4.78612	2.25886	up
Zmxp003107	C27H30O16	Luteolin-7,3'-di-O-glucoside	Flavonoids	Flavones	52187-80-1	3	247190	179910	171430	59658	61259	44304	1.16134	0.0220314	0.0463647	0.276045	-1.85703	down
Lmyn001269	C27H30O16	Kaempferol-3-O-sophoroside	Flavonoids	Flavonols	19895-95-5	3	1382600	1125900	1348000	85432	91943	80745	1.19224	0.00441321	0.0172763	0.0669312	-3.90118	down
Zmxp002867	C28H32O16	Chrysoeriol-5,7-di-O-glucoside	Flavonoids	Flavones	-	3	35040	28186	15394	100120	100370	88814	1.11973	0.00105212	0.0084981	3.67978	1.87962	up
MWSHY0064	C28H32O16	Isorhamnetin-3-O-neohesperidoside*	Flavonoids	Flavonols	55033-90-4	1	2905600	3622400	3677200	960640	999820	1337400	1.16385	0.00419984	0.0170911	0.323155	-1.6297	down
Zmxp004480	C28H32O16	Chrysoeriol-7-O-gentiobioside	Flavonoids	Flavones	-	3	43744	38003	28529	83788	111700	151180	1.11769	0.0502501	0.0833512	3.14364	1.65244	up
MWSHY0135	C28H32O16	Isorhamnetin-3-O-rutinoside (Narcissin)*	Flavonoids	Flavonols	604-80-8	1	3084000	3501100	3937900	1134900	1141600	1326200	1.17806	0.00804777	0.0241433	0.342364	-1.5464	down
Zmcp002666	C27H30O17	Quercetin-3,7-Di-O-glucoside	Flavonoids	Flavonols	-	1	64626	56523	70323	26268	25168	17343	1.14904	0.00177905	0.0109288	0.359212	-1.47709	down
MWSHY0162	C27H30O17	Quercetin-3-O-sophoroside (Baimaside)	Flavonoids	Flavonols	18609-17-1	1	717770	519440	831760	235150	267570	133060	1.09902	0.0209423	0.0445156	0.307293	-1.70231	down
pmb0618	C28H34O16	Hesperetin-8-C-glucoside-3'-O-glucoside	Flavonoids	Flavonoid carbonoside	-	3	262510	220910	210190	75605	115360	123770	1.10306	0.00448306	0.0173976	0.453764	-1.13999	down
Hmqp003184	C29H30O18	Luteolin-7-O-(6''-malonyl)glucoside-5-O-arabinoside	Flavonoids	Flavones	-	3	17417	13099	18331	41164	38574	41946	1.16305	0.000570327	0.00674622	2.49113	1.3168	up
Lmmp003266	C29H30O19	Quercetin-3-O-(2''-O-malonyl)glucoside-7-O-arabinoside	Flavonoids	Flavonols	-	1	10096	19050	17733	135750	64566	102210	1.13859	0.0512214	0.0841826	6.45334	2.69005	up
Xmyp004678	C32H38O19	Kaempferol-3-O-(2-O-Xylosyl-6-O-Rhamnosyl)Glucoside	Flavonoids	Flavonols	-	1	263530	167670	152920	7955300	6760200	6184200	1.18761	0.00570927	0.0196343	35.7798	5.16107	up
Zmlp003063	C33H40O19	Luteolin-7-O-(2''-O-rhamnosyl)rutinoside*	Flavonoids	Flavones	-	3	193100	166900	110100	1146900	1066700	1233900	1.1763	0.000379406	0.00544029	7.33355	2.87451	up
mws1035	C33H40O19	Kaempferol-3-O-robinoside-7-O-rhamnoside (Robinin)*	Flavonoids	Flavonols	301-19-9	3	155900	111210	105520	1015900	969110	973810	1.18548	2.56219e-06	0.000433522	7.94037	2.98921	up
Lmsp003881	C33H40O19	Kaempferol-3-O-rutinoside-7-O-rhamnoside	Flavonoids	Flavonols	-	1	11054000	6894700	5280300	48988000	42433000	50610000	1.16044	0.000399642	0.00557481	6.11438	2.61221	up
HJAP061	C32H38O20	Quercetin-3-O-(2''-O-arabinosyl)rutinoside	Flavonoids	Flavonols	-	1	3288300	3204900	2832500	49597000	46448000	54018000	1.19272	0.00210768	0.0117724	16.0913	4.00821	up
Hmcp001618	C32H38O20	Quercetin-3-O-(2''-O-Xylosyl)rutinoside	Flavonoids	Flavonols	129235-39-8	3	76957	62209	50887	1013100	801430	980550	1.18743	0.00521391	0.0186905	14.7068	3.87842	up
Hmqp002870	C32H38O20	Luteolin-7-O-Sophoroside-5-O-arabinoside	Flavonoids	Flavones	-	3	501420	368250	267180	1699000	2840600	3077100	1.1511	0.0339112	0.0633674	6.69983	2.74412	up
Zmgp002857	C33H40O20	Quercetin-3-O-α-rhamnosyl (1→2)-[α-rhamnosyl (1→6)]-β-glucoside	Flavonoids	Flavonols	-	3	703560	809530	770950	2448000	2083900	2088300	1.18474	0.00461495	0.0177575	2.89846	1.53529	up
Lnrp102163	C33H40O20	Quercetin-3-O-rutinoside-7-O-rhamnoside	Flavonoids	Flavonols	-	3	744100	895000	577380	1896700	1596000	2301900	1.12937	0.0157863	0.0377254	2.61433	1.38644	up
Lmpp003268	C33H40O20	Kaempferol-3-O-rutinoside-7-O-glucoside	Flavonoids	Flavonols	-	3	17847	9579.2	6673	100920	120490	60387	1.13344	0.0389569	0.0690933	8.26404	3.04685	up
Hmcp001329	C32H38O21	Quercetin-3-O-xylosyl(1→2)glucosyl(1→2)glucoside	Flavonoids	Flavonols	-	3	9	9	9	11185	7944.6	16733	1.19193	0.0431778	0.074345	1328.24	10.3753	up
Lmjp003206	C32H38O21	Quercetin-3-O-Sambubioside-5-O-Glucoside	Flavonoids	Flavonols	-	3	1941600	2086100	2019000	4354300	4593800	3903900	1.18265	0.00609746	0.0203447	2.12546	1.08777	up
HJAP128	C34H42O20	Isorhamnetin-3-O-rutinoside-7-O-rhamnoside	Flavonoids	Flavonols	-	2	1221700	1356800	1264700	2751200	2795500	2822700	1.19014	5.56069e-05	0.00188174	2.17772	1.12282	up
Lmsp002982	C33H40O21	Quercetin-3-O-sophoroside-7-O-rhamnoside	Flavonoids	Flavonols	-	3	905890	921870	964080	385280	322860	370640	1.18541	2.53397e-05	0.00150484	0.386405	-1.37182	down
Lmmp002755	C33H40O21	Quercetin-7-O-rutinoside-4'-O-glucoside	Flavonoids	Flavonols	-	3	164140	153420	130750	403750	345340	351330	1.17354	0.00180752	0.0109288	2.4546	1.29549	up
HJAP023	C33H40O21	Kaempferol-6,8-di-C-glucoside-7-O-glucoside	Flavonoids	Flavonoid carbonoside	-	3	258590	244590	277610	114650	75213	93299	1.15873	0.000432145	0.00562453	0.362661	-1.46331	down
Lmsp003790	C34H42O21	Isorhamnetin-3-O-sophoroside-7-O-rhamnoside	Flavonoids	Flavonols	41328-75-0	3	66071	165910	109780	18850	15321	14399	1.1449	0.0770843	0.11864	0.142117	-2.81485	down
Lmsp003853	C42H46O23	Quercetin-3-O-(6''-O-p-coumaroyl)sophoroside-7-O-rhamnoside	Flavonoids	Flavonols	-	3	74701	74996	68210	301910	318990	386440	1.18729	0.0090892	0.026066	4.6228	2.20877	up
HJAP136	C39H50O25	Quercetin-3-O-(2''-O-rhamnosyl)rutinoside-7-O-glucoside	Flavonoids	Flavonols	-	3	73359	70692	42690	266980	370600	355320	1.16039	0.00925693	0.0264573	5.31699	2.41061	up
Lmhp002374	C39H50O25	Quercetin-3-O-glucosyl(1→4)rhamnoside-7-O-rutinoside	Flavonoids	Flavonols	-	2	77496	54984	65454	305760	296650	394430	1.17789	0.0108604	0.0294485	5.03622	2.33234	up
HJAP123	C40H52O25	Isorhamnetin-3-O-rutinoside-7-O-rutinoside	Flavonoids	Flavonols	-	3	12630	11461	13067	4952.9	5447.9	4415.5	1.17963	0.000531726	0.00654404	0.398738	-1.32649	down
