# Supplementary material for: Integrative Analysis of the Metabolome and Transcriptome Provides Insights into the Mechanisms of Flavonoid Biosynthesis in Quinoa Seeds at Different Developmental Stages
Source: Metabolites. 2022 Sep 22;12(10):887. doi: 10.3390/metabo12100887 (PMC9609036; doi:10.3390/metabo12100887)
Supplement: Supplementary file 1 [file metabolites-12-00887-s001.zip › Table.S3.xlsx]

## Sheet: Sheet1
Table S3. Number and classification of the detected flavonoid metabolites are shown for FB2 vs. DB2.
Index	Formula	Compounds	Class I	Class II	CAS	Level	FB2-1	FB2-2	FB2-3	DB2-1	DB2-2	DB2-3	VIP	p_value	FDR	Fold_Change	Log2FC	Type
MWSHY0124	C15H12O4	Pinocembrin (Dihydrochrysin)	Flavonoids	Flavanones	480-39-7	1	164030	247770	327580	17947	19027	30533	1.12064	0.0408132	0.0623597	0.0913022	-3.45321	down
pme0376	C15H12O5	Naringenin (5,7,4'-Trihydroxyflavanone)*	Flavonoids	Flavanones	480-41-1	3	210000	181550	215180	54780	72829	72254	1.12782	0.0011625	0.00655672	0.32941	-1.60204	down
mws0914	C15H12O5	3,5,7-Trihydroxyflavanone (Pinobanksin)*	Flavonoids	Flavanonols	548-82-3	3	229210	211610	220510	67138	75738	84726	1.13832	3.59666e-05	0.00105139	0.344158	-1.53886	down
pme1201	C15H14O5	Phloretin	Flavonoids	Chalcones	60-82-2	3	196810	170030	163030	4523.3	4842.8	4987.4	1.14706	0.00356429	0.0119941	0.0270887	-5.20616	down
mws0058	C16H12O6	Diosmetin (5,7,3'-Trihydroxy-4'-methoxyflavone)	Flavonoids	Flavones	520-34-3	3	9	9	9	4104.1	15118	6776	1.13989	0.120776	0.155887	962.893	9.91123	up
Zmhp002814	C16H12O6	5,7,8-Tetrahydroxy-6-methoxyflavone	Flavonoids	Flavones	-	3	64121	63584	56525	9	9	9	1.14754	0.001585	0.00789663	0.000146556	-12.7363	down
Zmhp002714	C16H12O6	5,6,7-Tetrahydroxy-8-methoxyflavone	Flavonoids	Flavones	-	3	64121	63584	56525	9	9	9	1.14754	0.001585	0.00789663	0.000146556	-12.7363	down
pmc1990	C17H16O5	4'-Hydroxy-5,7-dimethoxyflavanone	Flavonoids	Flavanones	-	3	367780	345860	407080	698060	902460	874170	1.11544	0.014188	0.0277863	2.20813	1.14282	up
pme2954	C15H10O7	Quercetin	Flavonoids	Flavonols	117-39-5	1	777690	727040	528380	28952	26717	27920	1.14435	0.0134261	0.0264807	0.0411139	-4.60423	down
MWSHY0049	C16H14O6	Hesperetin	Flavonoids	Flavanones	520-33-2	3	9108.8	11043	11776	9	9	9	1.14721	0.00555077	0.0151966	0.000845658	-10.2076	down
mws0044	C15H12O7	Taxifolin(Dihydroquercetin)	Flavonoids	Flavanonols	480-18-2	2	5729400	5087000	7054000	390920	434680	429990	1.14434	0.0107233	0.0230212	0.0702609	-3.83113	down
mws0049	C15H14O7	Gallocatechin	Flavonoids	Flavanols	970-73-0	3	155710	149160	153670	15542	16677	9126.5	1.13349	2.03284e-06	0.000562851	0.0901677	-3.47125	down
mws0042	C15H14O7	Epigallocatechin	Flavonoids	Flavanols	970-74-1	3	3989900	3427000	4181300	227980	192590	232030	1.14559	0.00374054	0.0123851	0.0562674	-4.15156	down
MWSHY0068	C16H12O7	Isorhamnetin	Flavonoids	Flavonols	480-19-3	1	111230	73520	58757	9	9	2295.8	1.02208	0.0354755	0.0558131	0.00950199	-6.71756	down
Hmgp001996	C15H10O8	Quercetagetin; 3,3',4',5,6,7-Hexahydroxyflavone	Flavonoids	Flavonols	90-18-6	3	9	9	9	23920	23920	29401	1.14736	0.00500104	0.0141983	2860.78	11.4822	up
mws0917	C17H14O7	3,7-Di-O-methylquercetin	Flavonoids	Flavonols	2068-02-2	3	20784	28057	7450.3	9	9	9	1.14114	0.0897831	0.119899	0.000479648	-11.0257	down
mws0919	C21H20O10	Kaempferol-3-O-rhamnoside (Afzelin)(Kaempferin)	Flavonoids	Flavonols	482-39-3	3	47967	55487	68257	29158	18720	17954	1.06995	0.0115287	0.0239808	0.383388	-1.38312	down
mws1179	C21H22O10	Naringenin-7-O-glucoside (Prunin)	Flavonoids	Flavanones	529-55-5	1	292230	310280	346600	100230	94772	94213	1.14248	0.00474834	0.0138386	0.304722	-1.71443	down
HJN087	C21H22O10	Naringenin-4'-O-glucoside	Flavonoids	Flavanones	-	1	518100	450840	559350	52195	43934	55669	1.14373	0.00432913	0.013251	0.0993254	-3.33169	down
mws2118	C21H24O10	Phloretin-2'-O-glucoside (Phlorizin)	Flavonoids	Chalcones	60-81-1	1	359410	675280	646170	47537	47917	41145	1.13072	0.0362103	0.0566537	0.0812673	-3.62118	down
pmp000573	C22H22O10	Acacetin-7-O-galactoside*	Flavonoids	Flavones	-	3	57585	65513	73688	28871	17619	33121	1.05035	0.00398788	0.0128303	0.404556	-1.30559	down
Hmcp002316	C21H20O11	Isorhamnetin-3-O-arabinoside	Flavonoids	Flavonols	-	3	310260	476220	368300	87595	87355	110240	1.12252	0.0247067	0.0420709	0.246965	-2.01762	down
mws0045	C21H20O11	Quercetin-3-O-rhamnoside(Quercitrin)	Flavonoids	Flavonols	522-12-3	1	1047600	1093000	1126100	414480	290640	436710	1.11455	0.000882341	0.00542531	0.349536	-1.51649	down
mws0057	C21H22O11	Eriodictyol-7-O-glucoside	Flavonoids	Flavanones	38965-51-4	3	24771	26597	41936	174240	205830	161180	1.12516	0.00315287	0.0110026	5.80093	2.53628	up
Lmtn002796	C21H22O11	Aromadendrin-7-O-glucoside	Flavonoids	Flavanonols	28189-90-4	3	1381700	1574600	1500900	116830	123330	124450	1.14685	0.00166535	0.00802397	0.0818025	-3.61171	down
Lmsp004301	C21H22O11	3',5,5',7-Tetrahydroxyflavanone-7-O-glucoside	Flavonoids	Flavanones	-	3	37601	59611	33951	212000	442560	248320	1.09986	0.0677079	0.0942796	6.88365	2.78317	up
HJN041	C21H24O11	Epicatechin glucoside	Flavonoids	Flavanols	-	3	7784100	5703200	7240800	1001600	1253100	1032100	1.13888	0.010359	0.0225332	0.158567	-2.65683	down
Hmpn005101	C21H24O11	Sieboldin	Flavonoids	Chalcones	18777-73-6	3	37601	59611	33951	212000	442560	248320	1.09986	0.0677079	0.0942796	6.88365	2.78317	up
Lmzn001894	C21H18O12	Kaempferol-3-O-glucuronide	Flavonoids	Flavonols	22688-78-4	1	44078000	44595000	49812000	16210000	16265000	14872000	1.14258	0.0022896	0.00951757	0.341893	-1.54838	down
Lmmp003767	C21H18O12	Kaempferol-7-O-glucuronide	Flavonoids	Flavonols	-	2	7092100	7202100	5779000	1877500	1525900	1738100	1.13676	0.00623481	0.0162681	0.256138	-1.96501	down
MWSHY0121	C21H18O12	Luteolin-7-O-glucuronide	Flavonoids	Flavones	29741-10-4	1	54720000	57709000	53729000	19842000	19089000	20501000	1.14559	0.000378864	0.00324522	0.357684	-1.48324	down
pmp000579	C22H22O11	Diosmetin-7-O-galactoside*	Flavonoids	Flavones	-	1	2123900	3079700	1911700	10288000	6783800	10468000	1.10034	0.0221947	0.0388866	3.8705	1.95252	up
Hmmp004965	C22H22O11	Diosmetin-7-O-glucoside*	Flavonoids	Flavones	20126-59-4	1	2123900	3079700	1911700	10288000	6783800	10468000	1.10034	0.0221947	0.0388866	3.8705	1.95252	up
Hmcp002539	C22H22O11	Isorhamnetin-3-O-rhamnoside	Flavonoids	Flavonols	-	3	184860	363850	313530	77910	84317	92318	1.07969	0.0619302	0.0878208	0.295214	-1.76017	down
Hmcn001884	C21H20O12	6-Hydroxyluteolin 5-glucoside	Flavonoids	Flavones	-	2	9	9	9	6904800	5976000	5945900	1.14758	0.00250585	0.00997634	697285	19.4114	up
mws0856	C21H20O12	Quercetin-4'-O-glucoside (Spiraeoside)	Flavonoids	Flavonols	20229-56-5	1	2818200	2328000	2298200	5592600	5635100	6226000	1.1297	0.000281699	0.00287809	2.34454	1.22931	up
mws1329	C21H20O12	Quercetin-7-O-glucoside*	Flavonoids	Flavonols	491-50-9	1	2842300	2127500	2598600	5490800	5688400	6142300	1.11976	0.000350061	0.00312038	2.28866	1.1945	up
pme1598	C22H24O11	Hesperetin-5-O-glucoside	Flavonoids	Flavanones	69651-80-5	3	3166800	3915000	2183700	6679400	6209600	7074500	1.05035	0.00836243	0.0192699	2.15461	1.10742	up
Xmsn002700	C21H22O12	Taxifolin-3'-O-glucoside	Flavonoids	Flavanonols	31106-05-5	3	110350	38004	38343	219750	230040	219580	1.02373	0.0198878	0.03606	3.58533	1.84211	up
Lmqp003647	C21H18O13	Herbacetin-3-O-glucuronide	Flavonoids	Flavonols	-	1	11635000	10175000	11298000	5405800	4936000	4898300	1.13748	0.00232996	0.00954496	0.460315	-1.11931	down
Lmfn003760	C21H18O13	Quercetin-4'-O-glucuronide	Flavonoids	Flavonols	201463-36-7	1	7027600	6351600	6933500	2479100	3120000	2851900	1.13256	0.00016507	0.00226023	0.416045	-1.26519	down
Lmjp003044	C22H22O12	Isorhamnetin-3-O-Glucoside*	Flavonoids	Flavonols	5041-82-7	1	5258000	6356300	4160600	2342100	2114000	2158200	1.10005	0.0390617	0.0599269	0.419293	-1.25397	down
Hmcp002207	C22H22O12	Isorhamnetin-7-O-glucoside (Brassicin)*	Flavonoids	Flavonols	6743-96-0	1	4499400	6540800	3996600	2317600	2007500	2175100	1.07282	0.0654597	0.0919037	0.432286	-1.20994	down
Hmgp002036	C22H22O12	Nepetin-7-O-glucoside(Nepitrin)	Flavonoids	Flavones	569-90-4	1	4498400	5246900	3734600	2194100	1916700	1930300	1.10707	0.0256064	0.0434285	0.448156	-1.15793	down
Lmmn003398	C23H22O12	Kaempferol-3-O-(6''-O-acetyl)glucoside	Flavonoids	Flavonols	-	3	185050	230510	238440	39594	21445	34713	1.12261	0.0043348	0.013251	0.14641	-2.77192	down
pmn001642	C23H20O13	Kaempferol-3-O-(2''-O-acetyl)glucuronide	Flavonoids	Flavonols	-	3	58789	74857	61975	9	9	9	1.14736	0.00562792	0.0153228	0.000138022	-12.8228	down
Hmln002199	C23H22O13	Quercetin-3-O-(6''-O-acetyl)galactoside	Flavonoids	Flavonols	-	3	32147	49493	67475	384740	209560	228000	1.09011	0.0520149	0.0757881	5.51454	2.46324	up
pmn001644	C23H20O14	Quercetin-3-O-(2''-O-acetyl)glucuronide	Flavonoids	Flavonols	-	3	19384	12667	37932	9	9	9	1.1437	0.0908907	0.120997	0.000385808	-11.3398	down
pmb0608	C25H24O14	Chrysoeriol-7-O-(6''-malonyl)glucoside	Flavonoids	Flavones	-	3	158750	160190	179590	34129	22794	31840	1.1343	0.000376172	0.00324522	0.178049	-2.48965	down
pmp000589	C24H22O15	Quercetin-7-O-(6''-malonyl)glucoside	Flavonoids	Flavonols	-	1	443800	335760	354380	1401100	1444400	1019300	1.11824	0.0167529	0.031853	3.40829	1.76905	up
pmb3114	C30H26O11	Epicatechin-epiafzelechin	Flavonoids	Flavanols	-	3	126450	129320	110110	6460.5	6478.2	11693	1.13551	0.00142252	0.00735926	0.0673218	-3.89278	down
HJAP064	C25H24O15	Isorhamnetin-3-O-(6''-malonyl)glucoside	Flavonoids	Flavonols	-	2	170590	222690	154510	588010	608500	557750	1.12759	0.000175181	0.00228544	3.20243	1.67917	up
Lmmp003306	C25H26O15	Quercetin-3-O-xylosyl(1→2)arabinoside	Flavonoids	Flavonols	-	1	38928	42693	51206	267540	235730	255910	1.14213	0.000574839	0.00431384	5.71555	2.51489	up
pmp000237	C26H26O15	Apigenin-6-C-(2''-glucuronyl)xyloside	Flavonoids	Flavonoid carbonoside	-	3	873080	1036400	901750	16146	12041	19172	1.14457	0.00293313	0.0106295	0.0168464	-5.89142	down
MWSHY0201	C27H30O14	Kaempferol-3,7-O-dirhamnoside (Kaempferitrin)	Flavonoids	Flavonols	482-38-2	2	3180000	2787100	4213200	58514	69386	82724	1.14399	0.0159652	0.0304921	0.0206894	-5.59497	down
pmb2586	C30H26O13	Gallocatechin-(4α→8)-catechin	Flavonoids	Flavanols	-	3	12855	17092	23480	5710.9	6374.2	9283.4	1.02567	0.0610347	0.0868413	0.399957	-1.32208	down
Zmjp003291	C27H30O15	Vitexin-2''-O-galactoside	Flavonoids	Flavonoid carbonoside	-	3	7343.5	12768	9093	43767	47260	66030	1.1156	0.0208166	0.0371631	5.37784	2.42703	up
Lmnp002413	C27H30O15	Luteolin-6-C-glucoside-7-O-rhamnoside	Flavonoids	Flavonoid carbonoside	-	3	173220	126550	182660	948990	1002100	958630	1.13798	4.64618e-06	0.000562851	6.03138	2.59249	up
MWSHY0050	C27H30O15	Kaempferol-3-O-rutinoside(Nicotiflorin)*	Flavonoids	Flavonols	17650-84-9	3	3566000	5494300	3849500	1631900	1363700	1673900	1.09963	0.0416276	0.0633755	0.361702	-1.46713	down
pmp000593	C27H30O15	Luteolin-7-O-rutinoside*	Flavonoids	Flavones	3563-98-2	3	4880100	5019800	4734600	20252000	24544000	22921000	1.14388	0.00481477	0.0138875	4.62722	2.21014	up
MWSslk146	C27H30O15	4'-O-Glucosylvitexin	Flavonoids	Flavonoid carbonoside	38950-94-6	3	7343.5	12768	9093	43767	47260	66030	1.1156	0.0208166	0.0371631	5.37784	2.42703	up
Lmtp004044	C26H28O16	Quercetin-3-O-apiosyl(1→2)galactoside*	Flavonoids	Flavonols	-	3	664930	473950	822050	24265000	19158000	19432000	1.14178	0.00645543	0.0165024	32.0537	5.00242	up
Lmjp002596	C26H28O16	Quercetin-3-O-sambubioside*	Flavonoids	Flavonols	83048-35-5	3	759920	594560	782170	18750000	19668000	18155000	1.14573	0.000479995	0.00387653	26.4774	4.72669	up
MWSHY0092	C27H32O15	Eriodictyol-7-O-Rutinoside (Eriocitrin)	Flavonoids	Flavanones	13463-28-0	3	241600	121270	148640	854550	802130	809570	1.11128	0.000767544	0.00504556	4.82151	2.26948	up
Lmmp000897	C30H26O14	Gallocatechin-(4α→8)-gallocatechin	Flavonoids	Flavanols	-	3	9	9	9	22798	27187	16270	1.14676	0.0200221	0.036202	2453.89	11.2609	up
Zmjp003031	C27H30O16	Orientin-2''-O-galactoside	Flavonoids	Flavonoid carbonoside	-	3	95350	64316	80021	415780	444040	450930	1.13643	1.84567e-05	0.000752588	5.46859	2.45117	up
Lmjp002461	C27H30O16	Quercetin-3-O-neohesperidoside	Flavonoids	Flavonols	117611-67-3	1	50975000	48479000	53899000	12150000	14521000	14717000	1.14177	0.000218732	0.00257618	0.269887	-1.88957	down
Zmxp003107	C27H30O16	Luteolin-7,3'-di-O-glucoside	Flavonoids	Flavones	52187-80-1	3	247190	179910	171430	40452	41002	36598	1.13548	0.0213674	0.037749	0.197237	-2.342	down
Lmyn001269	C27H30O16	Kaempferol-3-O-sophoroside	Flavonoids	Flavonols	19895-95-5	3	1382600	1125900	1348000	43246	46608	47273	1.14675	0.00417409	0.0130613	0.0355574	-4.81371	down
Zmxp002867	C28H32O16	Chrysoeriol-5,7-di-O-glucoside	Flavonoids	Flavones	-	3	35040	28186	15394	120040	117610	105950	1.09053	0.000384299	0.00325886	4.37039	2.12776	up
MWSHY0064	C28H32O16	Isorhamnetin-3-O-neohesperidoside*	Flavonoids	Flavonols	55033-90-4	1	2905600	3622400	3677200	859460	711380	906330	1.13438	0.0067238	0.0167422	0.242736	-2.04254	down
Zmxp004480	C28H32O16	Chrysoeriol-7-O-gentiobioside	Flavonoids	Flavones	-	3	43744	38003	28529	153100	117480	110810	1.11157	0.0132431	0.0263372	3.4585	1.79015	up
MWSHY0135	C28H32O16	Isorhamnetin-3-O-rutinoside (Narcissin)*	Flavonoids	Flavonols	604-80-8	1	3084000	3501100	3937900	820920	863210	753060	1.14017	0.00747006	0.0177939	0.231606	-2.11026	down
MWSHY0162	C27H30O17	Quercetin-3-O-sophoroside (Baimaside)	Flavonoids	Flavonols	18609-17-1	1	717770	519440	831760	114840	145170	99570	1.12483	0.0227413	0.0396222	0.173797	-2.52453	down
pmb0618	C28H34O16	Hesperetin-8-C-glucoside-3'-O-glucoside	Flavonoids	Flavonoid carbonoside	-	3	262510	220910	210190	65823	74752	102270	1.10726	0.00240063	0.00974036	0.350118	-1.51409	down
Hmgp003086	C29H34O16	Tricin-7-O-rutinoside*	Flavonoids	Flavones	-	3	25115	20543	19657	7693.9	5130.4	11723	1.03269	0.00630321	0.0162987	0.375829	-1.41185	down
Lmgp004959	C29H34O16	Tricin-7-O-neohesperidoside*	Flavonoids	Flavones	53766-40-8	3	31667	24821	27965	11966	9309	10263	1.1239	0.00610562	0.0160762	0.373438	-1.42106	down
Hmcp001578	C28H32O17	Isorhamnetin-3,7-O-diglucoside	Flavonoids	Flavonols	6758-51-6	2	19218	11596	17077	9	9	9	1.14675	0.0196418	0.0358122	0.00056378	-10.7926	down
Lmmp003266	C29H30O19	Quercetin-3-O-(2''-O-malonyl)glucoside-7-O-arabinoside	Flavonoids	Flavonols	-	1	10096	19050	17733	258340	166340	260350	1.12931	0.0199011	0.03606	14.6127	3.86915	up
Xmyp004678	C32H38O19	Kaempferol-3-O-(2-O-Xylosyl-6-O-Rhamnosyl)Glucoside	Flavonoids	Flavonols	-	1	263530	167670	152920	7830600	7022100	6546000	1.14196	0.00271434	0.0101399	36.6341	5.19511	up
Zmlp003063	C33H40O19	Luteolin-7-O-(2''-O-rhamnosyl)rutinoside*	Flavonoids	Flavones	-	3	193100	166900	110100	1200800	1125300	1104300	1.13121	1.73888e-05	0.000752588	7.29717	2.86734	up
mws1035	C33H40O19	Kaempferol-3-O-robinoside-7-O-rhamnoside (Robinin)*	Flavonoids	Flavonols	301-19-9	3	155900	111210	105520	803520	922140	929380	1.13687	0.000931976	0.00568572	7.12514	2.83292	up
Lmsp003881	C33H40O19	Kaempferol-3-O-rutinoside-7-O-rhamnoside	Flavonoids	Flavonols	-	1	11054000	6894700	5280300	45023000	49526000	45114000	1.11565	7.9849e-05	0.00162279	6.01244	2.58795	up
HJAP061	C32H38O20	Quercetin-3-O-(2''-O-arabinosyl)rutinoside	Flavonoids	Flavonols	-	1	3288300	3204900	2832500	69496000	72243000	72525000	1.14693	0.000151052	0.00224724	22.9756	4.52203	up
Hmcp001618	C32H38O20	Quercetin-3-O-(2''-O-Xylosyl)rutinoside	Flavonoids	Flavonols	129235-39-8	3	76957	62209	50887	1185700	1422500	1375600	1.14287	0.00299584	0.0108105	20.9615	4.38967	up
Hmqp002870	C32H38O20	Luteolin-7-O-Sophoroside-5-O-arabinoside	Flavonoids	Flavones	-	3	501420	368250	267180	2543600	2570000	2275900	1.12575	0.000109146	0.00178991	6.49998	2.70043	up
Zmgp002857	C33H40O20	Quercetin-3-O-α-rhamnosyl (1→2)-[α-rhamnosyl (1→6)]-β-glucoside	Flavonoids	Flavonols	-	3	703560	809530	770950	2525700	1889400	1946700	1.12683	0.0196798	0.0358122	2.78533	1.47785	up
Lnrp102163	C33H40O20	Quercetin-3-O-rutinoside-7-O-rhamnoside	Flavonoids	Flavonols	-	3	744100	895000	577380	2417700	1662000	2962700	1.07646	0.044101	0.0661906	3.17729	1.6678	up
Lmpp003268	C33H40O20	Kaempferol-3-O-rutinoside-7-O-glucoside	Flavonoids	Flavonols	-	3	17847	9579.2	6673	119760	93214	103400	1.11083	0.00236138	0.00962718	9.27805	3.21382	up
Hmcp001329	C32H38O21	Quercetin-3-O-xylosyl(1→2)glucosyl(1→2)glucoside	Flavonoids	Flavonols	-	3	9	9	9	47842	39771	40408	1.14753	0.00366694	0.0122424	4741.52	12.2111	up
pmb0592	C34H42O20	Chrysoeriol-7-O-rutinoside-5-O-glucoside	Flavonoids	Flavones	-	3	16104	23002	27028	67073	77678	69017	1.10943	0.000419371	0.00352105	3.23235	1.69258	up
HJAP128	C34H42O20	Isorhamnetin-3-O-rutinoside-7-O-rhamnoside	Flavonoids	Flavonols	-	2	1221700	1356800	1264700	4382800	3615700	4309400	1.14006	0.00630422	0.0162987	3.20251	1.6792	up
Lmsp002982	C33H40O21	Quercetin-3-O-sophoroside-7-O-rhamnoside	Flavonoids	Flavonols	-	3	905890	921870	964080	203880	246850	237570	1.14355	1.09495e-05	0.000673649	0.24654	-2.02011	down
Lmmp002755	C33H40O21	Quercetin-7-O-rutinoside-4'-O-glucoside	Flavonoids	Flavonols	-	3	164140	153420	130750	423610	543100	270910	1.05146	0.0769467	0.105074	2.76063	1.465	up
HJAP023	C33H40O21	Kaempferol-6,8-di-C-glucoside-7-O-glucoside	Flavonoids	Flavonoid carbonoside	-	3	258590	244590	277610	68132	55848	54866	1.14069	0.000505865	0.0040091	0.229058	-2.12622	down
Lmsp003853	C42H46O23	Quercetin-3-O-(6''-O-p-coumaroyl)sophoroside-7-O-rhamnoside	Flavonoids	Flavonols	-	3	74701	74996	68210	627390	462680	694950	1.1394	0.0169127	0.032085	8.19166	3.03416	up
HJAP136	C39H50O25	Quercetin-3-O-(2''-O-rhamnosyl)rutinoside-7-O-glucoside	Flavonoids	Flavonols	-	3	73359	70692	42690	624500	543080	710280	1.13216	0.00563764	0.0153228	10.056	3.32998	up
Lmhp002374	C39H50O25	Quercetin-3-O-glucosyl(1→4)rhamnoside-7-O-rutinoside	Flavonoids	Flavonols	-	2	77496	54984	65454	552130	513370	412250	1.1377	0.0082055	0.0190637	7.46587	2.90031	up
