# Supplementary material for: Integrative Analysis of the Metabolome and Transcriptome Provides Insights into the Mechanisms of Flavonoid Biosynthesis in Quinoa Seeds at Different Developmental Stages
Source: Metabolites. 2022 Sep 22;12(10):887. doi: 10.3390/metabo12100887 (PMC9609036; doi:10.3390/metabo12100887)
Supplement: Supplementary file 1 [file metabolites-12-00887-s001.zip › Table.S4.xlsx]

## Sheet: Sheet1
Table S4. Number and classification of the detected flavonoid metabolites are shown for FB2 vs. MB2.
Index	Formula	Compounds	Class I	Class II	CAS	Level	FB2-1	FB2-2	FB2-3	MB2-1	MB2-2	MB2-3	VIP	p_value	FDR	Fold_Change	Log2FC	Type
MWSHY0124	C15H12O4	Pinocembrin (Dihydrochrysin)	Flavonoids	Flavanones	480-39-7	1	164030	247770	327580	15199	45057	17793	1.06328	0.0383771	0.0556534	0.10556	-3.24386	down
pme0376	C15H12O5	Naringenin (5,7,4'-Trihydroxyflavanone)*	Flavonoids	Flavanones	480-41-1	3	210000	181550	215180	35353	47307	39553	1.1151	0.0019303	0.00794717	0.201429	-2.31166	down
mws0914	C15H12O5	3,5,7-Trihydroxyflavanone (Pinobanksin)*	Flavonoids	Flavanonols	548-82-3	3	229210	211610	220510	39567	49272	56883	1.11311	1.7657e-05	0.000707375	0.220347	-2.18215	down
pme1201	C15H14O5	Phloretin	Flavonoids	Chalcones	60-82-2	3	196810	170030	163030	5820.9	6204.1	4102.6	1.11984	0.00348705	0.0113195	0.0304369	-5.03803	down
MWSHY0145	C15H12O6	Eriodictyol (5,7,3',4'-Tetrahydroxyflavanone)	Flavonoids	Flavanones	552-58-9	3	125230	93745	102610	19813	16498	16099	1.11606	0.00985495	0.0211341	0.162974	-2.61729	down
MWSHY0163	C15H12O6	Aromadendrin (Dihydrokaempferol)	Flavonoids	Flavanonols	480-20-6	3	119930	83248	124000	28568	36814	30122	1.09194	0.023561	0.0384794	0.291902	-1.77644	down
mws0058	C16H12O6	Diosmetin (5,7,3'-Trihydroxy-4'-methoxyflavone)	Flavonoids	Flavones	520-34-3	3	9	9	9	2705.4	2557.6	3952	1.1222	0.0202193	0.0342673	341.296	8.41488	up
Zmhp002814	C16H12O6	5,7,8-Tetrahydroxy-6-methoxyflavone	Flavonoids	Flavones	-	3	64121	63584	56525	9	9	9	1.12363	0.001585	0.00704076	0.000146556	-12.7363	down
Zmhp002714	C16H12O6	5,6,7-Tetrahydroxy-8-methoxyflavone	Flavonoids	Flavones	-	3	64121	63584	56525	9	9	9	1.12363	0.001585	0.00704076	0.000146556	-12.7363	down
pmp000001	C16H12O6	Hispidulin (5,7,4'-Trihydroxy-6-methoxyflavone)	Flavonoids	Flavones	1447-88-7	3	54668	32063	33251	8483.8	9030.8	18116	1.01644	0.0458208	0.0643473	0.296966	-1.75163	down
pme2954	C15H10O7	Quercetin	Flavonoids	Flavonols	117-39-5	1	777690	727040	528380	23036	12308	15993	1.11612	0.0128922	0.0247858	0.0252505	-5.30755	down
MWSHY0049	C16H14O6	Hesperetin	Flavonoids	Flavanones	520-33-2	3	9108.8	11043	11776	9	9	9	1.12331	0.00555077	0.0145492	0.000845658	-10.2076	down
mws0044	C15H12O7	Taxifolin(Dihydroquercetin)	Flavonoids	Flavanonols	480-18-2	2	5729400	5087000	7054000	161810	106220	156480	1.11953	0.00971952	0.0209944	0.0237549	-5.39563	down
mws0049	C15H14O7	Gallocatechin	Flavonoids	Flavanols	970-73-0	3	155710	149160	153670	9	9	9	1.12367	0.000160269	0.00204777	5.88825e-05	-14.0518	down
mws0042	C15H14O7	Epigallocatechin	Flavonoids	Flavanols	970-74-1	3	3989900	3427000	4181300	8004.2	8260.7	11427	1.12287	0.00342685	0.0112441	0.0023876	-8.71022	down
MWSHY0068	C16H12O7	Isorhamnetin	Flavonoids	Flavonols	480-19-3	1	111230	73520	58757	9	9	9	1.12286	0.0351147	0.0529137	0.00011088	-13.1387	down
Hmgp001996	C15H10O8	Quercetagetin; 3,3',4',5,6,7-Hexahydroxyflavone	Flavonoids	Flavonols	90-18-6	3	9	9	9	8837.4	6787.1	18024	1.11943	0.0833316	0.105921	1246.24	10.2834	up
mws0917	C17H14O7	3,7-Di-O-methylquercetin	Flavonoids	Flavonols	2068-02-2	3	20784	28057	7450.3	9	9	9	1.11729	0.0897831	0.112429	0.000479648	-11.0257	down
mws0919	C21H20O10	Kaempferol-3-O-rhamnoside (Afzelin)(Kaempferin)	Flavonoids	Flavonols	482-39-3	3	47967	55487	68257	5890.9	4900.3	2501.7	1.09763	0.010649	0.021868	0.0774144	-3.69125	down
MWSHY0100	C20H18O11	Avicularin(Quercetin-3-O-α-L-arabinofuranoside)	Flavonoids	Flavonols	572-30-5	3	2208000	2383400	2447100	252170	258310	256830	1.1231	0.00115979	0.00585192	0.109016	-3.19739	down
Lmdp003509	C20H18O11	Quercetin-3-O-xyloside (Reynoutrin)	Flavonoids	Flavonols	549-32-6	3	2343900	2567500	2642800	153630	150800	215570	1.11939	0.000877875	0.0049068	0.0688359	-3.8607	down
mws1179	C21H22O10	Naringenin-7-O-glucoside (Prunin)	Flavonoids	Flavanones	529-55-5	1	292230	310280	346600	85821	70963	69423	1.11571	0.00211705	0.00831065	0.238336	-2.06893	down
HJN087	C21H22O10	Naringenin-4'-O-glucoside	Flavonoids	Flavanones	-	1	518100	450840	559350	14993	19271	14384	1.12124	0.00401479	0.0119281	0.0318317	-4.97339	down
mws2118	C21H24O10	Phloretin-2'-O-glucoside (Phlorizin)	Flavonoids	Chalcones	60-81-1	1	359410	675280	646170	26171	24879	24432	1.11319	0.0336889	0.0510017	0.0449068	-4.47692	down
Hmcp002316	C21H20O11	Isorhamnetin-3-O-arabinoside	Flavonoids	Flavonols	-	3	310260	476220	368300	39082	42644	19433	1.09498	0.0169281	0.0302057	0.0876002	-3.51292	down
mws0045	C21H20O11	Quercetin-3-O-rhamnoside(Quercitrin)	Flavonoids	Flavonols	522-12-3	1	1047600	1093000	1126100	31399	28080	60042	1.11323	5.76709e-05	0.00121686	0.0365877	-4.7725	down
Lmlp003531	C21H20O11	Luteolin-3'-O-glucoside	Flavonoids	Flavones	-	1	381680	1468600	1188700	155320	152640	70266	1.00461	0.111568	0.135878	0.124458	-3.00627	down
mws0057	C21H22O11	Eriodictyol-7-O-glucoside	Flavonoids	Flavanones	38965-51-4	3	24771	26597	41936	139950	244050	246340	1.08702	0.0337191	0.0510017	6.75577	2.75612	up
Lmtn002796	C21H22O11	Aromadendrin-7-O-glucoside	Flavonoids	Flavanonols	28189-90-4	3	1381700	1574600	1500900	41136	48679	52726	1.12241	0.00147227	0.0066449	0.0319799	-4.96669	down
Lmsp004301	C21H22O11	3',5,5',7-Tetrahydroxyflavanone-7-O-glucoside	Flavonoids	Flavanones	-	3	37601	59611	33951	306370	259960	213620	1.09739	0.0100183	0.0212448	5.94642	2.57202	up
HJN041	C21H24O11	Epicatechin glucoside	Flavonoids	Flavanols	-	3	7784100	5703200	7240800	1031300	1047900	1162300	1.11757	0.0109747	0.022266	0.156382	-2.67685	down
Hmpn005101	C21H24O11	Sieboldin	Flavonoids	Chalcones	18777-73-6	3	37601	59611	33951	306370	259960	213620	1.09739	0.0100183	0.0212448	5.94642	2.57202	up
Lmzn001894	C21H18O12	Kaempferol-3-O-glucuronide	Flavonoids	Flavonols	22688-78-4	1	44078000	44595000	49812000	1602000	1542600	1643900	1.12331	0.00168027	0.0073479	0.0345778	-4.85401	down
MWSHY0121	C21H18O12	Luteolin-7-O-glucuronide	Flavonoids	Flavones	29741-10-4	1	54720000	57709000	53729000	2050800	1842900	1993100	1.12337	0.000485659	0.00372633	0.0354289	-4.81893	down
Hmcp002539	C22H22O11	Isorhamnetin-3-O-rhamnoside	Flavonoids	Flavonols	-	3	184860	363850	313530	27964	23785	21038	1.10462	0.0384841	0.0556657	0.0844162	-3.56634	down
Lmdp003286	C21H20O12	Isohyperoside	Flavonoids	Flavonols	35589-21-0	3	14615000	11056000	10408000	4421500	4125700	3902800	1.10026	0.0252069	0.040523	0.345076	-1.53501	down
Hmcn001884	C21H20O12	6-Hydroxyluteolin 5-glucoside	Flavonoids	Flavones	-	2	9	9	9	1655900	1135400	1216700	1.12347	0.0143285	0.0269337	148444	17.1796	up
MWSHY0046	C21H20O12	Quercetin-3-O-glucoside (Isoquercitrin)*	Flavonoids	Flavonols	482-35-9	1	15086000	13523000	14468000	3876600	3266100	3675600	1.1198	0.000490173	0.00372708	0.251139	-1.99344	down
MWSHY0113	C21H20O12	Quercetin-3-O-galactoside (Hyperin)*	Flavonoids	Flavonols	482-36-0	1	15103000	12404000	11439000	3561700	2747800	3617700	1.10719	0.00912051	0.0199941	0.254897	-1.97202	down
pmp000583	C22H20O12	Diosmetin-7-O-glucuronide	Flavonoids	Flavones	35110-20-4	3	5157300	3977800	8917900	1056100	1002400	1187300	1.07872	0.0800664	0.102543	0.179793	-2.47559	down
Lmqp003647	C21H18O13	Herbacetin-3-O-glucuronide	Flavonoids	Flavonols	-	1	11635000	10175000	11298000	654820	585610	599640	1.123	0.00175171	0.00754308	0.0555778	-4.16935	down
Lmfn003760	C21H18O13	Quercetin-4'-O-glucuronide	Flavonoids	Flavonols	201463-36-7	1	7027600	6351600	6933500	284960	356840	273230	1.12172	0.00091581	0.00501912	0.0450472	-4.47242	down
Lmjp003044	C22H22O12	Isorhamnetin-3-O-Glucoside*	Flavonoids	Flavonols	5041-82-7	1	5258000	6356300	4160600	678550	567400	573140	1.11462	0.0178019	0.031367	0.115315	-3.11634	down
Hmcp002207	C22H22O12	Isorhamnetin-7-O-glucoside (Brassicin)*	Flavonoids	Flavonols	6743-96-0	1	4499400	6540800	3996600	667530	637920	557580	1.1102	0.0297905	0.0463897	0.123898	-3.01277	down
Hmgp002036	C22H22O12	Nepetin-7-O-glucoside(Nepitrin)	Flavonoids	Flavones	569-90-4	1	4498400	5246900	3734600	600680	530420	528190	1.11764	0.0118675	0.0232934	0.123094	-3.02217	down
Lmmn003398	C23H22O12	Kaempferol-3-O-(6''-O-acetyl)glucoside	Flavonoids	Flavonols	-	3	185050	230510	238440	23889	19560	15596	1.11481	0.00611253	0.0151735	0.0902829	-3.4694	down
pmn001642	C23H20O13	Kaempferol-3-O-(2''-O-acetyl)glucuronide	Flavonoids	Flavonols	-	3	58789	74857	61975	9	9	9	1.12345	0.00562792	0.0146153	0.000138022	-12.8228	down
pmn001644	C23H20O14	Quercetin-3-O-(2''-O-acetyl)glucuronide	Flavonoids	Flavonols	-	3	19384	12667	37932	9	9	9	1.11993	0.0908907	0.113647	0.000385808	-11.3398	down
pmb0608	C25H24O14	Chrysoeriol-7-O-(6''-malonyl)glucoside	Flavonoids	Flavones	-	3	158750	160190	179590	9	9	9	1.12362	0.00163126	0.00720827	5.41592e-05	-14.1724	down
pmb3114	C30H26O11	Epicatechin-epiafzelechin	Flavonoids	Flavanols	-	3	126450	129320	110110	5896.1	4030.5	4016.8	1.11965	0.00236775	0.00872654	0.0381092	-4.71372	down
HJAP064	C25H24O15	Isorhamnetin-3-O-(6''-malonyl)glucoside	Flavonoids	Flavonols	-	2	170590	222690	154510	481610	421210	483160	1.0899	0.000646988	0.00420045	2.53013	1.33921	up
Lmmp003306	C25H26O15	Quercetin-3-O-xylosyl(1→2)arabinoside	Flavonoids	Flavonols	-	1	38928	42693	51206	214120	217030	183110	1.11534	0.0021499	0.0083332	4.62451	2.2093	up
MWSHY0201	C27H30O14	Kaempferol-3,7-O-dirhamnoside (Kaempferitrin)	Flavonoids	Flavonols	482-38-2	2	3180000	2787100	4213200	14069	18105	27155	1.11967	0.0155162	0.0284688	0.00582782	-7.42283	down
pmb2586	C30H26O13	Gallocatechin-(4α→8)-catechin	Flavonoids	Flavanols	-	3	12855	17092	23480	4246.8	1369.6	2852.3	1.04637	0.0326971	0.0501752	0.15851	-2.65736	down
Zmjp003291	C27H30O15	Vitexin-2''-O-galactoside	Flavonoids	Flavonoid carbonoside	-	3	7343.5	12768	9093	67899	63824	37386	1.08254	0.0364611	0.0540829	5.79051	2.53369	up
Lmnp002413	C27H30O15	Luteolin-6-C-glucoside-7-O-rhamnoside	Flavonoids	Flavonoid carbonoside	-	3	173220	126550	182660	802130	819170	642050	1.10625	0.00531592	0.0141089	4.69156	2.23007	up
MWSHY0050	C27H30O15	Kaempferol-3-O-rutinoside(Nicotiflorin)*	Flavonoids	Flavonols	17650-84-9	3	3566000	5494300	3849500	762750	794780	694580	1.10863	0.0272123	0.0432527	0.17445	-2.51912	down
pmp000593	C27H30O15	Luteolin-7-O-rutinoside*	Flavonoids	Flavones	3563-98-2	3	4880100	5019800	4734600	20487000	22139000	24353000	1.12073	0.00393452	0.0118176	4.57679	2.19434	up
MWSslk146	C27H30O15	4'-O-Glucosylvitexin	Flavonoids	Flavonoid carbonoside	38950-94-6	3	7343.5	12768	9093	67899	63824	37386	1.08254	0.0364611	0.0540829	5.79051	2.53369	up
Lmtp004044	C26H28O16	Quercetin-3-O-apiosyl(1→2)galactoside*	Flavonoids	Flavonols	-	3	664930	473950	822050	15420000	14426000	9305600	1.11144	0.0223048	0.0370576	19.9658	4.31946	up
Lmjp002596	C26H28O16	Quercetin-3-O-sambubioside*	Flavonoids	Flavonols	83048-35-5	3	759920	594560	782170	14716000	12259000	15543000	1.12014	0.00519468	0.0138744	19.8994	4.31465	up
MWSHY0092	C27H32O15	Eriodictyol-7-O-Rutinoside (Eriocitrin)	Flavonoids	Flavanones	13463-28-0	3	241600	121270	148640	741940	798630	436330	1.03946	0.0386902	0.0558197	3.86483	1.95041	up
Lmmp000897	C30H26O14	Gallocatechin-(4α→8)-gallocatechin	Flavonoids	Flavanols	-	3	9	9	9	15108	16551	36505	1.1204	0.0813016	0.103653	2524.59	11.3018	up
pmb0665	C27H30O16	Orientin-7-O-glucoside	Flavonoids	Flavonoid carbonoside	-	3	554680	511560	347140	132100	129220	138240	1.09448	0.0330747	0.0506158	0.282698	-1.82267	down
Zmjp003031	C27H30O16	Orientin-2''-O-galactoside	Flavonoids	Flavonoid carbonoside	-	3	95350	64316	80021	517580	443510	204750	1.04214	0.080832	0.103211	4.86401	2.28215	up
Lmjp002461	C27H30O16	Quercetin-3-O-neohesperidoside	Flavonoids	Flavonols	117611-67-3	1	50975000	48479000	53899000	7936800	8212200	9945200	1.1199	0.000332088	0.00299583	0.170158	-2.55506	down
Zmxp003107	C27H30O16	Luteolin-7,3'-di-O-glucoside	Flavonoids	Flavones	52187-80-1	3	247190	179910	171430	12263	36265	15092	1.07611	0.0116251	0.0230319	0.106294	-3.23387	down
Lmyn001269	C27H30O16	Kaempferol-3-O-sophoroside	Flavonoids	Flavonols	19895-95-5	3	1382600	1125900	1348000	21173	22880	24860	1.12299	0.00402786	0.0119281	0.0178693	-5.80637	down
Zmxp002867	C28H32O16	Chrysoeriol-5,7-di-O-glucoside	Flavonoids	Flavones	-	3	35040	28186	15394	96856	125400	85617	1.04882	0.0112194	0.0224389	3.91596	1.96937	up
MWSHY0064	C28H32O16	Isorhamnetin-3-O-neohesperidoside*	Flavonoids	Flavonols	55033-90-4	1	2905600	3622400	3677200	381470	241390	313050	1.11452	0.00540979	0.0142927	0.0917091	-3.44679	down
Zmxp004480	C28H32O16	Chrysoeriol-7-O-gentiobioside	Flavonoids	Flavones	-	3	43744	38003	28529	163290	156720	109320	1.08698	0.0191941	0.0330609	3.89323	1.96097	up
MWSHY0135	C28H32O16	Isorhamnetin-3-O-rutinoside (Narcissin)*	Flavonoids	Flavonols	604-80-8	1	3084000	3501100	3937900	323360	373740	346790	1.12061	0.00589448	0.0148506	0.0992008	-3.3335	down
Zmcp002666	C27H30O17	Quercetin-3,7-Di-O-glucoside	Flavonoids	Flavonols	-	1	64626	56523	70323	10438	16987	20993	1.07527	0.000949384	0.00510369	0.252872	-1.98352	down
MWSHY0162	C27H30O17	Quercetin-3-O-sophoroside (Baimaside)	Flavonoids	Flavonols	18609-17-1	1	717770	519440	831760	57978	50852	62844	1.11571	0.0200632	0.0341364	0.0829756	-3.59117	down
pmb0618	C28H34O16	Hesperetin-8-C-glucoside-3'-O-glucoside	Flavonoids	Flavonoid carbonoside	-	3	262510	220910	210190	20575	20298	27803	1.11806	0.00497234	0.0137186	0.0990124	-3.33625	down
Lmgp004959	C29H34O16	Tricin-7-O-neohesperidoside*	Flavonoids	Flavones	53766-40-8	3	31667	24821	27965	9408.4	10049	12131	1.10082	0.00571464	0.0146649	0.374035	-1.41875	down
Hmcp001578	C28H32O17	Isorhamnetin-3,7-O-diglucoside	Flavonoids	Flavonols	6758-51-6	2	19218	11596	17077	9	9	9	1.12288	0.0196418	0.0335581	0.00056378	-10.7926	down
Lmmp003266	C29H30O19	Quercetin-3-O-(2''-O-malonyl)glucoside-7-O-arabinoside	Flavonoids	Flavonols	-	1	10096	19050	17733	157320	164880	156660	1.10844	3.12005e-06	0.000438887	10.2148	3.35259	up
Xmyp004678	C32H38O19	Kaempferol-3-O-(2-O-Xylosyl-6-O-Rhamnosyl)Glucoside	Flavonoids	Flavonols	-	1	263530	167670	152920	5120800	3822400	4137100	1.11511	0.00830522	0.0186923	22.3932	4.48499	up
Zmlp003063	C33H40O19	Luteolin-7-O-(2''-O-rhamnosyl)rutinoside*	Flavonoids	Flavones	-	3	193100	166900	110100	1097700	1118900	1096700	1.1074	0.000264717	0.00265977	7.04807	2.81723	up
mws1035	C33H40O19	Kaempferol-3-O-robinoside-7-O-rhamnoside (Robinin)*	Flavonoids	Flavonols	301-19-9	3	155900	111210	105520	814580	698030	815950	1.11149	0.00114321	0.00581916	6.24899	2.64362	up
Lmsp003881	C33H40O19	Kaempferol-3-O-rutinoside-7-O-rhamnoside	Flavonoids	Flavonols	-	1	11054000	6894700	5280300	52456000	46379000	46853000	1.09352	0.000106979	0.00162744	6.27182	2.64888	up
HJAP061	C32H38O20	Quercetin-3-O-(2''-O-arabinosyl)rutinoside	Flavonoids	Flavonols	-	1	3288300	3204900	2832500	54151000	52248000	54824000	1.12293	0.000151195	0.00202554	17.288	4.1117	up
Hmcp001618	C32H38O20	Quercetin-3-O-(2''-O-Xylosyl)rutinoside	Flavonoids	Flavonols	129235-39-8	3	76957	62209	50887	1034400	1028200	988860	1.11929	9.42185e-06	0.000679491	16.0558	4.00503	up
Hmqp002870	C32H38O20	Luteolin-7-O-Sophoroside-5-O-arabinoside	Flavonoids	Flavones	-	3	501420	368250	267180	2736500	2591300	1748700	1.09027	0.0193872	0.0333047	6.22466	2.63799	up
Zmgp002857	C33H40O20	Quercetin-3-O-α-rhamnosyl (1→2)-[α-rhamnosyl (1→6)]-β-glucoside	Flavonoids	Flavonols	-	3	703560	809530	770950	1621200	1811000	1356900	1.09042	0.0194815	0.0333517	2.09677	1.06817	up
Lmpp003268	C33H40O20	Kaempferol-3-O-rutinoside-7-O-glucoside	Flavonoids	Flavonols	-	3	17847	9579.2	6673	85716	85587	95692	1.08356	8.09156e-05	0.00148463	7.82995	2.969	up
Lmsp003161	C33H40O20	Kaempferol-3-O-sophoroside-7-O-rhamnoside	Flavonoids	Flavonols	-	3	98446	115960	103270	54295	50196	43317	1.09755	0.00176532	0.00756308	0.465279	-1.10383	down
Hmcp001329	C32H38O21	Quercetin-3-O-xylosyl(1→2)glucosyl(1→2)glucoside	Flavonoids	Flavonols	-	3	9	9	9	36155	27339	27511	1.12341	0.00908515	0.0199684	3370.56	11.7188	up
pmb0592	C34H42O20	Chrysoeriol-7-O-rutinoside-5-O-glucoside	Flavonoids	Flavones	-	3	16104	23002	27028	64215	58378	57998	1.07597	0.00122091	0.00597004	2.73068	1.44926	up
HJAP128	C34H42O20	Isorhamnetin-3-O-rutinoside-7-O-rhamnoside	Flavonoids	Flavonols	-	2	1221700	1356800	1264700	3205500	3735800	3460800	1.11744	0.00307942	0.0104379	2.70662	1.43649	up
Lmsp002982	C33H40O21	Quercetin-3-O-sophoroside-7-O-rhamnoside	Flavonoids	Flavonols	-	3	905890	921870	964080	139560	114020	143560	1.12059	2.85056e-05	0.000962348	0.14225	-2.8135	down
Lmmp002755	C33H40O21	Quercetin-7-O-rutinoside-4'-O-glucoside	Flavonoids	Flavonols	-	3	164140	153420	130750	460490	391480	498740	1.10549	0.00649119	0.015834	3.01289	1.59115	up
HJAP023	C33H40O21	Kaempferol-6,8-di-C-glucoside-7-O-glucoside	Flavonoids	Flavonoid carbonoside	-	3	258590	244590	277610	26134	38069	33423	1.11682	0.000580127	0.00396265	0.125035	-2.9996	down
Lmsp003853	C42H46O23	Quercetin-3-O-(6''-O-p-coumaroyl)sophoroside-7-O-rhamnoside	Flavonoids	Flavonols	-	3	74701	74996	68210	702580	592630	705600	1.12153	0.00378557	0.0116183	9.18194	3.1988	up
HJAP136	C39H50O25	Quercetin-3-O-(2''-O-rhamnosyl)rutinoside-7-O-glucoside	Flavonoids	Flavonols	-	3	73359	70692	42690	684730	565030	717030	1.10928	0.00449997	0.0127022	10.5322	3.39673	up
Lmhp002374	C39H50O25	Quercetin-3-O-glucosyl(1→4)rhamnoside-7-O-rutinoside	Flavonoids	Flavonols	-	2	77496	54984	65454	529080	562880	622040	1.11737	0.00183467	0.00774229	8.65945	3.11428	up
