# Supplementary material for: Integrative Analysis of the Metabolome and Transcriptome Provides Insights into the Mechanisms of Flavonoid Biosynthesis in Quinoa Seeds at Different Developmental Stages
Source: Metabolites. 2022 Sep 22;12(10):887. doi: 10.3390/metabo12100887 (PMC9609036; doi:10.3390/metabo12100887)
Supplement: Supplementary file 1 [file metabolites-12-00887-s001.zip › Table.S5.xlsx]

## Sheet: Sheet1
Table S5. Number and classification of the detected flavonoid metabolites are shown for RB2 vs. DB2.
Index	Formula	Compounds	Class I	Class II	CAS	Level	RB2-1	RB2-2	RB2-3	DB2-1	DB2-2	DB2-3	VIP	p_value	FDR	Fold_Change	Log2FC	Type
MWSHY0124	C15H12O4	Pinocembrin (Dihydrochrysin)	Flavonoids	Flavanones	480-39-7	1	79991	68308	53070	17947	19027	30533	1.15828	0.0147235	0.0370506	0.33524	-1.57673	down
MWSHY0145	C15H12O6	Eriodictyol (5,7,3',4'-Tetrahydroxyflavanone)	Flavonoids	Flavanones	552-58-9	3	134020	125720	96920	54266	51606	60185	1.18675	0.0252072	0.0550509	0.465589	-1.10287	down
MWSHY0065	C15H14O6	Catechin	Flavonoids	Flavanols	154-23-4	1	20438000	17568000	16806000	4695100	5452200	3823300	1.21481	0.00235654	0.0119777	0.254882	-1.9721	down
MWSHY0049	C16H14O6	Hesperetin	Flavonoids	Flavanones	520-33-2	3	8640.1	6695	6121.3	9	9	9	1.23353	0.0111947	0.0308403	0.00125837	-9.63423	down
mws0917	C17H14O7	3,7-Di-O-methylquercetin	Flavonoids	Flavonols	2068-02-2	3	2278.6	2074.7	910.99	9	9	9	1.22644	0.0546987	0.0979002	0.0051289	-7.60714	down
HJN087	C21H22O10	Naringenin-4'-O-glucoside	Flavonoids	Flavanones	-	1	117410	118910	109370	52195	43934	55669	1.21552	0.00017007	0.00354895	0.439116	-1.18733	down
Lmtn002796	C21H22O11	Aromadendrin-7-O-glucoside	Flavonoids	Flavanonols	28189-90-4	3	628620	607980	635700	116830	123330	124450	1.23366	9.95415e-05	0.00288955	0.194739	-2.36039	down
pmp000583	C22H20O12	Diosmetin-7-O-glucuronide	Flavonoids	Flavones	35110-20-4	3	5769000	6137100	7183700	2321200	3958600	2032700	1.10461	0.0105489	0.0296425	0.435442	-1.19945	down
Lmmn003398	C23H22O12	Kaempferol-3-O-(6''-O-acetyl)glucoside	Flavonoids	Flavonols	-	3	89405	75050	83322	39594	21445	34713	1.15015	0.00226947	0.0118097	0.386444	-1.37167	down
pmn001642	C23H20O13	Kaempferol-3-O-(2''-O-acetyl)glucuronide	Flavonoids	Flavonols	-	3	30693	30134	25337	9	9	9	1.23403	0.00348662	0.0146961	0.000313356	-11.6399	down
pmp000237	C26H26O15	Apigenin-6-C-(2''-glucuronyl)xyloside	Flavonoids	Flavonoid carbonoside	-	3	95861	148350	73150	16146	12041	19172	1.195	0.0549709	0.0981789	0.149228	-2.74441	down
MWSHY0201	C27H30O14	Kaempferol-3,7-O-dirhamnoside (Kaempferitrin)	Flavonoids	Flavonols	482-38-2	2	375630	481590	329950	58514	69386	82724	1.21678	0.0166483	0.0403291	0.177417	-2.49478	down
MWSHY0050	C27H30O15	Kaempferol-3-O-rutinoside(Nicotiflorin)*	Flavonoids	Flavonols	17650-84-9	3	3681000	3223000	3671800	1631900	1363700	1673900	1.21333	0.000889726	0.00721192	0.441527	-1.17943	down
Lmjp002461	C27H30O16	Quercetin-3-O-neohesperidoside	Flavonoids	Flavonols	117611-67-3	1	24295000	49222000	47474000	12150000	14521000	14717000	1.1212	0.0792178	0.12942	0.342075	-1.54762	down
Hmgp003086	C29H34O16	Tricin-7-O-rutinoside*	Flavonoids	Flavones	-	3	18609	20969	13695	7693.9	5130.4	11723	1.03281	0.029658	0.0618853	0.460783	-1.11784	down
Lmgp004959	C29H34O16	Tricin-7-O-neohesperidoside*	Flavonoids	Flavones	53766-40-8	3	27064	20793	17093	11966	9309	10263	1.1347	0.0536831	0.0964921	0.485574	-1.04224	down
Hmcp001578	C28H32O17	Isorhamnetin-3,7-O-diglucoside	Flavonoids	Flavonols	6758-51-6	2	7598.5	18634	13452	9	9	9	1.23112	0.0535219	0.0964081	0.000680366	-10.5214	down
Lmmp003266	C29H30O19	Quercetin-3-O-(2''-O-malonyl)glucoside-7-O-arabinoside	Flavonoids	Flavonols	-	1	135750	64566	102210	258340	166340	260350	1.04632	0.0331916	0.0667793	2.26437	1.17911	up
Hmcp001329	C32H38O21	Quercetin-3-O-xylosyl(1→2)glucosyl(1→2)glucoside	Flavonoids	Flavonols	-	3	11185	7944.6	16733	47842	39771	40408	1.1689	0.00108738	0.00782476	3.56976	1.83583	up
pmb0592	C34H42O20	Chrysoeriol-7-O-rutinoside-5-O-glucoside	Flavonoids	Flavones	-	3	33056	28413	45088	67073	77678	69017	1.14617	0.0060929	0.0208793	2.00614	1.00442	up
