# Supplementary material for: Integrative Analysis of the Metabolome and Transcriptome Provides Insights into the Mechanisms of Flavonoid Biosynthesis in Quinoa Seeds at Different Developmental Stages
Source: Metabolites. 2022 Sep 22;12(10):887. doi: 10.3390/metabo12100887 (PMC9609036; doi:10.3390/metabo12100887)
Supplement: Supplementary file 1 [file metabolites-12-00887-s001.zip › Table.S6.xlsx]

## Sheet: Sheet1
Table S6. Number and classification of the detected flavonoid metabolites are shown for RB2 vs. MB2.
Index	Formula	Compounds	Class I	Class II	CAS	Level	RB2-1	RB2-2	RB2-3	MB2-1	MB2-2	MB2-3	VIP	p_value	FDR	Fold_Change	Log2FC	Type
pme0376	C15H12O5	Naringenin (5,7,4'-Trihydroxyflavanone)*	Flavonoids	Flavanones	480-41-1	3	100090	104350	80166	35353	47307	39553	1.12526	0.00845206	0.0221702	0.429411	-1.21957	down
mws0914	C15H12O5	3,5,7-Trihydroxyflavanone (Pinobanksin)*	Flavonoids	Flavanonols	548-82-3	3	99625	127220	93408	39567	49272	56883	1.09939	0.0165404	0.0350807	0.455021	-1.13599	down
MWSHY0145	C15H12O6	Eriodictyol (5,7,3',4'-Tetrahydroxyflavanone)	Flavonoids	Flavanones	552-58-9	3	134020	125720	96920	19813	16498	16099	1.15989	0.0113915	0.0268674	0.146947	-2.76664	down
MWSHY0065	C15H14O6	Catechin	Flavonoids	Flavanols	154-23-4	1	20438000	17568000	16806000	490160	407470	394770	1.16744	0.00379888	0.0133835	0.0235788	-5.40637	down
mws0058	C16H12O6	Diosmetin (5,7,3'-Trihydroxy-4'-methoxyflavone)	Flavonoids	Flavones	520-34-3	3	9124	31247	11975	2705.4	2557.6	3952	1.04707	0.17391	0.216936	0.17604	-2.50602	down
pme2954	C15H10O7	Quercetin	Flavonoids	Flavonols	117-39-5	1	47963	57544	44829	23036	12308	15993	1.10138	0.00299739	0.0119425	0.341482	-1.55012	down
MWSHY0049	C16H14O6	Hesperetin	Flavonoids	Flavanones	520-33-2	3	8640.1	6695	6121.3	9	9	9	1.16813	0.0111947	0.0266123	0.00125837	-9.63423	down
mws0044	C15H12O7	Taxifolin(Dihydroquercetin)	Flavonoids	Flavanonols	480-18-2	2	444550	462810	492750	161810	106220	156480	1.13963	0.000186383	0.00326947	0.303198	-1.72167	down
mws0049	C15H14O7	Gallocatechin	Flavonoids	Flavanols	970-73-0	3	25375	19245	12535	9	9	9	1.16698	0.0358847	0.0610403	0.0004724	-11.0477	down
mws0042	C15H14O7	Epigallocatechin	Flavonoids	Flavanols	970-74-1	3	356500	457950	386440	8004.2	8260.7	11427	1.16556	0.00581771	0.0172922	0.0230595	-5.4385	down
MWSHY0068	C16H12O7	Isorhamnetin	Flavonoids	Flavonols	480-19-3	1	1054.3	5376.5	2524.5	9	9	9	1.15227	0.143611	0.186031	0.00301497	-8.37364	down
mws0917	C17H14O7	3,7-Di-O-methylquercetin	Flavonoids	Flavonols	2068-02-2	3	2278.6	2074.7	910.99	9	9	9	1.16135	0.0546987	0.084507	0.0051289	-7.60714	down
mws0919	C21H20O10	Kaempferol-3-O-rhamnoside (Afzelin)(Kaempferin)	Flavonoids	Flavonols	482-39-3	3	25357	19104	38691	5890.9	4900.3	2501.7	1.10097	0.0525539	0.0820972	0.159863	-2.6451	down
MWSHY0100	C20H18O11	Avicularin(Quercetin-3-O-α-L-arabinofuranoside)	Flavonoids	Flavonols	572-30-5	3	1727500	1739100	1954700	252170	258310	256830	1.16766	0.00224795	0.0111998	0.141536	-2.82076	down
Lmdp003509	C20H18O11	Quercetin-3-O-xyloside (Reynoutrin)	Flavonoids	Flavonols	549-32-6	3	1762200	1976900	2107700	153630	150800	215570	1.16222	0.00228094	0.0112883	0.0889375	-3.49106	down
HJN087	C21H22O10	Naringenin-4'-O-glucoside	Flavonoids	Flavanones	-	1	117410	118910	109370	14993	19271	14384	1.16313	8.30491e-05	0.00210033	0.140727	-2.82903	down
mws2118	C21H24O10	Phloretin-2'-O-glucoside (Phlorizin)	Flavonoids	Chalcones	60-81-1	1	93341	92772	66386	26171	24879	24432	1.14781	0.0216539	0.041914	0.29894	-1.74207	down
pmp000575	C22H22O10	Acacetin-7-O-glucoside (Tilianin)*	Flavonoids	Flavones	4291-60-5	3	27780	16382	26368	91075	97438	90583	1.13559	0.000263466	0.0036881	3.95712	1.98445	up
pmp000573	C22H22O10	Acacetin-7-O-galactoside*	Flavonoids	Flavones	-	3	25018	16612	36196	88195	126550	72139	1.07733	0.0378275	0.0639573	3.68622	1.88214	up
Hmcp002316	C21H20O11	Isorhamnetin-3-O-arabinoside	Flavonoids	Flavonols	-	3	116360	120190	137540	39082	42644	19433	1.0952	0.000763168	0.0065321	0.270414	-1.88676	down
mws0045	C21H20O11	Quercetin-3-O-rhamnoside(Quercitrin)	Flavonoids	Flavonols	522-12-3	1	608500	563370	608610	31399	28080	60042	1.15157	2.23459e-05	0.000990276	0.0671285	-3.89693	down
Lmtn002796	C21H22O11	Aromadendrin-7-O-glucoside	Flavonoids	Flavanonols	28189-90-4	3	628620	607980	635700	41136	48679	52726	1.16663	2.64254e-05	0.00111251	0.0761315	-3.71536	down
Lmzn001894	C21H18O12	Kaempferol-3-O-glucuronide	Flavonoids	Flavonols	22688-78-4	1	25562000	26396000	27001000	1602000	1542600	1643900	1.16851	0.00026719	0.0036881	0.0606454	-4.04346	down
MWSHY0121	C21H18O12	Luteolin-7-O-glucuronide	Flavonoids	Flavones	29741-10-4	1	31068000	30080000	32305000	2050800	1842900	1993100	1.1683	0.000436328	0.00510261	0.0629921	-3.98869	down
Hmcp002539	C22H22O11	Isorhamnetin-3-O-rhamnoside	Flavonoids	Flavonols	-	3	143000	107810	136780	27964	23785	21038	1.15709	0.00872091	0.0224735	0.187794	-2.41278	down
Lmdp003286	C21H20O12	Isohyperoside	Flavonoids	Flavonols	35589-21-0	3	21731000	19295000	24524000	4421500	4125700	3902800	1.1637	0.00677383	0.0188236	0.189931	-2.39645	down
Hmcn001884	C21H20O12	6-Hydroxyluteolin 5-glucoside	Flavonoids	Flavones	-	2	5706900	5777200	7036300	1655900	1135400	1216700	1.15167	0.00365387	0.0133184	0.21641	-2.20816	down
mws0856	C21H20O12	Quercetin-4'-O-glucoside (Spiraeoside)	Flavonoids	Flavonols	20229-56-5	1	5703000	5594800	6314800	1388000	1283400	1365800	1.16664	0.00206649	0.0108749	0.229222	-2.12518	down
mws1329	C21H20O12	Quercetin-7-O-glucoside*	Flavonoids	Flavonols	491-50-9	1	5223300	6336300	4807200	1322300	1278500	1195200	1.16033	0.0112518	0.0266123	0.231933	-2.10822	down
MWSHY0046	C21H20O12	Quercetin-3-O-glucoside (Isoquercitrin)*	Flavonoids	Flavonols	482-35-9	1	20119000	21595000	18821000	3876600	3266100	3675600	1.1655	0.00153526	0.00906002	0.178711	-2.4843	down
MWSHY0113	C21H20O12	Quercetin-3-O-galactoside (Hyperin)*	Flavonoids	Flavonols	482-36-0	1	17396000	25167000	18266000	3561700	2747800	3617700	1.15364	0.019257	0.0386058	0.163198	-2.6153	down
pme1598	C22H24O11	Hesperetin-5-O-glucoside	Flavonoids	Flavanones	69651-80-5	3	5722100	5720800	5943900	1664500	1804200	1294700	1.15503	0.000179125	0.00320901	0.273966	-1.86793	down
Xmsn002700	C21H22O12	Taxifolin-3'-O-glucoside	Flavonoids	Flavanonols	31106-05-5	3	153690	168140	182210	44842	42829	51007	1.16148	0.00247359	0.011497	0.275133	-1.8618	down
pmp000583	C22H20O12	Diosmetin-7-O-glucuronide	Flavonoids	Flavones	35110-20-4	3	5769000	6137100	7183700	1056100	1002400	1187300	1.16367	0.00572079	0.0172032	0.170028	-2.55616	down
Lmqp003647	C21H18O13	Herbacetin-3-O-glucuronide	Flavonoids	Flavonols	-	1	7223100	7514700	7815200	654820	585610	599640	1.16812	0.000516701	0.00562557	0.0815887	-3.61549	down
Lmfn003760	C21H18O13	Quercetin-4'-O-glucuronide	Flavonoids	Flavonols	201463-36-7	1	3576000	3958100	4119000	284960	356840	273230	1.16549	0.00160468	0.00919141	0.0785225	-3.67075	down
Lmjp003044	C22H22O12	Isorhamnetin-3-O-Glucoside*	Flavonoids	Flavonols	5041-82-7	1	3158700	2350400	3454500	678550	567400	573140	1.15362	0.0177042	0.0366264	0.202942	-2.30086	down
Hmcp002207	C22H22O12	Isorhamnetin-7-O-glucoside (Brassicin)*	Flavonoids	Flavonols	6743-96-0	1	2901500	2038500	3176000	667530	637920	557580	1.14633	0.0250976	0.0465467	0.22955	-2.12312	down
Hmgp002036	C22H22O12	Nepetin-7-O-glucoside(Nepitrin)	Flavonoids	Flavones	569-90-4	1	2600200	2236300	3194100	600680	530420	528190	1.15727	0.016285	0.0347138	0.206621	-2.27494	down
Lmmn003398	C23H22O12	Kaempferol-3-O-(6''-O-acetyl)glucoside	Flavonoids	Flavonols	-	3	89405	75050	83322	23889	19560	15596	1.14973	0.000694799	0.00629054	0.238299	-2.06916	down
pmn001642	C23H20O13	Kaempferol-3-O-(2''-O-acetyl)glucuronide	Flavonoids	Flavonols	-	3	30693	30134	25337	9	9	9	1.16854	0.00348662	0.0128979	0.000313356	-11.6399	down
Hmln002199	C23H22O13	Quercetin-3-O-(6''-O-acetyl)galactoside	Flavonoids	Flavonols	-	3	157800	195850	418150	60239	49175	49822	1.0831	0.128078	0.167978	0.206318	-2.27706	down
pmb0608	C25H24O14	Chrysoeriol-7-O-(6''-malonyl)glucoside	Flavonoids	Flavones	-	3	59938	29652	32690	9	9	9	1.16711	0.0515531	0.0809846	0.000220805	-12.1449	down
pmp000589	C24H22O15	Quercetin-7-O-(6''-malonyl)glucoside	Flavonoids	Flavonols	-	1	1222600	983030	1377500	397640	380300	285870	1.13798	0.01245	0.0285637	0.296894	-1.75198	down
pmb3114	C30H26O11	Epicatechin-epiafzelechin	Flavonoids	Flavanols	-	3	14621	9897.5	16964	5896.1	4030.5	4016.8	1.09375	0.0383671	0.0643528	0.336127	-1.57292	down
MWSHY0201	C27H30O14	Kaempferol-3,7-O-dirhamnoside (Kaempferitrin)	Flavonoids	Flavonols	482-38-2	2	375630	481590	329950	14069	18105	27155	1.15603	0.0134679	0.0301594	0.0499752	-4.32265	down
HJAP148	C26H28O15	Kaempferol-3-O-sambubioside	Flavonoids	Flavonols	27661-51-4	2	291860	284500	285750	106030	87933	130740	1.13851	0.00376905	0.0133835	0.376638	-1.40875	down
pmb2586	C30H26O13	Gallocatechin-(4α→8)-catechin	Flavonoids	Flavanols	-	3	14090	9912.1	18318	4246.8	1369.6	2852.3	1.06754	0.0324231	0.0564055	0.200111	-2.32113	down
MWSHY0050	C27H30O15	Kaempferol-3-O-rutinoside(Nicotiflorin)*	Flavonoids	Flavonols	17650-84-9	3	3681000	3223000	3671800	762750	794780	694580	1.16534	0.00218616	0.0110861	0.212949	-2.23142	down
pmb3002	C28H32O15	Chrysoeriol-7-O-rutinoside	Flavonoids	Flavones	-	3	263330	299120	261750	163660	117590	113410	1.10944	0.00271698	0.0117343	0.47884	-1.06238	down
pmb0665	C27H30O16	Orientin-7-O-glucoside	Flavonoids	Flavonoid carbonoside	-	3	612980	526340	602530	132100	129220	138240	1.16584	0.00344717	0.0128979	0.229388	-2.12414	down
Lmjp002461	C27H30O16	Quercetin-3-O-neohesperidoside	Flavonoids	Flavonols	117611-67-3	1	24295000	49222000	47474000	7936800	8212200	9945200	1.11206	0.0580313	0.0881992	0.215671	-2.2131	down
Lmyn001269	C27H30O16	Kaempferol-3-O-sophoroside	Flavonoids	Flavonols	19895-95-5	3	85432	91943	80745	21173	22880	24860	1.16374	0.00114396	0.00758436	0.26698	-1.90519	down
MWSHY0064	C28H32O16	Isorhamnetin-3-O-neohesperidoside*	Flavonoids	Flavonols	55033-90-4	1	960640	999820	1337400	381470	241390	313050	1.12979	0.0146985	0.0323136	0.283793	-1.81709	down
MWSHY0135	C28H32O16	Isorhamnetin-3-O-rutinoside (Narcissin)*	Flavonoids	Flavonols	604-80-8	1	1134900	1141600	1326200	323360	373740	346790	1.16199	0.00374447	0.0133835	0.289752	-1.78711	down
MWSHY0162	C27H30O17	Quercetin-3-O-sophoroside (Baimaside)	Flavonoids	Flavonols	18609-17-1	1	235150	267570	133060	57978	50852	62844	1.10235	0.0612767	0.0918059	0.270021	-1.88886	down
pmb0618	C28H34O16	Hesperetin-8-C-glucoside-3'-O-glucoside	Flavonoids	Flavonoid carbonoside	-	3	75605	115360	123770	20575	20298	27803	1.13489	0.0285103	0.051084	0.218203	-2.19626	down
Lmgp004959	C29H34O16	Tricin-7-O-neohesperidoside*	Flavonoids	Flavones	53766-40-8	3	27064	20793	17093	9408.4	10049	12131	1.07238	0.0530561	0.0827282	0.486349	-1.03993	down
Lmmp002560	C27H28O18	Quercetin-3-O-(2''-O-glucosyl)glucuronide	Flavonoids	Flavonols	-	3	147530	121860	241530	24569	39061	24920	1.12132	0.058444	0.088507	0.173315	-2.52853	down
Hmcp001578	C28H32O17	Isorhamnetin-3,7-O-diglucoside	Flavonoids	Flavonols	6758-51-6	2	7598.5	18634	13452	9	9	9	1.16553	0.0535219	0.0829935	0.000680366	-10.5214	down
Hmqp003184	C29H30O18	Luteolin-7-O-(6''-malonyl)glucoside-5-O-arabinoside	Flavonoids	Flavones	-	3	41164	38574	41946	11449	21627	15226	1.08882	0.00855633	0.0223047	0.396946	-1.33298	down
Hmcp001329	C32H38O21	Quercetin-3-O-xylosyl(1→2)glucosyl(1→2)glucoside	Flavonoids	Flavonols	-	3	11185	7944.6	16733	36155	27339	27511	1.05135	0.00940738	0.0236368	2.5376	1.34347	up
Lmsp002982	C33H40O21	Quercetin-3-O-sophoroside-7-O-rhamnoside	Flavonoids	Flavonols	-	3	385280	322860	370640	139560	114020	143560	1.1505	0.00192912	0.010346	0.368138	-1.44168	down
HJAP023	C33H40O21	Kaempferol-6,8-di-C-glucoside-7-O-glucoside	Flavonoids	Flavonoid carbonoside	-	3	114650	75213	93299	26134	38069	33423	1.11629	0.0243259	0.0457196	0.344771	-1.53629	down
