# Supplementary material for: Integrative Analysis of the Metabolome and Transcriptome Provides Insights into the Mechanisms of Flavonoid Biosynthesis in Quinoa Seeds at Different Developmental Stages
Source: Metabolites. 2022 Sep 22;12(10):887. doi: 10.3390/metabo12100887 (PMC9609036; doi:10.3390/metabo12100887)
Supplement: Supplementary file 1 [file metabolites-12-00887-s001.zip › Table.S7.xlsx]

## Sheet: Sheet1
Table S7. Number and classification of the detected flavonoid metabolites are shown for DB2 vs. MB2.
Index	Formula	Compounds	Class I	Class II	CAS	Level	DB2-1	DB2-2	DB2-3	MB2-1	MB2-2	MB2-3	VIP	p_value	FDR	Fold_Change	Log2FC	Type
MWSHY0145	C15H12O6	Eriodictyol (5,7,3',4'-Tetrahydroxyflavanone)	Flavonoids	Flavanones	552-58-9	3	54266	51606	60185	19813	16498	16099	1.27979	0.00117826	0.0121678	0.315615	-1.66376	down
MWSHY0163	C15H12O6	Aromadendrin (Dihydrokaempferol)	Flavonoids	Flavanonols	480-20-6	3	80030	79173	62236	28568	36814	30122	1.24647	0.00922132	0.0354765	0.431288	-1.21328	down
MWSHY0065	C15H14O6	Catechin	Flavonoids	Flavanols	154-23-4	1	4695100	5452200	3823300	490160	407470	394770	1.28486	0.0119196	0.0415629	0.0925086	-3.43427	down
mws0044	C15H12O7	Taxifolin(Dihydroquercetin)	Flavonoids	Flavanonols	480-18-2	2	390920	434680	429990	161810	106220	156480	1.25343	0.000343322	0.00679288	0.338096	-1.56449	down
mws0049	C15H14O7	Gallocatechin	Flavonoids	Flavanols	970-73-0	3	15542	16677	9126.5	9	9	9	1.28979	0.0279145	0.0715486	0.000653034	-10.5806	down
mws0042	C15H14O7	Epigallocatechin	Flavonoids	Flavanols	970-74-1	3	227980	192590	232030	8004.2	8260.7	11427	1.2874	0.00339103	0.0213481	0.0424332	-4.55866	down
Hmgp001996	C15H10O8	Quercetagetin; 3,3',4',5,6,7-Hexahydroxyflavone	Flavonoids	Flavonols	90-18-6	3	23920	23920	29401	8837.4	6787.1	18024	1.08196	0.033149	0.0789308	0.43563	-1.19882	down
mws0919	C21H20O10	Kaempferol-3-O-rhamnoside (Afzelin)(Kaempferin)	Flavonoids	Flavonols	482-39-3	3	29158	18720	17954	5890.9	4900.3	2501.7	1.21074	0.0323781	0.0777637	0.201922	-2.30813	down
MWSHY0100	C20H18O11	Avicularin(Quercetin-3-O-α-L-arabinofuranoside)	Flavonoids	Flavonols	572-30-5	3	1513700	1397200	1566400	252170	258310	256830	1.2905	0.00160944	0.0142281	0.171378	-2.54475	down
Lmdp003509	C20H18O11	Quercetin-3-O-xyloside (Reynoutrin)	Flavonoids	Flavonols	549-32-6	3	1393200	1518000	1523600	153630	150800	215570	1.28391	0.000125629	0.00401529	0.117254	-3.09229	down
HJN087	C21H22O10	Naringenin-4'-O-glucoside	Flavonoids	Flavanones	-	1	52195	43934	55669	14993	19271	14384	1.26504	0.00399689	0.0235561	0.320479	-1.6417	down
pmp000575	C22H22O10	Acacetin-7-O-glucoside (Tilianin)*	Flavonoids	Flavones	4291-60-5	3	34551	17329	32664	91075	97438	90583	1.2161	0.00280039	0.0202331	3.30119	1.72299	up
pmp000573	C22H22O10	Acacetin-7-O-galactoside*	Flavonoids	Flavones	-	3	28871	17619	33121	88195	126550	72139	1.20383	0.041711	0.0909761	3.60357	1.84943	up
Hmcp002316	C21H20O11	Isorhamnetin-3-O-arabinoside	Flavonoids	Flavonols	-	3	87595	87355	110240	39082	42644	19433	1.16386	0.0042724	0.0243764	0.354707	-1.4953	down
mws0045	C21H20O11	Quercetin-3-O-rhamnoside(Quercitrin)	Flavonoids	Flavonols	522-12-3	1	414480	290640	436710	31399	28080	60042	1.25793	0.0139186	0.0458153	0.104675	-3.25601	down
Lmlp003531	C21H20O11	Luteolin-3'-O-glucoside	Flavonoids	Flavones	-	1	448090	445410	523600	155320	152640	70266	1.20403	0.00082327	0.010211	0.266901	-1.90562	down
Lmtn002796	C21H22O11	Aromadendrin-7-O-glucoside	Flavonoids	Flavanonols	28189-90-4	3	116830	123330	124450	41136	48679	52726	1.275	0.000125414	0.00401529	0.390941	-1.35498	down
Lmzn001894	C21H18O12	Kaempferol-3-O-glucuronide	Flavonoids	Flavonols	22688-78-4	1	16210000	16265000	14872000	1602000	1542600	1643900	1.29103	0.000986612	0.0113871	0.101136	-3.30563	down
Lmmp003767	C21H18O12	Kaempferol-7-O-glucuronide	Flavonoids	Flavonols	-	2	1877500	1525900	1738100	9	9	124240	1.05502	0.00121775	0.0122023	0.0241677	-5.37078	down
MWSHY0121	C21H18O12	Luteolin-7-O-glucuronide	Flavonoids	Flavones	29741-10-4	1	19842000	19089000	20501000	2050800	1842900	1993100	1.29099	0.000401132	0.00724654	0.099051	-3.33568	down
Hmcp002539	C22H22O11	Isorhamnetin-3-O-rhamnoside	Flavonoids	Flavonols	-	3	77910	84317	92318	27964	23785	21038	1.27703	0.00116872	0.0121678	0.285949	-1.80617	down
Lmdp003286	C21H20O12	Isohyperoside	Flavonoids	Flavonols	35589-21-0	3	18888000	21549000	18386000	4421500	4125700	3902800	1.28772	0.00337313	0.0213481	0.211652	-2.24023	down
Hmcn001884	C21H20O12	6-Hydroxyluteolin 5-glucoside	Flavonoids	Flavones	-	2	6904800	5976000	5945900	1655900	1135400	1216700	1.2755	0.000814547	0.010211	0.212889	-2.23183	down
mws0856	C21H20O12	Quercetin-4'-O-glucoside (Spiraeoside)	Flavonoids	Flavonols	20229-56-5	1	5592600	5635100	6226000	1388000	1283400	1365800	1.28963	0.0016893	0.0147769	0.231309	-2.11211	down
mws1329	C21H20O12	Quercetin-7-O-glucoside*	Flavonoids	Flavonols	491-50-9	1	5490800	5688400	6142300	1322300	1278500	1195200	1.28939	0.00131134	0.0125899	0.21915	-2.19001	down
MWSHY0046	C21H20O12	Quercetin-3-O-glucoside (Isoquercitrin)*	Flavonoids	Flavonols	482-35-9	1	16351000	23534000	14393000	3876600	3266100	3675600	1.26802	0.0344086	0.0801709	0.199313	-2.32689	down
MWSHY0113	C21H20O12	Quercetin-3-O-galactoside (Hyperin)*	Flavonoids	Flavonols	482-36-0	1	16811000	22021000	15732000	3561700	2747800	3617700	1.27595	0.0150854	0.048589	0.181937	-2.45849	down
pme1598	C22H24O11	Hesperetin-5-O-glucoside	Flavonoids	Flavanones	69651-80-5	3	6679400	6209600	7074500	1664500	1804200	1294700	1.27719	0.000235278	0.00543099	0.238605	-2.0673	down
Xmsn002700	C21H22O12	Taxifolin-3'-O-glucoside	Flavonoids	Flavanonols	31106-05-5	3	219750	230040	219580	44842	42829	51007	1.28869	5.61108e-06	0.00155427	0.207177	-2.27106	down
pmp000583	C22H20O12	Diosmetin-7-O-glucuronide	Flavonoids	Flavones	35110-20-4	3	2321200	3958600	2032700	1056100	1002400	1187300	1.17122	0.105139	0.178486	0.390472	-1.35671	down
Lmqp003647	C21H18O13	Herbacetin-3-O-glucuronide	Flavonoids	Flavonols	-	1	5405800	4936000	4898300	654820	585610	599640	1.2904	0.00113582	0.0121678	0.120739	-3.05004	down
Lmfn003760	C21H18O13	Quercetin-4'-O-glucuronide	Flavonoids	Flavonols	201463-36-7	1	2479100	3120000	2851900	284960	356840	273230	1.28542	0.00474849	0.0257908	0.108275	-3.20723	down
Lmjp003044	C22H22O12	Isorhamnetin-3-O-Glucoside*	Flavonoids	Flavonols	5041-82-7	1	2342100	2114000	2158200	678550	567400	573140	1.28514	0.000260872	0.00585904	0.275024	-1.86237	down
Hmcp002207	C22H22O12	Isorhamnetin-7-O-glucoside (Brassicin)*	Flavonoids	Flavonols	6743-96-0	1	2317600	2007500	2175100	667530	637920	557580	1.28381	0.00127765	0.0124909	0.286611	-1.80283	down
Hmgp002036	C22H22O12	Nepetin-7-O-glucoside(Nepitrin)	Flavonoids	Flavones	569-90-4	1	2194100	1916700	1930300	600680	530420	528190	1.28596	0.00229645	0.0176699	0.274667	-1.86425	down
Hmln002199	C23H22O13	Quercetin-3-O-(6''-O-acetyl)galactoside	Flavonoids	Flavonols	-	3	384740	209560	228000	60239	49175	49822	1.25291	0.0572347	0.114058	0.193647	-2.3685	down
pmb0608	C25H24O14	Chrysoeriol-7-O-(6''-malonyl)glucoside	Flavonoids	Flavones	-	3	34129	22794	31840	9	9	9	1.29091	0.0134127	0.0447628	0.000304181	-11.6828	down
pmp000589	C24H22O15	Quercetin-7-O-(6''-malonyl)glucoside	Flavonoids	Flavonols	-	1	1401100	1444400	1019300	397640	380300	285870	1.25681	0.0155544	0.0492773	0.275256	-1.86115	down
MWSHY0201	C27H30O14	Kaempferol-3,7-O-dirhamnoside (Kaempferitrin)	Flavonoids	Flavonols	482-38-2	2	58514	69386	82724	14069	18105	27155	1.22518	0.00718311	0.0314498	0.281682	-1.82786	down
pmb2586	C30H26O13	Gallocatechin-(4α→8)-catechin	Flavonoids	Flavanols	-	3	5710.9	6374.2	9283.4	4246.8	1369.6	2852.3	1.05012	0.0389623	0.0884637	0.396317	-1.33527	down
MWSHY0050	C27H30O15	Kaempferol-3-O-rutinoside(Nicotiflorin)*	Flavonoids	Flavonols	17650-84-9	3	1631900	1363700	1673900	762750	794780	694580	1.26381	0.00931733	0.035517	0.482302	-1.05199	down
pmb0665	C27H30O16	Orientin-7-O-glucoside	Flavonoids	Flavonoid carbonoside	-	3	337260	436110	387650	132100	129220	138240	1.27856	0.0118588	0.0415629	0.344146	-1.53891	down
MWSHY0064	C28H32O16	Isorhamnetin-3-O-neohesperidoside*	Flavonoids	Flavonols	55033-90-4	1	859460	711380	906330	381470	241390	313050	1.23564	0.00307726	0.0207576	0.377814	-1.40425	down
MWSHY0135	C28H32O16	Isorhamnetin-3-O-rutinoside (Narcissin)*	Flavonoids	Flavonols	604-80-8	1	820920	863210	753060	323360	373740	346790	1.27928	0.00134951	0.0126005	0.428317	-1.22325	down
MWSHY0162	C27H30O17	Quercetin-3-O-sophoroside (Baimaside)	Flavonoids	Flavonols	18609-17-1	1	114840	145170	99570	57978	50852	62844	1.22184	0.0358144	0.0823802	0.477429	-1.06664	down
pmb0618	C28H34O16	Hesperetin-8-C-glucoside-3'-O-glucoside	Flavonoids	Flavonoid carbonoside	-	3	65823	74752	102270	20575	20298	27803	1.24897	0.0289499	0.0726808	0.282798	-1.82216	down
Lmmp002560	C27H28O18	Quercetin-3-O-(2''-O-glucosyl)glucuronide	Flavonoids	Flavonols	-	3	91456	85119	84189	24569	39061	24920	1.24235	0.00203992	0.0164425	0.339579	-1.55818	down
