# Supplementary material for: Integrative Analysis of the Metabolome and Transcriptome Provides Insights into the Mechanisms of Flavonoid Biosynthesis in Quinoa Seeds at Different Developmental Stages
Source: Metabolites. 2022 Sep 22;12(10):887. doi: 10.3390/metabo12100887 (PMC9609036; doi:10.3390/metabo12100887)
Supplement: Supplementary file 1 [file metabolites-12-00887-s001.zip › Table.S9.xlsx]

## Sheet: Sheet1
Index	Formula	Compounds	Class I	Class II	CAS	Level	FB2_vs_RB2	FB2_vs_DB2	FB2_vs_MB2	RB2_vs_DB2	RB2_vs_MB2	FB2-1	FB2-2	FB2-3	RB2-1	RB2-2	RB2-3	DB2-1	DB2-2	DB2-3	MB2-1	MB2-2	MB2-3	cpd_ID	kegg_map
MWSHY0124	C15H12O4	Pinocembrin (Dihydrochrysin)	Flavonoids	Flavanones	480-39-7	1	down	down	down	down	FALSE	164030	247770	327580	79991	68308	53070	17947	19027	30533	15199	45057	17793	C09827	ko00941
pme0376	C15H12O5	Naringenin (5,7,4'-Trihydroxyflavanone)*	Flavonoids	Flavanones	480-41-1	3	down	down	down	FALSE	down	210000	181550	215180	100090	104350	80166	54780	72829	72254	35353	47307	39553	C00509	ko00941,ko00943,ko01100,ko01110
mws0914	C15H12O5	3,5,7-Trihydroxyflavanone (Pinobanksin)*	Flavonoids	Flavanonols	548-82-3	3	down	down	down	FALSE	down	229210	211610	220510	99625	127220	93408	67138	75738	84726	39567	49272	56883	C09826	ko00941
pme1201	C15H14O5	Phloretin	Flavonoids	Chalcones	60-82-2	3	down	down	down	FALSE	FALSE	196810	170030	163030	7439.6	6861.5	9297.2	4523.3	4842.8	4987.4	5820.9	6204.1	4102.6	C00774	ko00941,ko01110
MWSHY0145	C15H12O6	Eriodictyol (5,7,3',4'-Tetrahydroxyflavanone)	Flavonoids	Flavanones	552-58-9	3	FALSE	FALSE	down	down	down	125230	93745	102610	134020	125720	96920	54266	51606	60185	19813	16498	16099	C05631	ko00941,ko01100,ko01110
MWSHY0163	C15H12O6	Aromadendrin (Dihydrokaempferol)	Flavonoids	Flavanonols	480-20-6	3	FALSE	FALSE	down	FALSE	FALSE	119930	83248	124000	53925	55598	60718	80030	79173	62236	28568	36814	30122	C00974	ko00941,ko01100,ko01110
MWSHY0065	C15H14O6	Catechin	Flavonoids	Flavanols	154-23-4	1	FALSE	FALSE	FALSE	down	down	9	103850000	9	20438000	17568000	16806000	4695100	5452200	3823300	490160	407470	394770	C06562	ko00941,ko01110
mws0058	C16H12O6	Diosmetin (5,7,3'-Trihydroxy-4'-methoxyflavone)	Flavonoids	Flavones	520-34-3	3	up	up	up	FALSE	down	9	9	9	9124	31247	11975	4104.1	15118	6776	2705.4	2557.6	3952	C10038	--
Zmhp002814	C16H12O6	5,7,8-Tetrahydroxy-6-methoxyflavone	Flavonoids	Flavones	-	3	down	down	down	FALSE	FALSE	64121	63584	56525	9	9	9	9	9	9	9	9	9	--	--
Zmhp002714	C16H12O6	5,6,7-Tetrahydroxy-8-methoxyflavone	Flavonoids	Flavones	-	3	down	down	down	FALSE	FALSE	64121	63584	56525	9	9	9	9	9	9	9	9	9	--	--
pmp000001	C16H12O6	Hispidulin (5,7,4'-Trihydroxy-6-methoxyflavone)	Flavonoids	Flavones	1447-88-7	3	FALSE	FALSE	down	FALSE	FALSE	54668	32063	33251	29056	134100	21153	10124	38609	8544	8483.8	9030.8	18116	C10058	--
pmc1990	C17H16O5	4'-Hydroxy-5,7-dimethoxyflavanone	Flavonoids	Flavanones	-	3	FALSE	up	FALSE	FALSE	FALSE	367780	345860	407080	642120	682430	689480	698060	902460	874170	450400	583020	501340	--	--
pme2954	C15H10O7	Quercetin	Flavonoids	Flavonols	117-39-5	1	down	down	down	FALSE	down	777690	727040	528380	47963	57544	44829	28952	26717	27920	23036	12308	15993	C00389	ko00941,ko00944,ko01100,ko01110
MWSHY0049	C16H14O6	Hesperetin	Flavonoids	Flavanones	520-33-2	3	FALSE	down	down	down	down	9108.8	11043	11776	8640.1	6695	6121.3	9	9	9	9	9	9	C01709	ko00941
mws0044	C15H12O7	Taxifolin(Dihydroquercetin)	Flavonoids	Flavanonols	480-18-2	2	down	down	down	FALSE	down	5729400	5087000	7054000	444550	462810	492750	390920	434680	429990	161810	106220	156480	C01617	ko00941,ko01100,ko01110
mws0049	C15H14O7	Gallocatechin	Flavonoids	Flavanols	970-73-0	3	down	down	down	FALSE	down	155710	149160	153670	25375	19245	12535	15542	16677	9126.5	9	9	9	C12127	ko00941,ko01110
mws0042	C15H14O7	Epigallocatechin	Flavonoids	Flavanols	970-74-1	3	down	down	down	FALSE	down	3989900	3427000	4181300	356500	457950	386440	227980	192590	232030	8004.2	8260.7	11427	C12136	ko00941,ko01110
MWSHY0068	C16H12O7	Isorhamnetin	Flavonoids	Flavonols	480-19-3	1	down	down	down	FALSE	down	111230	73520	58757	1054.3	5376.5	2524.5	9	9	2295.8	9	9	9	C10084	--
Hmgp001996	C15H10O8	Quercetagetin; 3,3',4',5,6,7-Hexahydroxyflavone	Flavonoids	Flavonols	90-18-6	3	up	up	up	FALSE	FALSE	9	9	9	23926	20300	22880	23920	23920	29401	8837.4	6787.1	18024	C10122	--
mws0917	C17H14O7	3,7-Di-O-methylquercetin	Flavonoids	Flavonols	2068-02-2	3	down	down	down	down	down	20784	28057	7450.3	2278.6	2074.7	910.99	9	9	9	9	9	9	C01265	ko00944
mws0919	C21H20O10	Kaempferol-3-O-rhamnoside (Afzelin)(Kaempferin)	Flavonoids	Flavonols	482-39-3	3	down	down	down	FALSE	down	47967	55487	68257	25357	19104	38691	29158	18720	17954	5890.9	4900.3	2501.7	C16911	ko00944
MWSHY0100	C20H18O11	Avicularin(Quercetin-3-O-α-L-arabinofuranoside)	Flavonoids	Flavonols	572-30-5	3	FALSE	FALSE	down	FALSE	down	2208000	2383400	2447100	1727500	1739100	1954700	1513700	1397200	1566400	252170	258310	256830	--	--
Lmdp003509	C20H18O11	Quercetin-3-O-xyloside (Reynoutrin)	Flavonoids	Flavonols	549-32-6	3	FALSE	FALSE	down	FALSE	down	2343900	2567500	2642800	1762200	1976900	2107700	1393200	1518000	1523600	153630	150800	215570	--	--
mws1179	C21H22O10	Naringenin-7-O-glucoside (Prunin)	Flavonoids	Flavanones	529-55-5	1	down	down	down	FALSE	FALSE	292230	310280	346600	139380	139090	132040	100230	94772	94213	85821	70963	69423	C09099	ko00941
HJN087	C21H22O10	Naringenin-4'-O-glucoside	Flavonoids	Flavanones	-	1	down	down	down	down	down	518100	450840	559350	117410	118910	109370	52195	43934	55669	14993	19271	14384	--	--
mws2118	C21H24O10	Phloretin-2'-O-glucoside (Phlorizin)	Flavonoids	Chalcones	60-81-1	1	down	down	down	FALSE	down	359410	675280	646170	93341	92772	66386	47537	47917	41145	26171	24879	24432	C01604	ko00941,ko01110
pmp000575	C22H22O10	Acacetin-7-O-glucoside (Tilianin)*	Flavonoids	Flavones	4291-60-5	3	down	FALSE	FALSE	FALSE	up	56907	72002	45862	27780	16382	26368	34551	17329	32664	91075	97438	90583	--	--
pmp000573	C22H22O10	Acacetin-7-O-galactoside*	Flavonoids	Flavones	-	3	down	down	FALSE	FALSE	up	57585	65513	73688	25018	16612	36196	28871	17619	33121	88195	126550	72139	--	--
Hmcp002316	C21H20O11	Isorhamnetin-3-O-arabinoside	Flavonoids	Flavonols	-	3	down	down	down	FALSE	down	310260	476220	368300	116360	120190	137540	87595	87355	110240	39082	42644	19433	--	--
mws0045	C21H20O11	Quercetin-3-O-rhamnoside(Quercitrin)	Flavonoids	Flavonols	522-12-3	1	FALSE	down	down	FALSE	down	1047600	1093000	1126100	608500	563370	608610	414480	290640	436710	31399	28080	60042	C01750	ko00944
Lmlp003531	C21H20O11	Luteolin-3'-O-glucoside	Flavonoids	Flavones	-	1	FALSE	FALSE	down	FALSE	FALSE	381680	1468600	1188700	675950	641840	148240	448090	445410	523600	155320	152640	70266	--	--
mws0057	C21H22O11	Eriodictyol-7-O-glucoside	Flavonoids	Flavanones	38965-51-4	3	up	up	up	FALSE	FALSE	24771	26597	41936	155590	175260	196240	174240	205830	161180	139950	244050	246340	--	--
Lmtn002796	C21H22O11	Aromadendrin-7-O-glucoside	Flavonoids	Flavanonols	28189-90-4	3	down	down	down	down	down	1381700	1574600	1500900	628620	607980	635700	116830	123330	124450	41136	48679	52726	--	--
Lmsp004301	C21H22O11	3',5,5',7-Tetrahydroxyflavanone-7-O-glucoside	Flavonoids	Flavanones	-	3	up	up	up	FALSE	FALSE	37601	59611	33951	335630	177780	324800	212000	442560	248320	306370	259960	213620	--	--
HJN041	C21H24O11	Epicatechin glucoside	Flavonoids	Flavanols	-	3	down	down	down	FALSE	FALSE	7784100	5703200	7240800	1875600	1856900	1925000	1001600	1253100	1032100	1031300	1047900	1162300	--	--
Hmpn005101	C21H24O11	Sieboldin	Flavonoids	Chalcones	18777-73-6	3	up	up	up	FALSE	FALSE	37601	59611	33951	335630	177780	324800	212000	442560	248320	306370	259960	213620	--	--
Lmzn001894	C21H18O12	Kaempferol-3-O-glucuronide	Flavonoids	Flavonols	22688-78-4	1	FALSE	down	down	FALSE	down	44078000	44595000	49812000	25562000	26396000	27001000	16210000	16265000	14872000	1602000	1542600	1643900	--	--
Lmmp003767	C21H18O12	Kaempferol-7-O-glucuronide	Flavonoids	Flavonols	-	2	down	down	FALSE	FALSE	FALSE	7092100	7202100	5779000	2916800	2548600	3341000	1877500	1525900	1738100	9	9	124240	--	--
MWSHY0121	C21H18O12	Luteolin-7-O-glucuronide	Flavonoids	Flavones	29741-10-4	1	FALSE	down	down	FALSE	down	54720000	57709000	53729000	31068000	30080000	32305000	19842000	19089000	20501000	2050800	1842900	1993100	C03515	ko00944
pmp000579	C22H22O11	Diosmetin-7-O-galactoside*	Flavonoids	Flavones	-	1	up	up	FALSE	FALSE	FALSE	2123900	3079700	1911700	9026800	5281200	8797800	10288000	6783800	10468000	6188100	6310600	3792900	--	--
Hmmp004965	C22H22O11	Diosmetin-7-O-glucoside*	Flavonoids	Flavones	20126-59-4	1	up	up	FALSE	FALSE	FALSE	2123900	3079700	1911700	9026800	5281200	8797800	10288000	6783800	10468000	6188100	6310600	3792900	--	--
Hmcp002539	C22H22O11	Isorhamnetin-3-O-rhamnoside	Flavonoids	Flavonols	-	3	down	down	down	FALSE	down	184860	363850	313530	143000	107810	136780	77910	84317	92318	27964	23785	21038	--	--
Lmdp003286	C21H20O12	Isohyperoside	Flavonoids	Flavonols	35589-21-0	3	FALSE	FALSE	down	FALSE	down	14615000	11056000	10408000	21731000	19295000	24524000	18888000	21549000	18386000	4421500	4125700	3902800	--	--
Hmcn001884	C21H20O12	6-Hydroxyluteolin 5-glucoside	Flavonoids	Flavones	-	2	up	up	up	FALSE	down	9	9	9	5706900	5777200	7036300	6904800	5976000	5945900	1655900	1135400	1216700	--	--
mws0856	C21H20O12	Quercetin-4'-O-glucoside (Spiraeoside)	Flavonoids	Flavonols	20229-56-5	1	up	up	FALSE	FALSE	down	2818200	2328000	2298200	5703000	5594800	6314800	5592600	5635100	6226000	1388000	1283400	1365800	--	--
mws1329	C21H20O12	Quercetin-7-O-glucoside*	Flavonoids	Flavonols	491-50-9	1	up	up	FALSE	FALSE	down	2842300	2127500	2598600	5223300	6336300	4807200	5490800	5688400	6142300	1322300	1278500	1195200	C12639	--
MWSHY0046	C21H20O12	Quercetin-3-O-glucoside (Isoquercitrin)*	Flavonoids	Flavonols	482-35-9	1	FALSE	FALSE	down	FALSE	down	15086000	13523000	14468000	20119000	21595000	18821000	16351000	23534000	14393000	3876600	3266100	3675600	C05623	ko00944,ko01100,ko01110
MWSHY0113	C21H20O12	Quercetin-3-O-galactoside (Hyperin)*	Flavonoids	Flavonols	482-36-0	1	FALSE	FALSE	down	FALSE	down	15103000	12404000	11439000	17396000	25167000	18266000	16811000	22021000	15732000	3561700	2747800	3617700	C10073	--
pme1598	C22H24O11	Hesperetin-5-O-glucoside	Flavonoids	Flavanones	69651-80-5	3	FALSE	up	FALSE	FALSE	down	3166800	3915000	2183700	5722100	5720800	5943900	6679400	6209600	7074500	1664500	1804200	1294700	--	--
Xmsn002700	C21H22O12	Taxifolin-3'-O-glucoside	Flavonoids	Flavanonols	31106-05-5	3	up	up	FALSE	FALSE	down	110350	38004	38343	153690	168140	182210	219750	230040	219580	44842	42829	51007	--	--
pmp000583	C22H20O12	Diosmetin-7-O-glucuronide	Flavonoids	Flavones	35110-20-4	3	FALSE	FALSE	down	down	down	5157300	3977800	8917900	5769000	6137100	7183700	2321200	3958600	2032700	1056100	1002400	1187300	--	--
Lmqp003647	C21H18O13	Herbacetin-3-O-glucuronide	Flavonoids	Flavonols	-	1	FALSE	down	down	FALSE	down	11635000	10175000	11298000	7223100	7514700	7815200	5405800	4936000	4898300	654820	585610	599640	--	--
Lmfn003760	C21H18O13	Quercetin-4'-O-glucuronide	Flavonoids	Flavonols	201463-36-7	1	FALSE	down	down	FALSE	down	7027600	6351600	6933500	3576000	3958100	4119000	2479100	3120000	2851900	284960	356840	273230	--	--
Lmjp003044	C22H22O12	Isorhamnetin-3-O-Glucoside*	Flavonoids	Flavonols	5041-82-7	1	FALSE	down	down	FALSE	down	5258000	6356300	4160600	3158700	2350400	3454500	2342100	2114000	2158200	678550	567400	573140	--	--
Hmcp002207	C22H22O12	Isorhamnetin-7-O-glucoside (Brassicin)*	Flavonoids	Flavonols	6743-96-0	1	FALSE	down	down	FALSE	down	4499400	6540800	3996600	2901500	2038500	3176000	2317600	2007500	2175100	667530	637920	557580	--	--
Hmgp002036	C22H22O12	Nepetin-7-O-glucoside(Nepitrin)	Flavonoids	Flavones	569-90-4	1	FALSE	down	down	FALSE	down	4498400	5246900	3734600	2600200	2236300	3194100	2194100	1916700	1930300	600680	530420	528190	--	--
Lmmn003398	C23H22O12	Kaempferol-3-O-(6''-O-acetyl)glucoside	Flavonoids	Flavonols	-	3	down	down	down	down	down	185050	230510	238440	89405	75050	83322	39594	21445	34713	23889	19560	15596	--	--
pmn001642	C23H20O13	Kaempferol-3-O-(2''-O-acetyl)glucuronide	Flavonoids	Flavonols	-	3	down	down	down	down	down	58789	74857	61975	30693	30134	25337	9	9	9	9	9	9	--	--
Hmln002199	C23H22O13	Quercetin-3-O-(6''-O-acetyl)galactoside	Flavonoids	Flavonols	-	3	up	up	FALSE	FALSE	down	32147	49493	67475	157800	195850	418150	384740	209560	228000	60239	49175	49822	--	--
pmn001644	C23H20O14	Quercetin-3-O-(2''-O-acetyl)glucuronide	Flavonoids	Flavonols	-	3	down	down	down	FALSE	FALSE	19384	12667	37932	9	9	9	9	9	9	9	9	9	--	--
pmb0608	C25H24O14	Chrysoeriol-7-O-(6''-malonyl)glucoside	Flavonoids	Flavones	-	3	down	down	down	FALSE	down	158750	160190	179590	59938	29652	32690	34129	22794	31840	9	9	9	--	--
pmp000589	C24H22O15	Quercetin-7-O-(6''-malonyl)glucoside	Flavonoids	Flavonols	-	1	up	up	FALSE	FALSE	down	443800	335760	354380	1222600	983030	1377500	1401100	1444400	1019300	397640	380300	285870	--	--
pmb3114	C30H26O11	Epicatechin-epiafzelechin	Flavonoids	Flavanols	-	3	down	down	down	FALSE	down	126450	129320	110110	14621	9897.5	16964	6460.5	6478.2	11693	5896.1	4030.5	4016.8	--	--
HJAP064	C25H24O15	Isorhamnetin-3-O-(6''-malonyl)glucoside	Flavonoids	Flavonols	-	2	up	up	up	FALSE	FALSE	170590	222690	154510	428620	395550	366080	588010	608500	557750	481610	421210	483160	--	--
Lmmp003306	C25H26O15	Quercetin-3-O-xylosyl(1→2)arabinoside	Flavonoids	Flavonols	-	1	up	up	up	FALSE	FALSE	38928	42693	51206	202740	156940	231580	267540	235730	255910	214120	217030	183110	--	--
pmp000237	C26H26O15	Apigenin-6-C-(2''-glucuronyl)xyloside	Flavonoids	Flavonoid carbonoside	-	3	down	down	FALSE	down	FALSE	873080	1036400	901750	95861	148350	73150	16146	12041	19172	18987	9	8101.4	--	--
MWSHY0201	C27H30O14	Kaempferol-3,7-O-dirhamnoside (Kaempferitrin)	Flavonoids	Flavonols	482-38-2	2	down	down	down	down	down	3180000	2787100	4213200	375630	481590	329950	58514	69386	82724	14069	18105	27155	C16981	--
HJAP148	C26H28O15	Kaempferol-3-O-sambubioside	Flavonoids	Flavonols	27661-51-4	2	FALSE	FALSE	FALSE	FALSE	down	188010	215150	225210	291860	284500	285750	144750	180850	229850	106030	87933	130740	--	--
pmb2586	C30H26O13	Gallocatechin-(4α→8)-catechin	Flavonoids	Flavanols	-	3	FALSE	down	down	FALSE	down	12855	17092	23480	14090	9912.1	18318	5710.9	6374.2	9283.4	4246.8	1369.6	2852.3	--	--
Zmjp003291	C27H30O15	Vitexin-2''-O-galactoside	Flavonoids	Flavonoid carbonoside	-	3	up	up	up	FALSE	FALSE	7343.5	12768	9093	64365	73122	83672	43767	47260	66030	67899	63824	37386	--	--
Lmnp002413	C27H30O15	Luteolin-6-C-glucoside-7-O-rhamnoside	Flavonoids	Flavonoid carbonoside	-	3	up	up	up	FALSE	FALSE	173220	126550	182660	850980	785860	925670	948990	1002100	958630	802130	819170	642050	--	--
MWSHY0050	C27H30O15	Kaempferol-3-O-rutinoside(Nicotiflorin)*	Flavonoids	Flavonols	17650-84-9	3	FALSE	down	down	down	down	3566000	5494300	3849500	3681000	3223000	3671800	1631900	1363700	1673900	762750	794780	694580	C21833	ko00944,ko01110
pmp000593	C27H30O15	Luteolin-7-O-rutinoside*	Flavonoids	Flavones	3563-98-2	3	up	up	up	FALSE	FALSE	4880100	5019800	4734600	24193000	24325000	27350000	20252000	24544000	22921000	20487000	22139000	24353000	--	--
MWSslk146	C27H30O15	4'-O-Glucosylvitexin	Flavonoids	Flavonoid carbonoside	38950-94-6	3	up	up	up	FALSE	FALSE	7343.5	12768	9093	64365	73122	83672	43767	47260	66030	67899	63824	37386	--	--
Lmtp004044	C26H28O16	Quercetin-3-O-apiosyl(1→2)galactoside*	Flavonoids	Flavonols	-	3	up	up	up	FALSE	FALSE	664930	473950	822050	16154000	16443000	18480000	24265000	19158000	19432000	15420000	14426000	9305600	--	--
Lmjp002596	C26H28O16	Quercetin-3-O-sambubioside*	Flavonoids	Flavonols	83048-35-5	3	up	up	up	FALSE	FALSE	759920	594560	782170	17368000	16273000	20082000	18750000	19668000	18155000	14716000	12259000	15543000	C12637	ko00944
MWSHY0092	C27H32O15	Eriodictyol-7-O-Rutinoside (Eriocitrin)	Flavonoids	Flavanones	13463-28-0	3	up	up	up	FALSE	FALSE	241600	121270	148640	946960	615400	913640	854550	802130	809570	741940	798630	436330	C09732	--
pmb3002	C28H32O15	Chrysoeriol-7-O-rutinoside	Flavonoids	Flavones	-	3	FALSE	FALSE	FALSE	FALSE	down	9	67556	9	263330	299120	261750	204880	323360	195350	163660	117590	113410	--	--
Lmmp000897	C30H26O14	Gallocatechin-(4α→8)-gallocatechin	Flavonoids	Flavanols	-	3	up	up	up	FALSE	FALSE	9	9	9	35333	49952	24596	22798	27187	16270	15108	16551	36505	--	--
pmb0665	C27H30O16	Orientin-7-O-glucoside	Flavonoids	Flavonoid carbonoside	-	3	FALSE	FALSE	down	FALSE	down	554680	511560	347140	612980	526340	602530	337260	436110	387650	132100	129220	138240	--	--
Zmjp003031	C27H30O16	Orientin-2''-O-galactoside	Flavonoids	Flavonoid carbonoside	-	3	up	up	up	FALSE	FALSE	95350	64316	80021	333830	376120	437220	415780	444040	450930	517580	443510	204750	--	--
Lmjp002461	C27H30O16	Quercetin-3-O-neohesperidoside	Flavonoids	Flavonols	117611-67-3	1	FALSE	down	down	down	down	50975000	48479000	53899000	24295000	49222000	47474000	12150000	14521000	14717000	7936800	8212200	9945200	--	--
Zmxp003107	C27H30O16	Luteolin-7,3'-di-O-glucoside	Flavonoids	Flavones	52187-80-1	3	down	down	down	FALSE	FALSE	247190	179910	171430	59658	61259	44304	40452	41002	36598	12263	36265	15092	--	--
Lmyn001269	C27H30O16	Kaempferol-3-O-sophoroside	Flavonoids	Flavonols	19895-95-5	3	down	down	down	FALSE	down	1382600	1125900	1348000	85432	91943	80745	43246	46608	47273	21173	22880	24860	C12634	ko00944
Zmxp002867	C28H32O16	Chrysoeriol-5,7-di-O-glucoside	Flavonoids	Flavones	-	3	up	up	up	FALSE	FALSE	35040	28186	15394	100120	100370	88814	120040	117610	105950	96856	125400	85617	--	--
MWSHY0064	C28H32O16	Isorhamnetin-3-O-neohesperidoside*	Flavonoids	Flavonols	55033-90-4	1	down	down	down	FALSE	down	2905600	3622400	3677200	960640	999820	1337400	859460	711380	906330	381470	241390	313050	--	--
Zmxp004480	C28H32O16	Chrysoeriol-7-O-gentiobioside	Flavonoids	Flavones	-	3	up	up	up	FALSE	FALSE	43744	38003	28529	83788	111700	151180	153100	117480	110810	163290	156720	109320	--	--
MWSHY0135	C28H32O16	Isorhamnetin-3-O-rutinoside (Narcissin)*	Flavonoids	Flavonols	604-80-8	1	down	down	down	FALSE	down	3084000	3501100	3937900	1134900	1141600	1326200	820920	863210	753060	323360	373740	346790	--	--
Zmcp002666	C27H30O17	Quercetin-3,7-Di-O-glucoside	Flavonoids	Flavonols	-	1	down	FALSE	down	FALSE	FALSE	64626	56523	70323	26268	25168	17343	13647	46955	10025	10438	16987	20993	--	--
MWSHY0162	C27H30O17	Quercetin-3-O-sophoroside (Baimaside)	Flavonoids	Flavonols	18609-17-1	1	down	down	down	FALSE	down	717770	519440	831760	235150	267570	133060	114840	145170	99570	57978	50852	62844	C12667	ko00944
pmb0618	C28H34O16	Hesperetin-8-C-glucoside-3'-O-glucoside	Flavonoids	Flavonoid carbonoside	-	3	down	down	down	FALSE	down	262510	220910	210190	75605	115360	123770	65823	74752	102270	20575	20298	27803	--	--
Hmgp003086	C29H34O16	Tricin-7-O-rutinoside*	Flavonoids	Flavones	-	3	FALSE	down	FALSE	down	FALSE	25115	20543	19657	18609	20969	13695	7693.9	5130.4	11723	10275	12821	16261	--	--
Lmgp004959	C29H34O16	Tricin-7-O-neohesperidoside*	Flavonoids	Flavones	53766-40-8	3	FALSE	down	down	down	down	31667	24821	27965	27064	20793	17093	11966	9309	10263	9408.4	10049	12131	--	--
Lmmp002560	C27H28O18	Quercetin-3-O-(2''-O-glucosyl)glucuronide	Flavonoids	Flavonols	-	3	FALSE	FALSE	FALSE	FALSE	down	56063	141650	35907	147530	121860	241530	91456	85119	84189	24569	39061	24920	--	--
Hmcp001578	C28H32O17	Isorhamnetin-3,7-O-diglucoside	Flavonoids	Flavonols	6758-51-6	2	FALSE	down	down	down	down	19218	11596	17077	7598.5	18634	13452	9	9	9	9	9	9	--	--
Hmqp003184	C29H30O18	Luteolin-7-O-(6''-malonyl)glucoside-5-O-arabinoside	Flavonoids	Flavones	-	3	up	FALSE	FALSE	FALSE	down	17417	13099	18331	41164	38574	41946	29863	25250	23437	11449	21627	15226	--	--
Lmmp003266	C29H30O19	Quercetin-3-O-(2''-O-malonyl)glucoside-7-O-arabinoside	Flavonoids	Flavonols	-	1	up	up	up	up	FALSE	10096	19050	17733	135750	64566	102210	258340	166340	260350	157320	164880	156660	--	--
Xmyp004678	C32H38O19	Kaempferol-3-O-(2-O-Xylosyl-6-O-Rhamnosyl)Glucoside	Flavonoids	Flavonols	-	1	up	up	up	FALSE	FALSE	263530	167670	152920	7955300	6760200	6184200	7830600	7022100	6546000	5120800	3822400	4137100	--	--
Zmlp003063	C33H40O19	Luteolin-7-O-(2''-O-rhamnosyl)rutinoside*	Flavonoids	Flavones	-	3	up	up	up	FALSE	FALSE	193100	166900	110100	1146900	1066700	1233900	1200800	1125300	1104300	1097700	1118900	1096700	--	--
mws1035	C33H40O19	Kaempferol-3-O-robinoside-7-O-rhamnoside (Robinin)*	Flavonoids	Flavonols	301-19-9	3	up	up	up	FALSE	FALSE	155900	111210	105520	1015900	969110	973810	803520	922140	929380	814580	698030	815950	C10178	--
Lmsp003881	C33H40O19	Kaempferol-3-O-rutinoside-7-O-rhamnoside	Flavonoids	Flavonols	-	1	up	up	up	FALSE	FALSE	11054000	6894700	5280300	48988000	42433000	50610000	45023000	49526000	45114000	52456000	46379000	46853000	--	--
HJAP061	C32H38O20	Quercetin-3-O-(2''-O-arabinosyl)rutinoside	Flavonoids	Flavonols	-	1	up	up	up	FALSE	FALSE	3288300	3204900	2832500	49597000	46448000	54018000	69496000	72243000	72525000	54151000	52248000	54824000	--	--
Hmcp001618	C32H38O20	Quercetin-3-O-(2''-O-Xylosyl)rutinoside	Flavonoids	Flavonols	129235-39-8	3	up	up	up	FALSE	FALSE	76957	62209	50887	1013100	801430	980550	1185700	1422500	1375600	1034400	1028200	988860	C10175	ko00944
Hmqp002870	C32H38O20	Luteolin-7-O-Sophoroside-5-O-arabinoside	Flavonoids	Flavones	-	3	up	up	up	FALSE	FALSE	501420	368250	267180	1699000	2840600	3077100	2543600	2570000	2275900	2736500	2591300	1748700	--	--
Zmgp002857	C33H40O20	Quercetin-3-O-α-rhamnosyl (1→2)-[α-rhamnosyl (1→6)]-β-glucoside	Flavonoids	Flavonols	-	3	up	up	up	FALSE	FALSE	703560	809530	770950	2448000	2083900	2088300	2525700	1889400	1946700	1621200	1811000	1356900	--	--
Lnrp102163	C33H40O20	Quercetin-3-O-rutinoside-7-O-rhamnoside	Flavonoids	Flavonols	-	3	up	up	FALSE	FALSE	FALSE	744100	895000	577380	1896700	1596000	2301900	2417700	1662000	2962700	1176200	1445100	1758100	--	--
Lmpp003268	C33H40O20	Kaempferol-3-O-rutinoside-7-O-glucoside	Flavonoids	Flavonols	-	3	up	up	up	FALSE	FALSE	17847	9579.2	6673	100920	120490	60387	119760	93214	103400	85716	85587	95692	--	--
Lmsp003161	C33H40O20	Kaempferol-3-O-sophoroside-7-O-rhamnoside	Flavonoids	Flavonols	-	3	FALSE	FALSE	down	FALSE	FALSE	98446	115960	103270	67714	85684	89058	60389	66568	65722	54295	50196	43317	--	--
Hmcp001329	C32H38O21	Quercetin-3-O-xylosyl(1→2)glucosyl(1→2)glucoside	Flavonoids	Flavonols	-	3	up	up	up	up	up	9	9	9	11185	7944.6	16733	47842	39771	40408	36155	27339	27511	--	--
Lmjp003206	C32H38O21	Quercetin-3-O-Sambubioside-5-O-Glucoside	Flavonoids	Flavonols	-	3	up	FALSE	FALSE	FALSE	FALSE	1941600	2086100	2019000	4354300	4593800	3903900	3851100	3817000	4369100	4509700	4192700	2823800	--	--
pmb0592	C34H42O20	Chrysoeriol-7-O-rutinoside-5-O-glucoside	Flavonoids	Flavones	-	3	FALSE	up	up	up	FALSE	16104	23002	27028	33056	28413	45088	67073	77678	69017	64215	58378	57998	--	--
HJAP128	C34H42O20	Isorhamnetin-3-O-rutinoside-7-O-rhamnoside	Flavonoids	Flavonols	-	2	up	up	up	FALSE	FALSE	1221700	1356800	1264700	2751200	2795500	2822700	4382800	3615700	4309400	3205500	3735800	3460800	--	--
Lmsp002982	C33H40O21	Quercetin-3-O-sophoroside-7-O-rhamnoside	Flavonoids	Flavonols	-	3	down	down	down	FALSE	down	905890	921870	964080	385280	322860	370640	203880	246850	237570	139560	114020	143560	--	--
Lmmp002755	C33H40O21	Quercetin-7-O-rutinoside-4'-O-glucoside	Flavonoids	Flavonols	-	3	up	up	up	FALSE	FALSE	164140	153420	130750	403750	345340	351330	423610	543100	270910	460490	391480	498740	--	--
HJAP023	C33H40O21	Kaempferol-6,8-di-C-glucoside-7-O-glucoside	Flavonoids	Flavonoid carbonoside	-	3	down	down	down	FALSE	down	258590	244590	277610	114650	75213	93299	68132	55848	54866	26134	38069	33423	--	--
Lmsp003790	C34H42O21	Isorhamnetin-3-O-sophoroside-7-O-rhamnoside	Flavonoids	Flavonols	41328-75-0	3	down	FALSE	FALSE	FALSE	FALSE	66071	165910	109780	18850	15321	14399	12714	9	9	5061.4	3605.6	9	--	--
Lmsp003853	C42H46O23	Quercetin-3-O-(6''-O-p-coumaroyl)sophoroside-7-O-rhamnoside	Flavonoids	Flavonols	-	3	up	up	up	FALSE	FALSE	74701	74996	68210	301910	318990	386440	627390	462680	694950	702580	592630	705600	--	--
HJAP136	C39H50O25	Quercetin-3-O-(2''-O-rhamnosyl)rutinoside-7-O-glucoside	Flavonoids	Flavonols	-	3	up	up	up	FALSE	FALSE	73359	70692	42690	266980	370600	355320	624500	543080	710280	684730	565030	717030	--	--
Lmhp002374	C39H50O25	Quercetin-3-O-glucosyl(1→4)rhamnoside-7-O-rutinoside	Flavonoids	Flavonols	-	2	up	up	up	FALSE	FALSE	77496	54984	65454	305760	296650	394430	552130	513370	412250	529080	562880	622040	--	--
HJAP123	C40H52O25	Isorhamnetin-3-O-rutinoside-7-O-rutinoside	Flavonoids	Flavonols	-	3	down	FALSE	FALSE	FALSE	FALSE	12630	11461	13067	4952.9	5447.9	4415.5	5495.2	7661.3	12681	6562.9	7755.8	6067.2	--	--
