# Supplementary material for: Integrative Analysis of the Metabolome and Transcriptome Provides Insights into the Mechanisms of Flavonoid Biosynthesis in Quinoa Seeds at Different Developmental Stages
Source: Metabolites. 2022 Sep 22;12(10):887. doi: 10.3390/metabo12100887 (PMC9609036; doi:10.3390/metabo12100887)
Supplement: Supplementary file 1 [file metabolites-12-00887-s001.zip › Table.S10.xlsx]

## Sheet: Sheet1
Sample	Raw Reads	Clean Reads	Clean Base(G)	Error Rate(%)	Q20(%)	Q30(%)	GC Content(%)
FB2-4	47996758	44392494	6.66	0.03	97.7	93.67	43.61
FB2-5	51161864	46622934	6.99	0.03	97.34	92.66	43.77
FB2-6	50446004	46155984	6.92	0.03	97.15	92.3	43.75
RB2-4	43553558	41361584	6.2	0.03	97.65	93.62	45.13
RB2-5	48187864	45582322	6.84	0.03	97.54	93.31	45.38
RB2-6	48580544	45522100	6.83	0.03	97.62	93.49	45.5
DB2-4	54341318	48788670	7.32	0.03	97.14	92.27	44.61
DB2-5	50144530	46492104	6.97	0.03	97.66	93.72	44.1
DB2-6	49951768	47598104	7.14	0.03	97.62	93.41	44.15
MB2-4	45725184	43087954	6.46	0.03	97.71	93.84	45.42
MB2-5	49195250	46393572	6.96	0.03	97.73	93.77	45.63
MB2-6	52960336	48834126	7.33	0.03	97.78	93.98	45.39
