# Supplementary material for: Integrative Analysis of the Metabolome and Transcriptome Provides Insights into the Mechanisms of Flavonoid Biosynthesis in Quinoa Seeds at Different Developmental Stages
Source: Metabolites. 2022 Sep 22;12(10):887. doi: 10.3390/metabo12100887 (PMC9609036; doi:10.3390/metabo12100887)
Supplement: Supplementary file 1 [file metabolites-12-00887-s001.zip › Table.S11.xlsx]

## Sheet: Sheet1
Sample	Total Reads	Reads mapped	Unique mapped	Multi mapped	Read1 mapped	Read2 mapped	'+' mapped	'-' mapped
DB2-4	48788670	46060566(94.41%)	44201644(90.60%)	2664397(3.81%)	22136760(45.37%)	22064884(45.23%)	22062121(45.22%)	22139523(45.38%)
DB2-5	46492104	43638698(93.86%)	41938155(90.20%)	2488280(3.66%)	21076918(45.33%)	20861237(44.87%)	20946554(45.05%)	20991601(45.15%)
DB2-6	47598104	45094367(94.74%)	43324091(91.02%)	2611740(3.72%)	21723088(45.64%)	21601003(45.38%)	21640217(45.46%)	21683874(45.56%)
FB2-4	44392494	42227185(95.12%)	40462153(91.15%)	2528354(3.98%)	20325259(45.79%)	20136894(45.36%)	20202030(45.51%)	20260123(45.64%)
FB2-5	46622934	44372212(95.17%)	42475375(91.10%)	2660475(4.07%)	21256263(45.59%)	21219112(45.51%)	21202677(45.48%)	21272698(45.63%)
FB2-6	46155984	43842259(94.99%)	41880440(90.74%)	2720853(4.25%)	20981265(45.46%)	20899175(45.28%)	20901846(45.29%)	20978594(45.45%)
MB2-4	43087954	36911743(85.67%)	34846678(80.87%)	3587041(4.79%)	17515780(40.65%)	17330898(40.22%)	17411822(40.41%)	17434856(40.46%)
MB2-5	46393572	39398123(84.92%)	37282559(80.36%)	3509255(4.56%)	18709407(40.33%)	18573152(40.03%)	18624098(40.14%)	18658461(40.22%)
MB2-6	48834126	41952375(85.91%)	39697877(81.29%)	3744169(4.62%)	19944346(40.84%)	19753531(40.45%)	19826704(40.60%)	19871173(40.69%)
RB2-4	41361584	39516685(95.54%)	38135452(92.20%)	1903395(3.34%)	19164730(46.33%)	18970722(45.87%)	19035029(46.02%)	19100423(46.18%)
RB2-5	45582322	43552394(95.55%)	42031879(92.21%)	2125443(3.34%)	21111822(46.32%)	20920057(45.90%)	20979696(46.03%)	21052183(46.18%)
RB2-6	45522100	43521820(95.61%)	42040067(92.35%)	2078762(3.26%)	21109677(46.37%)	20930390(45.98%)	20981997(46.09%)	21058070(46.26%)
