# Supplementary material for: Integrative Analysis of the Metabolome and Transcriptome Provides Insights into the Mechanisms of Flavonoid Biosynthesis in Quinoa Seeds at Different Developmental Stages
Source: Metabolites. 2022 Sep 22;12(10):887. doi: 10.3390/metabo12100887 (PMC9609036; doi:10.3390/metabo12100887)
Supplement: Supplementary file 1 [file metabolites-12-00887-s001.zip › Table.S12.xlsx]

## Sheet: Sheet1
ID	Family	Category	Classification
gene-LOC110734359	MYB	TF	MYB->MYB
gene-LOC110734388	bHLH	TF	bHLH
gene-LOC110734389	bHLH	TF	bHLH
gene-LOC110734422	bHLH	TF	bHLH
gene-LOC110734522	MYB-related	TF	MYB->MYB-related
gene-LOC110734556	MYB-related	TF	MYB->MYB-related
gene-LOC110735032	MYB	TF	MYB->MYB
gene-LOC110735238	MYB	TF	MYB->MYB
gene-LOC110735294	MYB	TF	MYB->MYB
gene-LOC110735364	bHLH	TF	bHLH
gene-LOC110736138	MYB-related	TF	MYB->MYB-related
gene-LOC110736180	bHLH	TF	bHLH
gene-LOC110736213	MYB	TF	MYB->MYB
gene-LOC110736354	MYB	TF	MYB->MYB
gene-LOC110736398	MYB-related	TF	MYB->MYB-related
gene-LOC110736579	bHLH	TF	bHLH
gene-LOC110736581	MYB	TF	MYB->MYB
gene-LOC110736589	MYB	TF	MYB->MYB
gene-LOC110736896	MYB-related	TF	MYB->MYB-related
gene-LOC110736958	bHLH	TF	bHLH
gene-LOC110737088	bHLH	TF	bHLH
gene-LOC110737435	MYB	TF	MYB->MYB
gene-LOC110737453	bHLH	TF	bHLH
gene-LOC110737756	bHLH	TF	bHLH
gene-LOC110737834	MYB	TF	MYB->MYB
gene-LOC110738293	MYB	TF	MYB->MYB
gene-LOC110739176	MYB-related	TF	MYB->MYB-related
gene-LOC110739350	MYB	TF	MYB->MYB
gene-LOC110739757	bHLH	TF	bHLH
gene-LOC110739941	bHLH	TF	bHLH
gene-LOC110740143	bHLH	TF	bHLH
gene-LOC110740227	MYB	TF	MYB->MYB
gene-LOC110681615	MYB	TF	MYB->MYB
gene-LOC110681689	bHLH	TF	bHLH
gene-LOC110681724	bHLH	TF	bHLH
gene-LOC110681788	MYB-related	TF	MYB->MYB-related
gene-LOC110682071	bHLH	TF	bHLH
gene-LOC110682220	MYB	TF	MYB->MYB
gene-LOC110682321	bHLH	TF	bHLH
gene-LOC110682359	MYB	TF	MYB->MYB
gene-LOC110682478	MYB	TF	MYB->MYB
gene-LOC110682499	MYB-related	TF	MYB->MYB-related
gene-LOC110682805	MYB	TF	MYB->MYB
gene-LOC110682955	bHLH	TF	bHLH
gene-LOC110682998	MYB	TF	MYB->MYB
gene-LOC110683042	MYB-related	TF	MYB->MYB-related
gene-LOC110683417	MYB	TF	MYB->MYB
gene-LOC110683658	MYB-related	TF	MYB->MYB-related
gene-LOC110683740	MYB-related	TF	MYB->MYB-related
gene-LOC110683971	MYB	TF	MYB->MYB
gene-LOC110683995	bHLH	TF	bHLH
gene-LOC110684118	MYB	TF	MYB->MYB
gene-LOC110684364	MYB-related	TF	MYB->MYB-related
gene-LOC110685041	bHLH	TF	bHLH
gene-LOC110685099	bHLH	TF	bHLH
gene-LOC110685315	MYB	TF	MYB->MYB
gene-LOC110685339	MYB	TF	MYB->MYB
gene-LOC110685600	bHLH	TF	bHLH
gene-LOC110685784	MYB	TF	MYB->MYB
gene-LOC110685804	MYB-related	TF	MYB->MYB-related
gene-LOC110686044	MYB-related	TF	MYB->MYB-related
gene-LOC110686047	bHLH	TF	bHLH
gene-LOC110686065	bHLH	TF	bHLH
gene-LOC110686735	MYB	TF	MYB->MYB
gene-LOC110687068	MYB	TF	MYB->MYB
gene-LOC110687069	MYB	TF	MYB->MYB
gene-LOC110687138	bHLH	TF	bHLH
gene-LOC110687197	MYB-related	TF	MYB->MYB-related
gene-LOC110687209	MYB	TF	MYB->MYB
gene-LOC110687278	bHLH	TF	bHLH
gene-LOC110687809	bHLH	TF	bHLH
gene-LOC110688099	MYB-related	TF	MYB->MYB-related
gene-LOC110688305	MYB	TF	MYB->MYB
gene-LOC110688480	MYB-related	TF	MYB->MYB-related
gene-LOC110688534	MYB-related	TF	MYB->MYB-related
gene-LOC110688662	bHLH	TF	bHLH
gene-LOC110688684	bHLH	TF	bHLH
gene-LOC110688940	bHLH	TF	bHLH
gene-LOC110688951	MYB	TF	MYB->MYB
gene-LOC110688986	MYB	TF	MYB->MYB
gene-LOC110689432	MYB	TF	MYB->MYB
gene-LOC110689589	MYB	TF	MYB->MYB
gene-LOC110690011	bHLH	TF	bHLH
gene-LOC110690045	bHLH	TF	bHLH
gene-LOC110690422	MYB	TF	MYB->MYB
gene-LOC110690437	MYB-related	TF	MYB->MYB-related
gene-LOC110690485	bHLH	TF	bHLH
gene-LOC110690575	bHLH	TF	bHLH
gene-LOC110691103	MYB	TF	MYB->MYB
gene-LOC110691272	bHLH	TF	bHLH
gene-LOC110691375	MYB-related	TF	MYB->MYB-related
gene-LOC110691400	MYB-related	TF	MYB->MYB-related
gene-LOC110691429	bHLH	TF	bHLH
gene-LOC110691434	bHLH	TF	bHLH
gene-LOC110691462	MYB-related	TF	MYB->MYB-related
gene-LOC110691768	bHLH	TF	bHLH
gene-LOC110692100	bHLH	TF	bHLH
gene-LOC110692226	bHLH	TF	bHLH
gene-LOC110692372	MYB	TF	MYB->MYB
gene-LOC110692520	MYB	TF	MYB->MYB
gene-LOC110692760	MYB	TF	MYB->MYB
gene-LOC110692912	MYB-related	TF	MYB->MYB-related
gene-LOC110693034	MYB	TF	MYB->MYB
gene-LOC110693067	bHLH	TF	bHLH
gene-LOC110693138	bHLH	TF	bHLH
gene-LOC110693447	bHLH	TF	bHLH
gene-LOC110693510	MYB	TF	MYB->MYB
gene-LOC110693512	MYB-related	TF	MYB->MYB-related
gene-LOC110693556	MYB-related	TF	MYB->MYB-related
gene-LOC110693625	bHLH	TF	bHLH
gene-LOC110693750	MYB	TF	MYB->MYB
gene-LOC110693767	bHLH	TF	bHLH
gene-LOC110693878	MYB-related	TF	MYB->MYB-related
gene-LOC110693965	MYB	TF	MYB->MYB
gene-LOC110694167	bHLH	TF	bHLH
gene-LOC110694532	bHLH	TF	bHLH
gene-LOC110694699	bHLH	TF	bHLH
gene-LOC110694880	MYB-related	TF	MYB->MYB-related
gene-LOC110694971	bHLH	TF	bHLH
gene-LOC110694991	bHLH	TF	bHLH
gene-LOC110695234	bHLH	TF	bHLH
gene-LOC110695361	bHLH	TF	bHLH
gene-LOC110695486	bHLH	TF	bHLH
gene-LOC110695946	MYB-related	TF	MYB->MYB-related
gene-LOC110695988	bHLH	TF	bHLH
gene-LOC110696026	MYB	TF	MYB->MYB
gene-LOC110696064	bHLH	TF	bHLH
gene-LOC110696067	MYB-related	TF	MYB->MYB-related
gene-LOC110696488	MYB	TF	MYB->MYB
gene-LOC110697152	bHLH	TF	bHLH
gene-LOC110697154	bHLH	TF	bHLH
gene-LOC110697343	MYB-related	TF	MYB->MYB-related
gene-LOC110697405	MYB	TF	MYB->MYB
gene-LOC110697406	MYB	TF	MYB->MYB
gene-LOC110697415	bHLH	TF	bHLH
gene-LOC110697487	MYB	TF	MYB->MYB
gene-LOC110697589	MYB-related	TF	MYB->MYB-related
gene-LOC110697685	MYB-related	TF	MYB->MYB-related
gene-LOC110697712	MYB-related	TF	MYB->MYB-related
gene-LOC110697713	MYB-related	TF	MYB->MYB-related
gene-LOC110697986	bHLH	TF	bHLH
gene-LOC110698065	bHLH	TF	bHLH
gene-LOC110698068	bHLH	TF	bHLH
gene-LOC110698192	bHLH	TF	bHLH
gene-LOC110698454	bHLH	TF	bHLH
gene-LOC110698455	MYB-related	TF	MYB->MYB-related
gene-LOC110698458	MYB-related	TF	MYB->MYB-related
gene-LOC110698827	bHLH	TF	bHLH
gene-LOC110698882	bHLH	TF	bHLH
gene-LOC110699211	MYB	TF	MYB->MYB
gene-LOC110699230	MYB-related	TF	MYB->MYB-related
gene-LOC110699302	bHLH	TF	bHLH
gene-LOC110699426	MYB	TF	MYB->MYB
gene-LOC110700012	MYB	TF	MYB->MYB
gene-LOC110700022	MYB	TF	MYB->MYB
gene-LOC110700029	MYB	TF	MYB->MYB
gene-LOC110700141	MYB	TF	MYB->MYB
gene-LOC110700336	MYB	TF	MYB->MYB
gene-LOC110700484	MYB-related	TF	MYB->MYB-related
gene-LOC110700490	bHLH	TF	bHLH
gene-LOC110700562	bHLH	TF	bHLH
gene-LOC110700593	MYB	TF	MYB->MYB
gene-LOC110700658	bHLH	TF	bHLH
gene-LOC110700793	MYB	TF	MYB->MYB
gene-LOC110700857	MYB	TF	MYB->MYB
gene-LOC110701023	MYB	TF	MYB->MYB
gene-LOC110701068	MYB-related	TF	MYB->MYB-related
gene-LOC110701253	MYB	TF	MYB->MYB
gene-LOC110701254	bHLH	TF	bHLH
gene-LOC110701261	MYB	TF	MYB->MYB
gene-LOC110701641	bHLH	TF	bHLH
gene-LOC110701735	MYB	TF	MYB->MYB
gene-LOC110702088	MYB	TF	MYB->MYB
gene-LOC110702120	MYB	TF	MYB->MYB
gene-LOC110702189	bHLH	TF	bHLH
gene-LOC110702269	bHLH	TF	bHLH
gene-LOC110702384	bHLH	TF	bHLH
gene-LOC110702426	bHLH	TF	bHLH
gene-LOC110702428	bHLH	TF	bHLH
gene-LOC110702482	MYB	TF	MYB->MYB
gene-LOC110702549	MYB	TF	MYB->MYB
gene-LOC110702791	MYB	TF	MYB->MYB
gene-LOC110702898	bHLH	TF	bHLH
gene-LOC110703055	bHLH	TF	bHLH
gene-LOC110703398	bHLH	TF	bHLH
gene-LOC110703537	MYB	TF	MYB->MYB
gene-LOC110703885	MYB-related	TF	MYB->MYB-related
gene-LOC110703894	bHLH	TF	bHLH
gene-LOC110703906	bHLH	TF	bHLH
gene-LOC110704344	MYB	TF	MYB->MYB
gene-LOC110704415	MYB	TF	MYB->MYB
gene-LOC110704584	MYB-related	TF	MYB->MYB-related
gene-LOC110704696	bHLH	TF	bHLH
gene-LOC110705094	MYB-related	TF	MYB->MYB-related
gene-LOC110705101	MYB-related	TF	MYB->MYB-related
gene-LOC110705102	bHLH	TF	bHLH
gene-LOC110705509	MYB	TF	MYB->MYB
gene-LOC110705615	MYB	TF	MYB->MYB
gene-LOC110705672	MYB	TF	MYB->MYB
gene-LOC110705762	bHLH	TF	bHLH
gene-LOC110705780	MYB	TF	MYB->MYB
gene-LOC110705817	MYB-related	TF	MYB->MYB-related
gene-LOC110706232	MYB	TF	MYB->MYB
gene-LOC110706295	bHLH	TF	bHLH
gene-LOC110706296	bHLH	TF	bHLH
gene-LOC110706298	bHLH	TF	bHLH
gene-LOC110706330	MYB	TF	MYB->MYB
gene-LOC110706600	MYB-related	TF	MYB->MYB-related
gene-LOC110706645	bHLH	TF	bHLH
gene-LOC110706729	bHLH	TF	bHLH
gene-LOC110706832	MYB-related	TF	MYB->MYB-related
gene-LOC110707075	MYB	TF	MYB->MYB
gene-LOC110707211	bHLH	TF	bHLH
gene-LOC110707229	bHLH	TF	bHLH
gene-LOC110707245	MYB-related	TF	MYB->MYB-related
gene-LOC110707415	bHLH	TF	bHLH
gene-LOC110707416	bHLH	TF	bHLH
gene-LOC110707417	bHLH	TF	bHLH
gene-LOC110707446	bHLH	TF	bHLH
gene-LOC110707462	bHLH	TF	bHLH
gene-LOC110707463	bHLH	TF	bHLH
gene-LOC110707468	bHLH	TF	bHLH
gene-LOC110708260	MYB-related	TF	MYB->MYB-related
gene-LOC110708316	MYB	TF	MYB->MYB
gene-LOC110708433	bHLH	TF	bHLH
gene-LOC110708581	bHLH	TF	bHLH
gene-LOC110708638	MYB-related	TF	MYB->MYB-related
gene-LOC110708734	bHLH	TF	bHLH
gene-LOC110709433	MYB	TF	MYB->MYB
gene-LOC110709467	MYB	TF	MYB->MYB
gene-LOC110709474	MYB	TF	MYB->MYB
gene-LOC110709649	MYB-related	TF	MYB->MYB-related
gene-LOC110709694	bHLH	TF	bHLH
gene-LOC110709793	MYB-related	TF	MYB->MYB-related
gene-LOC110709923	MYB	TF	MYB->MYB
gene-LOC110709935	bHLH	TF	bHLH
gene-LOC110710184	MYB-related	TF	MYB->MYB-related
gene-LOC110710552	bHLH	TF	bHLH
gene-LOC110710630	bHLH	TF	bHLH
gene-LOC110710653	bHLH	TF	bHLH
gene-LOC110710655	bHLH	TF	bHLH
gene-LOC110710667	bHLH	TF	bHLH
gene-LOC110710750	MYB	TF	MYB->MYB
gene-LOC110711030	MYB	TF	MYB->MYB
gene-LOC110711143	MYB-related	TF	MYB->MYB-related
gene-LOC110711493	bHLH	TF	bHLH
gene-LOC110711653	bHLH	TF	bHLH
gene-LOC110711703	bHLH	TF	bHLH
gene-LOC110711773	MYB	TF	MYB->MYB
gene-LOC110711797	bHLH	TF	bHLH
gene-LOC110712023	MYB	TF	MYB->MYB
gene-LOC110712167	MYB	TF	MYB->MYB
gene-LOC110712547	bHLH	TF	bHLH
gene-LOC110712645	MYB-related	TF	MYB->MYB-related
gene-LOC110712760	MYB	TF	MYB->MYB
gene-LOC110712886	bHLH	TF	bHLH
gene-LOC110712914	bHLH	TF	bHLH
gene-LOC110712943	MYB-related	TF	MYB->MYB-related
gene-LOC110712962	bHLH	TF	bHLH
gene-LOC110713027	MYB-related	TF	MYB->MYB-related
gene-LOC110713348	bHLH	TF	bHLH
gene-LOC110713381	bHLH	TF	bHLH
gene-LOC110713551	MYB-related	TF	MYB->MYB-related
gene-LOC110713643	bHLH	TF	bHLH
gene-LOC110713807	bHLH	TF	bHLH
gene-LOC110713844	bHLH	TF	bHLH
gene-LOC110714058	bHLH	TF	bHLH
gene-LOC110714062	bHLH	TF	bHLH
gene-LOC110714201	bHLH	TF	bHLH
gene-LOC110714269	MYB	TF	MYB->MYB
gene-LOC110714293	MYB	TF	MYB->MYB
gene-LOC110714321	bHLH	TF	bHLH
gene-LOC110714364	bHLH	TF	bHLH
gene-LOC110714547	MYB-related	TF	MYB->MYB-related
gene-LOC110714549	MYB	TF	MYB->MYB
gene-LOC110714573	MYB	TF	MYB->MYB
gene-LOC110714587	MYB-related	TF	MYB->MYB-related
gene-LOC110714609	bHLH	TF	bHLH
gene-LOC110714617	bHLH	TF	bHLH
gene-LOC110714640	MYB	TF	MYB->MYB
gene-LOC110714718	bHLH	TF	bHLH
gene-LOC110714732	bHLH	TF	bHLH
gene-LOC110714742	MYB	TF	MYB->MYB
gene-LOC110714964	bHLH	TF	bHLH
gene-LOC110714969	MYB	TF	MYB->MYB
gene-LOC110715062	bHLH	TF	bHLH
gene-LOC110715406	bHLH	TF	bHLH
gene-LOC110715517	bHLH	TF	bHLH
gene-LOC110715558	MYB	TF	MYB->MYB
gene-LOC110715681	MYB-related	TF	MYB->MYB-related
gene-LOC110715753	MYB	TF	MYB->MYB
gene-LOC110716034	bHLH	TF	bHLH
gene-LOC110716316	bHLH	TF	bHLH
gene-LOC110716334	MYB	TF	MYB->MYB
gene-LOC110716428	MYB	TF	MYB->MYB
gene-LOC110716464	MYB	TF	MYB->MYB
gene-LOC110716621	bHLH	TF	bHLH
gene-LOC110716830	bHLH	TF	bHLH
gene-LOC110716850	bHLH	TF	bHLH
gene-LOC110716936	bHLH	TF	bHLH
gene-LOC110717259	MYB	TF	MYB->MYB
gene-LOC110717536	bHLH	TF	bHLH
gene-LOC110717751	MYB	TF	MYB->MYB
gene-LOC110717813	bHLH	TF	bHLH
gene-LOC110717907	MYB	TF	MYB->MYB
gene-LOC110717954	MYB	TF	MYB->MYB
gene-LOC110718102	MYB	TF	MYB->MYB
gene-LOC110718216	bHLH	TF	bHLH
gene-LOC110718520	bHLH	TF	bHLH
gene-LOC110718540	MYB	TF	MYB->MYB
gene-LOC110718583	bHLH	TF	bHLH
gene-LOC110718804	MYB	TF	MYB->MYB
gene-LOC110718964	bHLH	TF	bHLH
gene-LOC110718978	MYB	TF	MYB->MYB
gene-LOC110718994	bHLH	TF	bHLH
gene-LOC110719036	MYB	TF	MYB->MYB
gene-LOC110719200	bHLH	TF	bHLH
gene-LOC110719263	bHLH	TF	bHLH
gene-LOC110719265	bHLH	TF	bHLH
gene-LOC110719481	MYB	TF	MYB->MYB
gene-LOC110719525	bHLH	TF	bHLH
gene-LOC110719577	MYB	TF	MYB->MYB
gene-LOC110719877	MYB	TF	MYB->MYB
gene-LOC110719989	MYB	TF	MYB->MYB
gene-LOC110720001	bHLH	TF	bHLH
gene-LOC110720045	bHLH	TF	bHLH
gene-LOC110720056	MYB	TF	MYB->MYB
gene-LOC110720277	bHLH	TF	bHLH
gene-LOC110720279	MYB	TF	MYB->MYB
gene-LOC110720643	MYB	TF	MYB->MYB
gene-LOC110720946	MYB	TF	MYB->MYB
gene-LOC110721094	MYB	TF	MYB->MYB
gene-LOC110721141	MYB-related	TF	MYB->MYB-related
gene-LOC110721172	bHLH	TF	bHLH
gene-LOC110721273	MYB	TF	MYB->MYB
gene-LOC110721313	bHLH	TF	bHLH
gene-LOC110721486	bHLH	TF	bHLH
gene-LOC110722085	MYB	TF	MYB->MYB
gene-LOC110722228	bHLH	TF	bHLH
gene-LOC110722492	MYB	TF	MYB->MYB
gene-LOC110722534	bHLH	TF	bHLH
gene-LOC110722544	MYB	TF	MYB->MYB
gene-LOC110722576	bHLH	TF	bHLH
gene-LOC110722577	bHLH	TF	bHLH
gene-LOC110722830	MYB-related	TF	MYB->MYB-related
gene-LOC110722942	MYB	TF	MYB->MYB
gene-LOC110723728	bHLH	TF	bHLH
gene-LOC110723852	MYB	TF	MYB->MYB
gene-LOC110724124	MYB	TF	MYB->MYB
gene-LOC110724202	bHLH	TF	bHLH
gene-LOC110724362	bHLH	TF	bHLH
gene-LOC110724364	bHLH	TF	bHLH
gene-LOC110724641	MYB-related	TF	MYB->MYB-related
gene-LOC110724753	bHLH	TF	bHLH
gene-LOC110724816	bHLH	TF	bHLH
gene-LOC110724841	MYB	TF	MYB->MYB
gene-LOC110724982	bHLH	TF	bHLH
gene-LOC110725129	bHLH	TF	bHLH
gene-LOC110725238	MYB	TF	MYB->MYB
gene-LOC110725693	bHLH	TF	bHLH
gene-LOC110725936	bHLH	TF	bHLH
gene-LOC110726185	bHLH	TF	bHLH
gene-LOC110726242	bHLH	TF	bHLH
gene-LOC110726386	bHLH	TF	bHLH
gene-LOC110726455	MYB	TF	MYB->MYB
gene-LOC110726549	bHLH	TF	bHLH
gene-LOC110726560	MYB-related	TF	MYB->MYB-related
gene-LOC110727003	bHLH	TF	bHLH
gene-LOC110727323	MYB	TF	MYB->MYB
gene-LOC110727586	MYB	TF	MYB->MYB
gene-LOC110727633	MYB-related	TF	MYB->MYB-related
gene-LOC110727731	MYB	TF	MYB->MYB
gene-LOC110727789	bHLH	TF	bHLH
gene-LOC110728106	bHLH	TF	bHLH
gene-LOC110728609	MYB-related	TF	MYB->MYB-related
gene-LOC110728915	bHLH	TF	bHLH
gene-LOC110728917	bHLH	TF	bHLH
gene-LOC110728951	bHLH	TF	bHLH
gene-LOC110729452	MYB	TF	MYB->MYB
gene-LOC110729507	bHLH	TF	bHLH
gene-LOC110729582	MYB-related	TF	MYB->MYB-related
gene-LOC110729670	MYB	TF	MYB->MYB
gene-LOC110729672	MYB	TF	MYB->MYB
gene-LOC110729752	bHLH	TF	bHLH
gene-LOC110729753	bHLH	TF	bHLH
gene-LOC110729823	bHLH	TF	bHLH
gene-LOC110729864	MYB-related	TF	MYB->MYB-related
gene-LOC110730159	MYB	TF	MYB->MYB
gene-LOC110730169	bHLH	TF	bHLH
gene-LOC110730184	bHLH	TF	bHLH
gene-LOC110730240	MYB-related	TF	MYB->MYB-related
gene-LOC110730398	MYB	TF	MYB->MYB
gene-LOC110730413	bHLH	TF	bHLH
gene-LOC110730577	bHLH	TF	bHLH
gene-LOC110730655	bHLH	TF	bHLH
gene-LOC110730656	bHLH	TF	bHLH
gene-LOC110730879	bHLH	TF	bHLH
gene-LOC110731223	MYB-related	TF	MYB->MYB-related
gene-LOC110731464	MYB	TF	MYB->MYB
gene-LOC110731581	MYB-related	TF	MYB->MYB-related
gene-LOC110731621	bHLH	TF	bHLH
gene-LOC110731636	bHLH	TF	bHLH
gene-LOC110731659	bHLH	TF	bHLH
gene-LOC110731664	MYB-related	TF	MYB->MYB-related
gene-LOC110731692	MYB	TF	MYB->MYB
gene-LOC110731789	bHLH	TF	bHLH
gene-LOC110731853	bHLH	TF	bHLH
gene-LOC110732058	MYB	TF	MYB->MYB
gene-LOC110732310	bHLH	TF	bHLH
gene-LOC110732366	MYB-related	TF	MYB->MYB-related
gene-LOC110732477	MYB-related	TF	MYB->MYB-related
gene-LOC110732543	bHLH	TF	bHLH
gene-LOC110732565	MYB	TF	MYB->MYB
gene-LOC110732723	MYB	TF	MYB->MYB
gene-LOC110732803	bHLH	TF	bHLH
gene-LOC110732814	bHLH	TF	bHLH
gene-LOC110732992	MYB-related	TF	MYB->MYB-related
gene-LOC110733009	bHLH	TF	bHLH
gene-LOC110733072	MYB	TF	MYB->MYB
gene-LOC110733118	MYB	TF	MYB->MYB
gene-LOC110733381	MYB	TF	MYB->MYB
gene-LOC110733400	MYB-related	TF	MYB->MYB-related
gene-LOC110733465	bHLH	TF	bHLH
gene-LOC110733697	MYB-related	TF	MYB->MYB-related
gene-LOC110734115	MYB	TF	MYB->MYB
gene-LOC110734241	MYB-related	TF	MYB->MYB-related
gene-LOC110734262	bHLH	TF	bHLH
gene-LOC110734325	MYB	TF	MYB->MYB
novel.4824	MYB-related	TF	MYB->MYB-related
novel.5779	MYB-related	TF	MYB->MYB-related
novel.1918	MYB-related	TF	MYB->MYB-related
novel.1556	bHLH	TF	bHLH
novel.3315	MYB-related	TF	MYB->MYB-related
