# Supplementary material for: Integrative Analysis of the Metabolome and Transcriptome Provides Insights into the Mechanisms of Flavonoid Biosynthesis in Quinoa Seeds at Different Developmental Stages
Source: Metabolites. 2022 Sep 22;12(10):887. doi: 10.3390/metabo12100887 (PMC9609036; doi:10.3390/metabo12100887)
Supplement: Supplementary file 1 [file metabolites-12-00887-s001.zip › Table.S13.xlsx]

## Sheet: Sheet1
#ID	source	feature	start	end	score	strand	frame	attributes
NC_034949.1	StringTie	transcript	30666	31212	1000	.	.	gene_id "novel.1"; transcript_id "novel.1.1";
NC_034949.1	StringTie	exon	30666	31212	1000	.	.	gene_id "novel.1"; transcript_id "novel.1.1"; exon_number "1";
NC_034949.1	StringTie	transcript	64235	64953	1000	+	.	gene_id "novel.2"; transcript_id "novel.2.1";
NC_034949.1	StringTie	exon	64235	64953	1000	+	.	gene_id "novel.2"; transcript_id "novel.2.1"; exon_number "1";
NW_018742204.1	StringTie	transcript	183444	184065	1000	.	.	gene_id "novel.3"; transcript_id "novel.3.1";
NW_018742204.1	StringTie	exon	183444	184065	1000	.	.	gene_id "novel.3"; transcript_id "novel.3.1"; exon_number "1";
NW_018742204.1	StringTie	transcript	354601	356771	1000	-	.	gene_id "novel.4"; transcript_id "novel.4.1";
NW_018742204.1	StringTie	exon	354601	355056	1000	-	.	gene_id "novel.4"; transcript_id "novel.4.1"; exon_number "1";
NW_018742204.1	StringTie	exon	355143	355233	1000	-	.	gene_id "novel.4"; transcript_id "novel.4.1"; exon_number "2";
NW_018742204.1	StringTie	exon	355498	355658	1000	-	.	gene_id "novel.4"; transcript_id "novel.4.1"; exon_number "3";
NW_018742204.1	StringTie	exon	356181	356248	1000	-	.	gene_id "novel.4"; transcript_id "novel.4.1"; exon_number "4";
NW_018742204.1	StringTie	exon	356445	356525	1000	-	.	gene_id "novel.4"; transcript_id "novel.4.1"; exon_number "5";
NW_018742204.1	StringTie	exon	356725	356771	1000	-	.	gene_id "novel.4"; transcript_id "novel.4.1"; exon_number "6";
NW_018742204.1	StringTie	transcript	357659	359025	1000	-	.	gene_id "novel.5"; transcript_id "novel.5.1";
NW_018742204.1	StringTie	exon	357659	357695	1000	-	.	gene_id "novel.5"; transcript_id "novel.5.1"; exon_number "1";
NW_018742204.1	StringTie	exon	358008	358068	1000	-	.	gene_id "novel.5"; transcript_id "novel.5.1"; exon_number "2";
NW_018742204.1	StringTie	exon	358292	358411	1000	-	.	gene_id "novel.5"; transcript_id "novel.5.1"; exon_number "3";
NW_018742204.1	StringTie	exon	358897	359025	1000	-	.	gene_id "novel.5"; transcript_id "novel.5.1"; exon_number "4";
NW_018742204.1	StringTie	transcript	617361	617586	1000	.	.	gene_id "novel.6"; transcript_id "novel.6.1";
NW_018742204.1	StringTie	exon	617361	617586	1000	.	.	gene_id "novel.6"; transcript_id "novel.6.1"; exon_number "1";
NW_018742204.1	StringTie	transcript	617860	618298	1000	.	.	gene_id "novel.7"; transcript_id "novel.7.1";
NW_018742204.1	StringTie	exon	617860	618298	1000	.	.	gene_id "novel.7"; transcript_id "novel.7.1"; exon_number "1";
NW_018742204.1	StringTie	transcript	618861	619279	1000	.	.	gene_id "novel.8"; transcript_id "novel.8.1";
NW_018742204.1	StringTie	exon	618861	619279	1000	.	.	gene_id "novel.8"; transcript_id "novel.8.1"; exon_number "1";
NW_018742204.1	StringTie	transcript	694692	694891	1000	.	.	gene_id "novel.9"; transcript_id "novel.9.1";
NW_018742204.1	StringTie	exon	694692	694891	1000	.	.	gene_id "novel.9"; transcript_id "novel.9.1"; exon_number "1";
NW_018742204.1	StringTie	transcript	737040	737344	1000	.	.	gene_id "novel.10"; transcript_id "novel.10.1";
NW_018742204.1	StringTie	exon	737040	737344	1000	.	.	gene_id "novel.10"; transcript_id "novel.10.1"; exon_number "1";
NW_018742204.1	StringTie	transcript	750306	751270	1000	.	.	gene_id "novel.11"; transcript_id "novel.11.1";
NW_018742204.1	StringTie	exon	750306	751270	1000	.	.	gene_id "novel.11"; transcript_id "novel.11.1"; exon_number "1";
NW_018742204.1	StringTie	transcript	1264795	1266025	1000	+	.	gene_id "novel.12"; transcript_id "novel.12.1";
NW_018742204.1	StringTie	exon	1264795	1265199	1000	+	.	gene_id "novel.12"; transcript_id "novel.12.1"; exon_number "1";
NW_018742204.1	StringTie	exon	1265812	1266025	1000	+	.	gene_id "novel.12"; transcript_id "novel.12.1"; exon_number "2";
NW_018742204.1	StringTie	transcript	1284253	1284549	1000	.	.	gene_id "novel.13"; transcript_id "novel.13.1";
NW_018742204.1	StringTie	exon	1284253	1284549	1000	.	.	gene_id "novel.13"; transcript_id "novel.13.1"; exon_number "1";
NW_018742204.1	StringTie	transcript	1387332	1388626	1000	.	.	gene_id "novel.14"; transcript_id "novel.14.1";
NW_018742204.1	StringTie	exon	1387332	1388626	1000	.	.	gene_id "novel.14"; transcript_id "novel.14.1"; exon_number "1";
NW_018742204.1	StringTie	transcript	1545987	1550627	1000	+	.	gene_id "novel.15"; transcript_id "novel.15.3";
NW_018742204.1	StringTie	exon	1545987	1546505	1000	+	.	gene_id "novel.15"; transcript_id "novel.15.3"; exon_number "1";
NW_018742204.1	StringTie	exon	1550566	1550627	1000	+	.	gene_id "novel.15"; transcript_id "novel.15.3"; exon_number "2";
NW_018742204.1	StringTie	transcript	1565656	1565903	1000	.	.	gene_id "novel.16"; transcript_id "novel.16.1";
NW_018742204.1	StringTie	exon	1565656	1565903	1000	.	.	gene_id "novel.16"; transcript_id "novel.16.1"; exon_number "1";
NW_018742204.1	StringTie	transcript	1641842	1642794	1000	.	.	gene_id "novel.17"; transcript_id "novel.17.1";
NW_018742204.1	StringTie	exon	1641842	1642794	1000	.	.	gene_id "novel.17"; transcript_id "novel.17.1"; exon_number "1";
NW_018742204.1	StringTie	transcript	1945856	1961023	1000	-	.	gene_id "novel.18"; transcript_id "novel.18.1";
NW_018742204.1	StringTie	exon	1945856	1946425	1000	-	.	gene_id "novel.18"; transcript_id "novel.18.1"; exon_number "1";
NW_018742204.1	StringTie	exon	1948189	1948238	1000	-	.	gene_id "novel.18"; transcript_id "novel.18.1"; exon_number "2";
NW_018742204.1	StringTie	exon	1948350	1948420	1000	-	.	gene_id "novel.18"; transcript_id "novel.18.1"; exon_number "3";
NW_018742204.1	StringTie	exon	1948504	1948558	1000	-	.	gene_id "novel.18"; transcript_id "novel.18.1"; exon_number "4";
NW_018742204.1	StringTie	exon	1960569	1961023	1000	-	.	gene_id "novel.18"; transcript_id "novel.18.1"; exon_number "5";
