# Supplementary material for: Integrative Analysis of the Metabolome and Transcriptome Provides Insights into the Mechanisms of Flavonoid Biosynthesis in Quinoa Seeds at Different Developmental Stages
Source: Metabolites. 2022 Sep 22;12(10):887. doi: 10.3390/metabo12100887 (PMC9609036; doi:10.3390/metabo12100887)
Supplement: Supplementary file 1 [file metabolites-12-00887-s001.zip › Table.S14.xls]

## Sheet: 1
ID	Primer	Primer sequence (5'to3')	Base number	Total OD value
1	gene-LOC110681848F	ACATTCTATCACTACTACTG	20	2
2	gene-LOC110681848R	GCTGAAGATTACCACTAA	18	2
3	gene-LOC110681875F	TAAGGCTGAGAATGAATC	18	2
4	gene-LOC110681875R	TGTAGAGTGGTTGGTATA	18	2
5	gene-LOC110681936F	ATCCTTTGAGAGATTTCG	18	2
6	gene-LOC110681936R	ATGTTGTTGATCGGAATA	18	2
7	gene-LOC110682196F	TAGAATTACCGACATCCA	18	2
8	gene-LOC110682196R	AACCTCAACATAGTTACAG	19	2
9	gene-LOC110682377F	CAAGCCTAACACTAATCT	18	2
10	gene-LOC110682377R	TTACCATAAGTCCCTGAT	18	2
11	gene-LOC110682378F	AATCAAGCCTAACTCAAG	18	2
12	gene-LOC110682378R	GTTCATCATGTCTCTGTA	18	2
13	gene-LOC110682402F	CGAAAGAAACTTGGAGAA	18	2
14	gene-LOC110682402R	CTTGCACTGAATAGTCAT	18	2
15	gene-LOC110687076F	GTTACTGTCTGGTTCAAT	18	2
16	gene-LOC110687076R	CGAGATCAACAACACTAG	18	2
17	gene-LOC110693741F	GTTACTGTCTGGTTCAAT	18	2
18	gene-LOC110693741R	CGAGATCAACAACACTAG	18	2
19	gene-LOC110695224F	GGCTAACATTAGTGACTC	18	2
20	gene-LOC110695224R	GGAAGGTAATAGGAGACT	18	2
21	gene-LOC110696170F	ATATTCTGGCACTTGAAG	18	2
22	gene-LOC110696170R	CGAGACTTGGTATAATGG	18	2
23	gene-LOC110697307F	TTCATCGGTAGGTTCATA	18	2
24	gene-LOC110697307R	CTTCTCCATCAACTTCTT	18	2
25	gene-LOC110700687F	CTGACACTGAGATTAAGG	18	2
26	gene-LOC110700687R	GGAAGTAAGGTAAGTTAGG	19	2
27	gene-LOC110702205F	CTCTGTATGTATGGAAGTT	19	2
28	gene-LOC110702205R	TAATAGCGAGCATAGGTA	18	2
29	gene-LOC110702210F	ACCAATGCTGATATTACA	18	2
30	gene-LOC110702210R	GATAGACCGAGAATACTG	18	2
31	gene-LOC110702441F	CAATTAGTGCTGATACCT	18	2
32	gene-LOC110702441R	GCTTCATTACCATCTCAA	18	2
33	gene-LOC110702537F	TGTCCCTAACTCTATCAT	18	2
34	gene-LOC110702537R	CACCTTCTCCTTATTAACT	19	2
35	gene-LOC110704458F	TAAGGCTTCACAATTAGG	18	2
36	gene-LOC110704458R	TTAAGGTATCTGGTAGGAA	19	2
37	gene-LOC110714012F	CCAGTGAGATAAGATTACC	19	2
38	gene-LOC110714012R	GTTGTTCTCTGCTATGTC	18	2
39	gene-LOC110714529F	CAACAATAGTAATAGCAGTAG	21	2
40	gene-LOC110714529R	ATCAACCAGTTCATCTTC	18	2
43	TUB—1 - F	ATTGAGCGTCCTACCTACACTA	22	4
44	TUB—1 - R	TGGTCTGGAACTCATTCACATC	22	4
