# Supplementary figures and images for: Integrative Analysis of the Metabolome and Transcriptome Provides Insights into the Mechanisms of Flavonoid Biosynthesis in Quinoa Seeds at Different Developmental Stages
Source: MDPI journal article supplement (doi:10.3390/metabo12100887), 2022-09-22

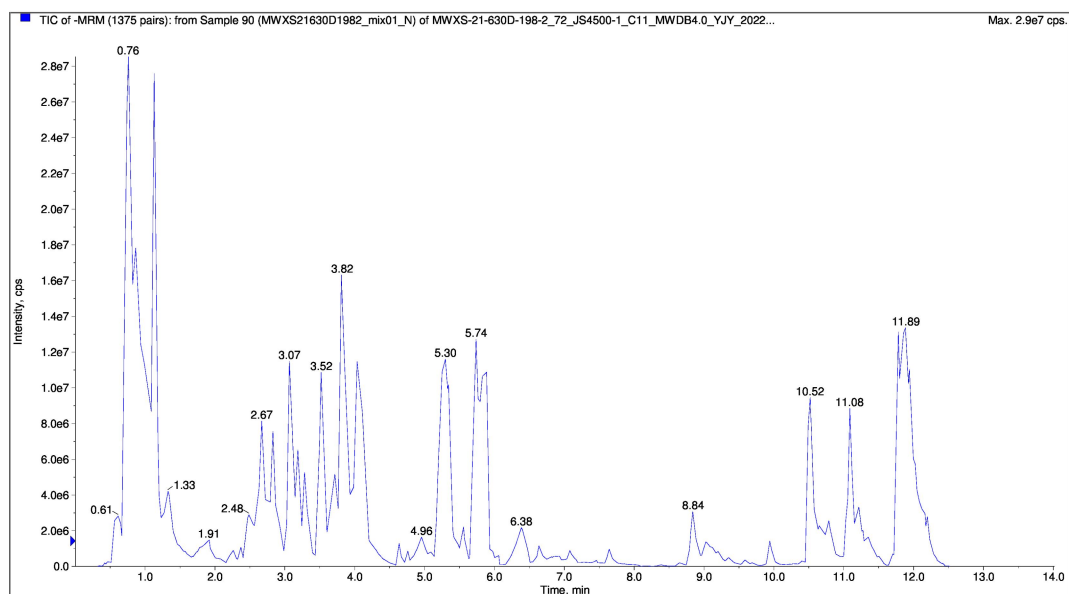

N

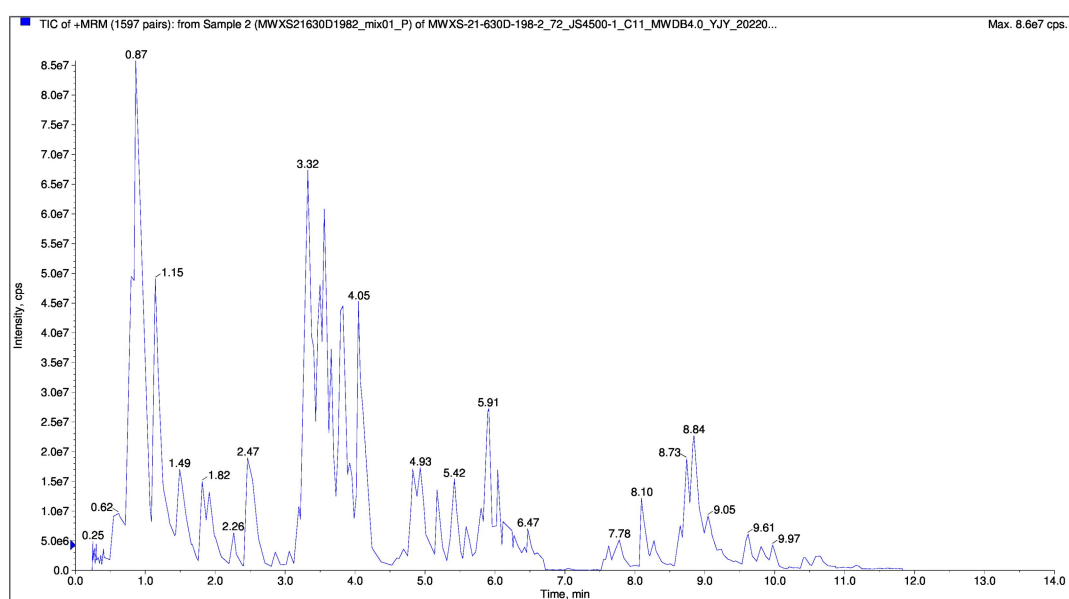

P

Figure S2. Total ion flow (TIC) showing positive and negative ion modes (from (top) to (bottom)).

Supplement: s1 [file s1]
